# Supplementary material for: Dynamic evolution of a sex-linked region
Source: Research Square preprint supplement (doi:10.21203/rs.3.rs-5980036/v1), 2025-02-10
Supplement: Supplementary file 2 [file c9554d3cfae8b8c73d90c036.xlsx]

## Sheet: W-hemizygous sites
Chr	Hemizygous sites in Sher	dp.Spurpurea_F94006	dp.Ssuchowensis_FP294	dp.Ssuchowensis_FP295	dp.Svim-F03	dp.Svim-F04	dp.Svim-F05	dp.Spurpurea_M94001	dp.Spurpurea_MFishCreek	dp.Ssuchowensis_MP63	dp.Svim-M01	dp.Svim-M06	dp.Svim-M07	Same in Svim	Same in 3spps
h1_chr15	3289577	0	1	1	0	0	0	0	0	3	0	0	0
h1_chr15	3289578	0	1	1	0	0	0	0	0	2	0	0	0
h1_chr15	3289579	0	0	0	0	0	0	0	0	1	0	0	0
h1_chr15	3289580	0	0	0	0	0	0	0	0	1	0	0	0
h1_chr15	3289581	0	0	0	0	0	0	0	0	1	0	0	0
h1_chr15	3289582	0	0	0	0	0	0	0	0	0	0	0	0
h1_chr15	3289583	0	0	0	0	0	0	0	0	0	0	0	0
h1_chr15	3289584	0	0	0	0	0	0	0	0	0	0	0	0
h1_chr15	3289585	0	0	0	0	0	0	0	0	0	0	0	0
h1_chr15	3289586	0	0	0	0	0	0	0	0	0	0	0	0
h1_chr15	3289587	0	0	0	0	0	0	0	0	0	0	0	0
h1_chr15	3289588	0	0	0	0	0	0	0	0	0	0	0	0
h1_chr15	3289589	0	0	0	0	0	0	0	0	0	0	0	0
h1_chr15	3289590	0	0	0	0	0	0	0	0	0	0	0	0
h1_chr15	3289591	0	0	0	0	0	0	0	0	0	0	0	0
h1_chr15	3289592	0	0	0	0	0	0	0	0	0	0	0	0
h1_chr15	3289593	0	0	0	0	0	0	0	0	0	0	0	0
h1_chr15	3289594	0	0	0	0	0	0	0	0	0	0	0	0
h1_chr15	3289595	0	0	0	0	0	0	0	0	0	0	0	0
h1_chr15	3289596	0	0	0	0	0	0	0	0	0	0	0	0
h1_chr15	3289597	0	0	0	1	0	0	0	0	0	0	0	0
h1_chr15	3289598	0	0	0	2	0	0	0	0	0	0	0	0
h1_chr15	3289599	0	0	0	2	0	0	4	0	0	0	0	0
h1_chr15	3289600	0	0	0	2	0	0	4	0	0	0	0	0
h1_chr15	3289601	0	0	0	2	0	0	4	0	0	0	0	0
h1_chr15	3289602	0	0	0	2	0	0	4	0	0	0	0	0
h1_chr15	3289603	0	0	0	2	0	0	4	0	0	0	0	0
h1_chr15	3289604	0	0	0	2	0	0	4	0	0	0	0	0
h1_chr15	3289605	0	3	2	3	0	0	4	0	12	2	3	0
h1_chr15	3289606	0	3	3	3	0	0	4	0	14	2	3	0
h1_chr15	3289607	0	3	3	4	0	1	4	0	15	2	3	0
h1_chr15	3289608	0	3	3	4	0	1	4	0	15	3	3	0
h1_chr15	3289609	0	4	3	4	1	1	4	0	15	3	3	1
h1_chr15	3289610	0	4	4	4	1	1	4	0	15	4	3	1
h1_chr15	3289611	0	4	4	4	1	1	4	0	16	4	3	1
h1_chr15	3289612	0	4	4	4	1	1	4	0	16	4	3	1
h1_chr15	3292074	55	79	81	8	21	6	59	50	86	21	17	13
h1_chr15	3292075	55	79	81	8	19	6	60	50	85	21	17	13
h1_chr15	3292076	55	78	81	8	19	6	59	50	86	21	16	13
h1_chr15	3292077	56	78	81	8	19	6	59	50	86	21	16	13
h1_chr15	3292078	56	80	81	8	19	6	59	50	86	21	16	13
h1_chr15	3292079	56	82	81	8	19	6	58	50	87	20	16	13
h1_chr15	3292080	55	82	83	8	19	6	58	51	86	20	16	13
h1_chr15	3292081	56	83	84	8	19	6	58	51	85	20	16	11
h1_chr15	3292082	57	83	84	7	19	6	58	51	85	20	16	11
h1_chr15	3292083	59	84	86	8	19	6	57	51	85	21	16	11
h1_chr15	3292084	59	85	88	11	20	6	57	50	85	21	16	11
h1_chr15	3292085	59	84	88	10	20	6	58	50	85	21	16	11
h1_chr15	3292086	59	84	89	10	20	6	58	50	87	19	16	11
h1_chr15	3292087	59	87	89	10	20	6	58	50	87	20	16	11
h1_chr15	3292088	58	85	88	10	20	7	59	50	86	21	16	11
h1_chr15	3292089	57	82	88	10	20	7	60	50	88	21	16	10
h1_chr15	3292090	58	82	87	10	21	7	60	51	88	21	16	10
h1_chr15	3292091	58	81	86	10	21	9	59	51	87	21	16	11
h1_chr15	3292092	57	82	86	10	21	9	58	50	86	20	16	11
h1_chr15	3292300	17	36	29	8	15	8	17	9	30	15	6	11
h1_chr15	3292301	17	36	26	7	15	8	17	8	30	15	6	11
h1_chr15	3292302	17	35	26	7	14	8	17	8	30	15	6	9
h1_chr15	3292303	17	34	25	7	14	8	17	8	29	15	6	9
h1_chr15	3292304	16	33	25	7	14	8	16	8	28	15	6	9
h1_chr15	3292305	15	32	25	7	14	8	16	8	28	15	6	9
h1_chr15	3292306	15	32	25	7	14	8	16	8	27	15	6	9
h1_chr15	3292307	15	32	25	7	14	8	15	8	27	15	6	9
h1_chr15	3292308	15	31	25	7	14	8	15	8	27	15	6	9
h1_chr15	3292309	15	29	25	7	14	8	15	8	27	15	6	9
h1_chr15	3292310	15	29	25	7	14	8	15	8	27	15	6	9
h1_chr15	3292311	15	29	25	7	14	8	15	8	27	15	6	9
h1_chr15	3292312	15	29	25	7	14	8	15	8	27	15	6	9
h1_chr15	3292313	14	29	24	7	14	8	15	8	26	15	6	9
h1_chr15	3292314	14	29	24	7	14	8	15	8	25	15	6	9
h1_chr15	3292315	14	28	24	7	14	8	13	8	24	15	6	9
h1_chr15	3292316	14	28	24	7	14	8	12	8	24	15	6	9
h1_chr15	3292317	13	28	24	7	14	8	12	8	24	15	6	9
h1_chr15	3292318	13	28	24	7	14	8	11	8	24	15	6	9
h1_chr15	3292319	13	28	24	7	13	8	11	8	24	15	6	8
h1_chr15	3292320	13	26	24	7	13	8	11	8	24	15	6	8
h1_chr15	3292321	13	26	23	7	13	8	11	8	24	15	6	8
h1_chr15	3292322	13	26	23	7	13	8	11	8	24	15	6	8
h1_chr15	3292323	13	25	23	7	13	8	11	8	24	15	6	8
h1_chr15	3292324	13	25	23	7	13	8	11	8	24	15	6	8
h1_chr15	3292325	13	24	23	7	13	8	11	7	24	15	6	8
h1_chr15	3292326	13	24	23	7	12	8	11	7	23	15	5	8
h1_chr15	3292327	12	24	23	7	12	8	11	7	22	15	5	8
h1_chr15	3292328	12	24	22	7	12	8	11	7	22	15	5	8
h1_chr15	3292329	12	23	20	7	11	6	11	7	21	15	5	8
h1_chr15	3292330	12	22	20	7	10	6	11	7	21	15	5	8
h1_chr15	3292331	12	22	19	7	10	6	11	7	21	15	5	8
h1_chr15	3292332	12	22	19	7	10	6	9	7	21	15	5	8
h1_chr15	3292333	12	22	19	7	10	5	9	7	21	15	5	8
h1_chr15	3292334	12	22	18	7	10	5	9	6	21	15	5	8
h1_chr15	3292335	12	22	17	7	10	5	9	6	21	15	5	8
h1_chr15	3292336	12	22	17	6	9	5	9	6	21	15	5	8
h1_chr15	3292337	12	21	17	6	9	5	8	6	21	15	5	7
h1_chr15	3292338	12	21	16	6	9	5	8	6	19	15	5	7
h1_chr15	3292339	12	21	16	6	9	5	8	6	18	15	5	7
h1_chr15	3292340	12	21	16	6	9	5	8	6	18	14	5	7
h1_chr15	3292341	12	21	16	6	9	5	8	6	18	13	5	7
h1_chr15	3292342	11	21	16	6	9	5	8	6	16	13	4	6
h1_chr15	3292343	10	19	16	6	9	5	8	6	15	13	4	6
h1_chr15	3292344	10	19	15	6	9	5	8	5	15	13	4	5
h1_chr15	3292345	10	18	14	6	9	5	8	5	15	13	4	5
h1_chr15	3292346	10	18	13	6	9	5	8	5	15	13	4	5
h1_chr15	3292347	9	17	13	6	9	5	8	5	15	13	4	5
h1_chr15	3292348	9	17	12	6	9	5	8	5	14	13	4	5
h1_chr15	3292349	9	15	11	6	9	5	8	5	14	13	4	5
h1_chr15	3292350	9	15	10	6	9	5	8	5	13	13	4	5
h1_chr15	3292351	9	15	10	6	9	4	8	5	13	13	4	5
h1_chr15	3292352	9	15	10	6	9	4	8	5	13	11	4	5
h1_chr15	3292353	9	15	10	6	9	4	7	4	13	11	4	5
h1_chr15	3292354	8	15	9	6	8	4	6	4	11	11	4	5
h1_chr15	3292355	7	15	9	5	8	4	6	4	11	11	4	5
h1_chr15	3292356	7	15	9	5	7	4	6	4	11	10	4	5
h1_chr15	3292357	7	13	8	5	7	3	6	4	10	10	4	5
h1_chr15	3292358	7	12	8	5	7	3	6	4	10	10	4	5
h1_chr15	3292359	7	11	8	5	7	3	6	4	10	10	4	4
h1_chr15	3292360	7	11	7	5	6	3	5	4	9	10	4	4
h1_chr15	3292361	7	10	7	5	6	3	5	4	9	10	4	4
h1_chr15	3292362	7	10	7	5	6	3	5	4	9	10	4	4
h1_chr15	3292363	6	10	7	5	6	3	4	4	9	9	3	4
h1_chr15	3292364	6	10	7	5	6	3	4	4	8	9	3	4
h1_chr15	3292365	6	9	7	5	6	2	4	4	7	9	3	4
h1_chr15	3292366	6	8	7	5	6	2	4	4	7	9	3	4
h1_chr15	3292367	5	7	6	5	6	2	4	4	7	8	3	4
h1_chr15	3292368	5	7	6	5	6	2	4	4	6	8	3	4
h1_chr15	3292369	4	7	5	4	6	2	4	4	5	8	3	4
h1_chr15	3292370	4	7	5	4	6	2	3	4	5	8	3	3
h1_chr15	3292371	4	7	5	4	6	2	3	4	4	8	3	3
h1_chr15	3292372	4	4	4	4	6	2	2	4	3	8	3	3
h1_chr15	3292373	3	3	4	4	6	2	2	2	1	8	3	3
h1_chr15	3292374	3	3	4	4	6	2	2	1	1	8	3	3
h1_chr15	3292375	3	3	3	4	5	2	1	1	1	8	3	3
h1_chr15	3292376	3	2	3	4	5	2	1	1	1	8	3	3
h1_chr15	3292377	3	2	3	4	5	2	0	1	1	8	3	3
h1_chr15	3292378	3	2	3	4	5	2	0	1	1	7	3	3
h1_chr15	3292379	3	2	3	4	5	2	0	1	1	7	3	3
h1_chr15	3292380	3	2	3	4	5	2	0	1	0	7	3	3
h1_chr15	3292381	2	2	3	4	5	2	0	1	0	7	3	3
h1_chr15	3292382	2	2	2	4	5	2	0	1	0	7	3	3
h1_chr15	3292383	2	2	2	4	4	2	0	0	0	7	3	3
h1_chr15	3292384	2	2	2	3	4	2	0	0	0	7	3	3
h1_chr15	3292385	2	2	2	3	4	2	0	0	0	7	3	3
h1_chr15	3292386	2	2	2	3	4	2	0	0	0	7	3	3
h1_chr15	3292387	1	2	2	3	4	2	0	0	0	7	2	2
h1_chr15	3292388	1	2	2	3	4	2	0	0	0	7	2	2
h1_chr15	3292389	1	2	2	3	4	2	0	0	0	7	2	1
h1_chr15	3292390	1	1	2	3	4	2	0	0	0	7	2	1
h1_chr15	3292391	1	1	2	3	4	2	0	0	0	7	2	1
h1_chr15	3292392	1	1	1	3	4	2	0	0	0	7	2	1
h1_chr15	3292393	1	1	1	3	4	2	0	0	0	7	2	1
h1_chr15	3292394	1	1	1	3	4	2	0	0	0	7	2	1
h1_chr15	3292395	1	1	1	3	4	2	0	0	0	7	2	1
h1_chr15	3292396	1	1	1	3	4	2	0	0	0	7	2	1
h1_chr15	3292397	1	1	1	3	4	2	0	0	0	7	2	1
h1_chr15	3292398	1	0	1	3	4	2	0	0	0	6	2	1
h1_chr15	3292399	1	0	1	3	4	2	0	0	0	6	2	1
h1_chr15	3292400	1	0	1	3	4	2	0	0	0	6	2	1
h1_chr15	3292401	1	0	0	3	4	2	0	0	0	6	2	1
h1_chr15	3292402	1	0	0	3	4	2	0	0	0	6	2	1
h1_chr15	3292403	1	0	0	3	4	2	0	0	0	6	2	1
h1_chr15	3292404	1	0	0	3	4	1	0	0	0	5	2	1
h1_chr15	3292405	1	0	0	3	4	1	0	0	0	5	1	1
h1_chr15	3292406	1	0	0	3	4	1	0	0	0	5	1	1
h1_chr15	3292407	1	0	0	3	3	1	0	0	0	4	1	1
h1_chr15	3292408	1	0	0	3	3	1	0	0	0	4	1	1
h1_chr15	3292409	1	0	0	3	3	1	0	0	0	4	1	1
h1_chr15	3292410	1	0	0	3	3	1	0	0	0	4	1	1
h1_chr15	3292411	1	0	0	2	3	1	0	0	0	4	1	1
h1_chr15	3292412	1	0	0	2	3	1	0	0	0	4	1	1
h1_chr15	3292413	1	0	0	2	3	1	0	0	0	3	1	1
h1_chr15	3292414	1	0	0	2	3	1	0	0	0	3	1	1
h1_chr15	3292415	1	0	0	2	3	1	0	0	0	3	1	1
h1_chr15	3292416	0	0	0	2	2	1	0	0	0	3	1	1
h1_chr15	3292417	0	0	0	2	1	1	0	0	0	3	1	1
h1_chr15	3292418	0	0	0	2	1	1	0	0	0	3	1	1
h1_chr15	3292419	0	0	0	2	1	1	2	0	0	3	1	1
h1_chr15	3292420	0	0	0	2	1	1	2	1	0	3	1	1
h1_chr15	3292421	0	0	0	2	0	1	2	1	0	3	1	1
h1_chr15	3292422	0	0	0	2	0	1	2	1	0	3	1	1
h1_chr15	3292423	0	0	0	2	0	1	2	1	0	1	1	1
h1_chr15	3292424	0	0	0	2	0	1	2	1	0	0	1	1
h1_chr15	3292425	0	0	0	2	0	0	0	0	0	0	0	1
h1_chr15	3292426	0	0	0	0	0	0	0	0	0	0	0	1
h1_chr15	3292427	0	0	0	0	0	0	0	0	0	0	0	1
h1_chr15	3292428	0	0	3	0	0	0	3	11	0	0	0	0
h1_chr15	3292429	0	1	3	0	0	0	3	12	0	0	0	0
h1_chr15	3292430	0	2	3	0	0	0	3	12	0	0	0	0
h1_chr15	3292431	1	2	3	0	0	0	3	12	0	0	0	0
h1_chr15	3292432	1	3	4	0	1	0	3	12	0	0	0	0
h1_chr15	3292433	1	4	5	0	1	0	4	12	0	0	0	0
h1_chr15	3305787	85	151	142	18	27	10	86	89	146	0	0	0	same_svim
h1_chr15	3305788	85	150	141	17	27	11	89	89	145	0	0	0	same_svim
h1_chr15	3305789	85	150	138	17	27	11	90	90	145	0	0	0	same_svim
h1_chr15	3305790	85	149	140	17	27	11	91	90	145	0	0	0	same_svim
h1_chr15	3305791	86	148	138	17	27	12	90	90	146	0	0	0	same_svim
h1_chr15	3305792	86	150	139	18	27	12	90	90	146	0	0	0	same_svim
h1_chr15	3305793	84	150	139	18	27	12	90	91	143	0	0	0	same_svim
h1_chr15	3305794	85	151	137	18	28	12	90	91	143	0	0	0	same_svim
h1_chr15	3305795	85	150	138	18	28	12	91	91	143	0	0	0	same_svim
h1_chr15	3305796	84	150	138	18	28	12	91	91	143	0	0	0	same_svim
h1_chr15	3305797	84	147	137	18	29	12	91	91	142	0	0	0	same_svim
h1_chr15	3305799	83	147	137	18	28	12	94	90	138	0	0	0	same_svim
h1_chr15	3305800	81	148	134	18	28	13	95	90	137	0	0	0	same_svim
h1_chr15	3305801	82	149	133	18	28	13	97	90	137	0	0	0	same_svim
h1_chr15	3305802	81	148	133	18	28	13	99	90	137	0	0	0	same_svim
h1_chr15	3305803	82	146	132	18	28	13	100	91	136	0	0	0	same_svim
h1_chr15	3305804	82	145	133	17	28	13	100	91	136	0	0	0	same_svim
h1_chr15	3305805	82	145	133	17	28	13	100	90	136	0	0	0	same_svim
h1_chr15	3305806	82	144	133	16	28	13	99	90	136	0	0	0	same_svim
h1_chr15	3305807	7	8	62	1	13	1	6	6	62	0	0	0
h1_chr15	3305808	80	81	91	1	13	1	98	87	129	0	0	0
h1_chr15	3305809	79	143	133	16	29	13	98	87	128	0	0	0	same_svim
h1_chr15	3305810	80	141	133	15	29	13	99	86	127	0	0	0	same_svim
h1_chr15	3305811	81	140	132	15	28	13	99	86	127	0	0	0	same_svim
h1_chr15	3305812	81	141	129	15	28	14	99	85	128	0	0	0	same_svim
h1_chr15	3305813	81	141	128	15	28	14	98	85	128	0	0	0	same_svim
h1_chr15	3305814	81	143	129	15	28	13	97	86	128	0	0	0	same_svim
h1_chr15	3305815	80	144	129	15	28	13	98	86	129	0	0	0	same_svim
h1_chr15	3305822	86	145	132	14	28	14	99	86	132	0	0	0	same_svim
h1_chr15	3305823	85	141	131	14	28	14	99	86	131	0	0	0	same_svim
h1_chr15	3305824	84	145	131	14	27	14	97	87	131	0	0	0	same_svim
h1_chr15	3305825	86	146	128	14	27	14	98	87	130	0	0	0	same_svim
h1_chr15	3305826	88	146	130	14	27	14	99	87	131	0	0	0	same_svim
h1_chr15	3305827	88	148	132	15	28	14	101	88	127	0	0	0	same_svim
h1_chr15	3305828	87	147	131	15	29	14	99	87	125	0	0	0	same_svim
h1_chr15	3305829	87	147	131	15	29	14	99	87	125	0	0	0	same_svim
h1_chr15	3305830	87	147	132	15	29	14	98	86	124	0	0	0	same_svim
h1_chr15	3305831	88	145	132	14	29	15	96	88	124	0	0	0	same_svim
h1_chr15	3305832	87	145	131	14	29	15	96	87	126	0	0	0	same_svim
h1_chr15	3305833	87	143	130	15	29	15	96	87	127	0	0	0	same_svim
h1_chr15	3305834	88	140	130	15	29	15	97	86	130	0	0	0	same_svim
h1_chr15	3305835	88	138	128	15	29	15	96	86	128	0	0	0	same_svim
h1_chr15	3305836	88	137	127	15	29	15	96	86	128	0	0	0	same_svim
h1_chr15	3305837	88	138	127	15	28	15	96	85	129	0	0	0	same_svim
h1_chr15	3305838	89	138	127	15	28	16	96	85	128	0	0	0	same_svim
h1_chr15	3305839	87	136	127	15	28	16	95	85	129	0	0	0	same_svim
h1_chr15	3305840	86	134	130	15	29	16	94	86	128	0	0	0	same_svim
h1_chr15	3305841	87	134	129	15	29	16	92	86	128	0	0	0	same_svim
h1_chr15	3305842	88	136	130	15	29	16	93	85	129	0	0	0	same_svim
h1_chr15	3305843	88	138	129	15	29	16	93	85	129	0	0	0	same_svim
h1_chr15	3305844	88	138	130	15	29	16	93	85	131	0	0	0	same_svim
h1_chr15	3305845	87	137	128	15	29	16	93	88	135	0	0	0	same_svim
h1_chr15	3305846	87	137	126	15	30	16	92	87	135	0	0	0	same_svim
h1_chr15	3305847	87	137	125	15	29	16	92	87	134	0	0	0	same_svim
h1_chr15	3305848	87	133	123	15	29	16	92	86	134	0	0	0	same_svim
h1_chr15	3305849	86	133	122	16	29	16	91	86	136	0	0	0	same_svim
h1_chr15	3305850	88	134	121	16	28	16	91	85	136	0	0	0	same_svim
h1_chr15	3305851	89	133	120	16	28	16	90	85	135	0	0	0	same_svim
h1_chr15	3305852	89	135	119	16	28	16	91	86	135	0	0	0	same_svim
h1_chr15	3305853	91	135	119	16	28	16	90	86	139	0	0	0	same_svim
h1_chr15	3305854	92	133	117	16	28	16	90	85	136	0	0	0	same_svim
h1_chr15	3305855	95	134	117	16	28	17	89	85	137	0	0	0	same_svim
h1_chr15	3305856	95	134	120	16	28	17	89	86	134	0	0	0	same_svim
h1_chr15	3305857	95	132	119	16	28	17	90	86	134	0	0	0	same_svim
h1_chr15	3305858	95	132	118	16	28	17	89	86	132	0	0	0	same_svim
h1_chr15	3305859	98	130	119	15	29	17	89	86	133	0	0	0	same_svim
h1_chr15	3305860	98	131	119	15	29	17	89	87	131	0	0	0	same_svim
h1_chr15	3305861	98	129	119	15	29	17	89	86	132	0	0	0	same_svim
h1_chr15	3305862	96	127	119	15	28	16	87	87	132	0	0	0	same_svim
h1_chr15	3305863	96	126	120	16	27	16	87	87	131	0	0	0	same_svim
h1_chr15	3305864	95	124	121	16	27	16	87	86	130	0	0	0	same_svim
h1_chr15	3305865	95	123	122	15	27	16	88	85	129	0	0	0	same_svim
h1_chr15	3305866	95	123	123	15	27	16	87	87	131	0	0	0	same_svim
h1_chr15	3305867	96	122	125	15	27	16	88	86	132	0	0	0	same_svim
h1_chr15	3305868	95	120	123	15	27	16	89	86	130	0	0	0	same_svim
h1_chr15	3305869	95	119	124	15	27	16	88	86	129	0	0	0	same_svim
h1_chr15	3305870	95	119	124	15	27	16	88	86	129	0	0	0	same_svim
h1_chr15	3305871	94	120	125	14	27	16	89	88	129	0	0	0	same_svim
h1_chr15	3305872	95	120	124	14	27	16	90	89	129	0	0	0	same_svim
h1_chr15	3305873	95	120	124	14	27	17	89	89	129	0	0	0	same_svim
h1_chr15	3305874	95	120	124	15	28	16	88	89	131	0	0	0	same_svim
h1_chr15	3305875	95	118	124	15	27	16	89	89	132	0	0	0	same_svim
h1_chr15	3305876	96	119	124	15	27	16	87	89	130	0	0	0	same_svim
h1_chr15	3305877	92	117	126	16	27	16	90	89	130	0	0	0	same_svim
h1_chr15	3305878	92	117	126	16	27	16	89	89	131	0	0	0	same_svim
h1_chr15	3305879	93	116	126	15	27	16	88	89	133	0	0	0	same_svim
h1_chr15	3305880	94	117	125	15	27	16	89	90	135	0	0	0	same_svim
h1_chr15	3305881	93	116	125	15	29	16	88	89	134	0	0	0	same_svim
h1_chr15	3305882	93	115	123	15	28	16	88	91	133	0	0	0	same_svim
h1_chr15	3305883	92	115	123	15	29	16	88	90	132	0	0	0	same_svim
h1_chr15	3305884	91	114	123	16	29	16	89	90	130	0	0	0	same_svim
h1_chr15	3305885	88	116	122	16	29	16	88	90	129	0	0	0	same_svim
h1_chr15	3305886	88	116	123	16	28	15	88	90	130	0	0	0	same_svim
h1_chr15	3305887	88	116	122	16	28	15	90	90	129	0	0	0	same_svim
h1_chr15	3305888	87	116	122	16	28	15	90	89	129	0	0	0	same_svim
h1_chr15	3305889	89	116	122	16	30	16	89	89	128	0	0	0	same_svim
h1_chr15	3305890	89	117	121	16	30	16	89	88	127	0	0	0	same_svim
h1_chr15	3305891	89	118	123	16	30	15	89	86	127	0	0	0	same_svim
h1_chr15	3305892	90	117	122	16	30	15	91	85	128	0	0	0	same_svim
h1_chr15	3305893	88	116	122	15	29	15	89	85	127	0	0	0	same_svim
h1_chr15	3305894	89	113	122	15	30	15	91	85	126	0	0	0	same_svim
h1_chr15	3305895	88	110	123	13	28	15	91	86	127	0	0	0	same_svim
h1_chr15	3305896	88	110	123	13	27	15	91	85	126	0	0	0	same_svim
h1_chr15	3305897	89	112	124	14	28	16	91	85	126	0	0	0	same_svim
h1_chr15	3305898	89	112	124	14	29	16	91	87	124	0	0	0	same_svim
h1_chr15	3305899	91	113	124	14	29	16	91	87	124	0	0	0	same_svim
h1_chr15	3305900	91	114	126	14	29	16	88	87	124	0	0	0	same_svim
h1_chr15	3305901	90	114	126	15	28	16	87	87	125	0	0	0	same_svim
h1_chr15	3305902	91	113	127	15	28	16	87	86	125	0	0	0	same_svim
h1_chr15	3305903	91	112	127	15	28	16	86	86	123	0	0	0	same_svim
h1_chr15	3305904	92	108	128	16	27	16	86	86	124	0	0	0	same_svim
h1_chr15	3305905	92	108	129	16	27	16	86	86	123	0	0	0	same_svim
h1_chr15	3305906	93	107	129	16	26	16	85	86	123	0	0	0	same_svim
h1_chr15	3305907	95	109	128	16	26	16	86	86	125	0	0	0	same_svim
h1_chr15	3305908	95	108	128	16	26	16	88	85	127	0	0	0	same_svim
h1_chr15	3305909	95	108	127	16	26	16	87	84	125	0	0	0	same_svim
h1_chr15	3305910	95	108	128	16	26	16	87	82	124	0	0	0	same_svim
h1_chr15	3305911	95	106	126	16	26	15	87	81	124	0	0	0	same_svim
h1_chr15	3305912	94	107	126	17	25	15	87	81	123	0	0	0	same_svim
h1_chr15	3305913	94	95	117	17	25	15	88	81	109	0	0	0	same_svim
h1_chr15	3305914	93	95	117	16	26	14	87	80	108	0	0	0	same_svim
h1_chr15	3305915	92	94	116	16	26	14	87	80	109	0	0	0	same_svim
h1_chr15	3305916	92	93	115	16	26	15	87	79	109	0	0	0	same_svim
h1_chr15	3305917	92	92	115	16	26	15	88	79	107	0	0	0	same_svim
h1_chr15	3305918	92	91	113	15	26	15	87	79	107	0	0	0	same_svim
h1_chr15	3305919	92	91	112	15	26	15	87	79	106	0	0	0	same_svim
h1_chr15	3305920	92	90	111	17	26	16	86	80	105	0	0	0	same_svim
h1_chr15	3305921	92	90	113	17	27	16	89	80	105	0	0	0	same_svim
h1_chr15	3305922	92	90	116	17	27	16	89	80	106	0	0	0	same_svim
h1_chr15	3305923	92	90	116	17	26	17	90	81	106	0	0	0	same_svim
h1_chr15	3305924	94	90	112	17	26	17	90	82	107	0	0	0	same_svim
h1_chr15	3305925	95	92	112	17	26	17	89	82	107	0	0	0	same_svim
h1_chr15	3305926	95	92	113	17	27	18	89	83	107	0	0	0	same_svim
h1_chr15	3305927	95	93	113	18	27	18	87	83	108	0	0	0	same_svim
h1_chr15	3305928	93	93	111	18	28	18	89	83	109	0	0	0	same_svim
h1_chr15	3305929	93	95	112	18	28	18	88	80	110	0	0	0	same_svim
h1_chr15	3305930	93	95	112	17	29	18	89	80	111	0	0	0	same_svim
h1_chr15	3305931	91	95	111	17	29	17	90	80	111	0	0	0	same_svim
h1_chr15	3305932	91	96	112	17	29	17	90	80	112	0	0	0	same_svim
h1_chr15	3305933	92	97	111	16	30	17	90	81	113	0	0	0	same_svim
h1_chr15	3305934	92	95	111	16	30	17	90	81	113	0	0	0	same_svim
h1_chr15	3305935	92	98	110	16	30	18	90	81	110	0	0	0	same_svim
h1_chr15	3305936	91	96	109	16	30	18	90	82	113	0	0	0	same_svim
h1_chr15	3305937	91	97	108	17	30	18	89	82	111	0	0	0	same_svim
h1_chr15	3305938	93	98	108	17	30	18	88	82	112	0	0	0	same_svim
h1_chr15	3305939	93	98	110	17	30	18	86	82	112	0	0	0	same_svim
h1_chr15	3305940	94	99	109	17	30	19	88	81	112	0	0	0	same_svim
h1_chr15	3305941	93	98	108	17	30	18	87	81	114	0	0	0	same_svim
h1_chr15	3305942	92	101	110	17	30	19	87	81	116	0	0	0	same_svim
h1_chr15	3305943	93	102	109	17	30	19	86	82	117	0	0	0	same_svim
h1_chr15	3305944	94	99	108	17	31	18	89	79	117	0	0	0	same_svim
h1_chr15	3305945	93	98	110	16	30	18	90	79	118	0	0	0	same_svim
h1_chr15	3305946	93	98	110	17	30	18	89	79	118	0	0	0	same_svim
h1_chr15	3305947	95	98	112	17	30	18	90	78	115	0	0	0	same_svim
h1_chr15	3305948	96	98	112	18	29	18	90	79	115	0	0	0	same_svim
h1_chr15	3305949	95	99	112	18	29	18	89	78	117	0	0	0	same_svim
h1_chr15	3305950	95	97	111	19	28	18	87	78	118	0	0	0	same_svim
h1_chr15	3305951	96	98	114	19	28	18	89	78	118	0	0	0	same_svim
h1_chr15	3305952	97	100	112	19	28	18	87	78	117	0	0	0	same_svim
h1_chr15	3305953	97	99	111	19	28	17	85	78	117	0	0	0	same_svim
h1_chr15	3305954	96	99	113	19	28	17	85	82	118	0	0	0	same_svim
h1_chr15	3305955	96	99	114	19	29	17	85	82	120	0	0	0	same_svim
h1_chr15	3305956	97	100	114	19	29	17	84	82	120	0	0	0	same_svim
h1_chr15	3305957	96	99	116	19	29	17	84	80	122	0	0	0	same_svim
h1_chr15	3305958	96	99	116	19	28	18	83	80	120	0	0	0	same_svim
h1_chr15	3305959	97	98	113	19	28	18	83	80	119	0	0	0	same_svim
h1_chr15	3305960	96	97	113	19	28	18	83	79	119	0	0	0	same_svim
h1_chr15	3305961	94	98	116	19	29	19	82	79	119	0	0	0	same_svim
h1_chr15	3305962	92	97	117	19	29	19	82	79	118	0	0	0	same_svim
h1_chr15	3305963	92	97	122	19	29	18	80	79	117	0	0	0	same_svim
h1_chr15	3305964	92	95	122	19	29	18	81	81	119	0	0	0	same_svim
h1_chr15	3305965	91	95	123	19	30	18	81	80	117	0	0	0	same_svim
h1_chr15	3305966	92	95	122	19	30	18	82	80	118	0	0	0	same_svim
h1_chr15	3305967	92	95	123	19	30	18	81	80	121	0	0	0	same_svim
h1_chr15	3305968	91	95	124	20	30	17	81	80	121	0	0	0	same_svim
h1_chr15	3305969	92	96	125	20	30	17	82	80	121	0	0	0	same_svim
h1_chr15	3305970	93	97	125	20	30	17	82	80	121	0	0	0	same_svim
h1_chr15	3305971	90	97	126	20	30	17	83	80	120	0	0	0	same_svim
h1_chr15	3305972	91	100	126	21	30	18	82	82	120	0	0	0	same_svim
h1_chr15	3305973	92	100	127	21	30	18	83	82	120	0	0	0	same_svim
h1_chr15	3305974	92	95	127	22	30	18	83	82	120	0	0	0	same_svim
h1_chr15	3305975	90	92	127	22	30	19	83	82	120	0	0	0	same_svim
h1_chr15	3305976	89	93	125	22	30	19	82	80	119	0	0	0	same_svim
h1_chr15	3305977	90	90	123	22	30	19	80	78	119	0	0	0	same_svim
h1_chr15	3305978	90	90	124	21	30	19	80	79	118	0	0	0	same_svim
h1_chr15	3305979	90	89	125	21	29	19	81	79	117	0	0	0	same_svim
h1_chr15	3305980	90	88	125	21	29	19	81	77	118	0	0	0	same_svim
h1_chr15	3305981	89	88	124	21	29	19	81	77	118	0	0	0	same_svim
h1_chr15	3305982	89	89	124	21	28	18	80	76	119	0	0	0	same_svim
h1_chr15	3305983	90	90	124	21	28	18	81	76	118	0	0	0	same_svim
h1_chr15	3305984	89	90	125	20	28	18	80	75	116	0	0	0	same_svim
h1_chr15	3305985	89	92	122	20	28	19	80	72	118	0	0	0	same_svim
h1_chr15	3305986	89	92	123	20	28	19	80	72	119	0	0	0	same_svim
h1_chr15	3305987	88	91	122	20	29	19	81	73	118	0	0	0	same_svim
h1_chr15	3305988	89	93	123	20	29	19	80	74	118	0	0	0	same_svim
h1_chr15	3305989	90	93	124	20	29	18	82	76	117	0	0	0	same_svim
h1_chr15	3305990	91	92	125	20	29	18	82	76	117	0	0	0	same_svim
h1_chr15	3305991	90	91	125	20	28	18	84	76	118	0	0	0	same_svim
h1_chr15	3305992	90	90	124	20	28	18	83	76	118	0	0	0	same_svim
h1_chr15	3305993	90	88	124	20	28	18	83	75	119	0	0	0	same_svim
h1_chr15	3305994	90	88	124	20	29	18	81	75	118	0	0	0	same_svim
h1_chr15	3305995	91	88	124	20	30	19	82	77	116	0	0	0	same_svim
h1_chr15	3305996	91	90	126	21	30	19	83	76	114	0	0	0	same_svim
h1_chr15	3305997	91	90	125	21	29	19	84	76	116	0	0	0	same_svim
h1_chr15	3305998	91	90	123	21	29	19	88	77	118	0	0	0	same_svim
h1_chr15	3305999	92	90	122	21	29	19	89	80	116	0	0	0	same_svim
h1_chr15	3306000	90	89	122	20	28	19	89	80	116	0	0	0	same_svim
h1_chr15	3306001	89	89	123	20	28	19	88	81	117	0	0	0	same_svim
h1_chr15	3306002	89	87	126	20	28	19	87	81	117	0	0	0	same_svim
h1_chr15	3306003	86	87	127	20	28	19	89	81	115	0	0	0	same_svim
h1_chr15	3306004	85	88	128	20	28	19	89	81	115	0	0	0	same_svim
h1_chr15	3306005	82	87	128	20	28	19	89	81	114	0	0	0	same_svim
h1_chr15	3306006	82	87	125	20	28	18	89	81	114	0	0	0	same_svim
h1_chr15	3306007	83	87	124	20	28	18	87	82	113	0	0	0	same_svim
h1_chr15	3306008	84	89	125	20	28	18	87	82	114	0	0	0	same_svim
h1_chr15	3306009	82	89	123	20	28	18	87	84	112	0	0	0	same_svim
h1_chr15	3306010	82	90	122	20	27	18	88	83	113	0	0	0	same_svim
h1_chr15	3306011	80	89	122	20	28	18	88	82	114	0	0	0	same_svim
h1_chr15	3306012	80	89	121	20	29	18	88	82	115	0	0	0	same_svim
h1_chr15	3306013	80	88	120	21	30	18	86	82	115	0	0	0	same_svim
h1_chr15	3306014	40	88	120	20	30	19	86	83	115	0	0	0	same_svim
h1_chr15	3306015	40	88	121	20	30	19	85	83	118	0	0	0	same_svim
h1_chr15	3306016	41	88	121	20	32	19	84	84	115	0	0	0	same_svim
h1_chr15	3306017	42	88	118	19	32	19	83	84	114	0	0	0	same_svim
h1_chr15	3306018	43	89	118	19	32	19	82	84	114	0	0	0	same_svim
h1_chr15	3306019	43	89	117	20	32	20	82	84	113	0	0	0	same_svim
h1_chr15	3306020	44	89	116	20	32	20	83	84	114	0	0	0	same_svim
h1_chr15	3306021	89	88	115	20	32	20	83	84	112	0	0	0	same_svim
h1_chr15	3306022	89	95	120	20	31	20	82	83	119	0	0	0	same_svim
h1_chr15	3306023	90	94	120	20	31	20	82	83	118	0	0	0	same_svim
h1_chr15	3306024	91	94	121	20	32	19	82	82	117	0	0	0	same_svim
h1_chr15	3306025	91	95	120	19	30	19	81	82	117	0	0	0	same_svim
h1_chr15	3306026	91	95	120	19	30	18	81	82	117	0	0	0	same_svim
h1_chr15	3306027	91	96	119	19	30	18	78	82	119	0	0	0	same_svim
h1_chr15	3306028	92	98	119	18	31	18	80	83	118	0	0	0	same_svim
h1_chr15	3306029	91	98	120	18	32	18	80	83	116	0	0	0	same_svim
h1_chr15	3306030	91	98	121	18	32	18	80	82	113	0	0	0	same_svim
h1_chr15	3306031	91	99	122	18	33	18	78	82	115	0	0	0	same_svim
h1_chr15	3306032	92	101	123	18	31	18	78	83	117	0	0	0	same_svim
h1_chr15	3306033	91	101	122	18	31	19	77	83	117	0	0	0	same_svim
h1_chr15	3306034	91	101	122	18	30	19	76	83	116	0	0	0	same_svim
h1_chr15	3306035	92	99	123	17	30	20	76	83	116	0	0	0	same_svim
h1_chr15	3306036	92	101	122	17	31	20	76	81	116	0	0	0	same_svim
h1_chr15	3306037	93	99	122	17	31	20	75	81	116	0	0	0	same_svim
h1_chr15	3306038	93	100	123	17	31	20	75	80	117	0	0	0	same_svim
h1_chr15	3306039	93	101	124	17	31	20	76	79	117	0	0	0	same_svim
h1_chr15	3306040	93	102	126	17	29	19	77	79	117	0	0	0	same_svim
h1_chr15	3306041	93	96	120	17	29	19	76	78	112	0	0	0	same_svim
h1_chr15	3306042	93	97	121	17	29	19	74	78	111	0	0	0	same_svim
h1_chr15	3306043	96	98	121	17	29	19	74	78	111	0	0	0	same_svim
h1_chr15	3306044	93	97	121	17	30	20	73	78	112	0	0	0	same_svim
h1_chr15	3306045	93	97	119	17	28	19	73	77	111	0	0	0	same_svim
h1_chr15	3306046	92	96	120	17	28	19	74	77	113	0	0	0	same_svim
h1_chr15	3306047	91	96	120	17	28	19	75	77	114	0	0	0	same_svim
h1_chr15	3306048	91	97	120	16	28	19	76	77	113	0	0	0	same_svim
h1_chr15	3306049	91	97	120	16	28	19	77	77	113	0	0	0	same_svim
h1_chr15	3306050	90	95	118	16	28	19	78	77	113	0	0	0	same_svim
h1_chr15	3306051	90	96	118	16	29	19	79	79	112	0	0	0	same_svim
h1_chr15	3306052	89	96	117	15	29	19	79	79	112	0	0	0	same_svim
h1_chr15	3306053	89	97	117	15	29	19	79	79	112	0	0	0	same_svim
h1_chr15	3306054	90	98	115	15	28	19	79	79	112	0	0	0	same_svim
h1_chr15	3306055	90	98	115	14	27	19	79	79	112	0	0	0	same_svim
h1_chr15	3306056	89	98	116	14	27	19	79	79	113	0	0	0	same_svim
h1_chr15	3306057	89	96	118	14	27	19	79	80	112	0	0	0	same_svim
h1_chr15	3306058	89	96	118	15	27	19	77	81	111	0	0	0	same_svim
h1_chr15	3306059	88	96	119	15	27	19	77	81	112	0	0	0	same_svim
h1_chr15	3306060	88	97	120	15	27	19	79	81	112	0	0	0	same_svim
h1_chr15	3306061	88	97	120	15	27	19	78	81	111	0	0	0	same_svim
h1_chr15	3306062	89	96	119	15	27	19	78	81	112	0	0	0	same_svim
h1_chr15	3306063	88	96	118	14	27	19	77	81	112	0	0	0	same_svim
h1_chr15	3306064	89	97	118	14	27	19	77	82	113	0	0	0	same_svim
h1_chr15	3306065	89	98	117	14	26	19	79	82	113	0	0	0	same_svim
h1_chr15	3306066	89	100	118	14	26	19	80	81	113	0	0	0	same_svim
h1_chr15	3306067	89	102	117	14	26	18	78	81	113	0	0	0	same_svim
h1_chr15	3306068	90	103	118	14	26	18	80	81	113	0	0	0	same_svim
h1_chr15	3306069	90	103	118	14	27	18	80	78	113	0	0	0	same_svim
h1_chr15	3306070	90	103	117	14	27	18	81	78	112	0	0	0	same_svim
h1_chr15	3306071	90	103	115	12	27	17	78	77	112	0	0	0	same_svim
h1_chr15	3306072	90	102	116	12	26	17	77	78	112	0	0	0	same_svim
h1_chr15	3306073	90	101	116	12	26	17	78	78	112	0	0	0	same_svim
h1_chr15	3306074	90	103	116	12	26	16	78	78	110	0	0	0	same_svim
h1_chr15	3306075	90	103	114	12	26	16	79	79	109	0	0	0	same_svim
h1_chr15	3306076	90	103	113	12	26	16	79	79	109	0	0	0	same_svim
h1_chr15	3306077	90	102	112	12	25	14	81	79	109	0	0	0	same_svim
h1_chr15	3306078	87	102	111	11	25	14	79	79	110	0	0	0	same_svim
h1_chr15	3306079	89	100	111	11	25	14	81	79	109	0	0	0	same_svim
h1_chr15	3306080	88	102	111	11	25	14	81	79	109	0	0	0	same_svim
h1_chr15	3306081	88	103	112	11	24	14	83	79	109	0	0	0	same_svim
h1_chr15	3306082	87	102	111	11	24	14	83	77	108	0	0	0	same_svim
h1_chr15	3306083	87	101	112	11	24	15	84	77	107	0	0	0	same_svim
h1_chr15	3306084	88	101	113	11	23	15	84	77	107	0	0	0	same_svim
h1_chr15	3306085	89	99	113	11	23	15	83	77	107	0	0	0	same_svim
h1_chr15	3306086	89	100	113	11	24	15	84	77	104	0	0	0	same_svim
h1_chr15	3306087	89	99	116	11	26	15	85	77	104	0	0	0	same_svim
h1_chr15	3306088	88	99	116	10	26	15	86	78	103	0	0	0	same_svim
h1_chr15	3306089	88	99	115	10	26	15	87	79	105	0	0	0	same_svim
h1_chr15	3306090	86	98	115	10	26	15	84	79	107	0	0	0	same_svim
h1_chr15	3306091	85	99	115	10	26	14	86	78	105	0	0	0	same_svim
h1_chr15	3306092	86	96	114	10	27	14	87	79	103	0	0	0	same_svim
h1_chr15	3306093	89	95	114	10	27	13	87	79	102	0	0	0	same_svim
h1_chr15	3306094	89	95	114	10	27	13	84	78	101	0	0	0	same_svim
h1_chr15	3306095	88	94	112	10	26	13	84	79	99	0	0	0	same_svim
h1_chr15	3306096	91	96	113	10	26	13	84	77	98	0	0	0	same_svim
h1_chr15	3306097	91	97	111	9	26	15	87	79	98	0	0	0	same_svim
h1_chr15	3306098	91	100	111	9	26	15	89	78	97	0	0	0	same_svim
h1_chr15	3306099	93	99	111	8	26	15	89	78	95	0	0	0	same_svim
h1_chr15	3306100	92	99	113	8	26	15	89	78	95	0	0	0	same_svim
h1_chr15	3306101	94	99	111	7	26	15	86	78	96	0	0	0	same_svim
h1_chr15	3306102	95	98	111	7	26	15	88	77	99	0	0	0	same_svim
h1_chr15	3306103	96	98	111	7	26	15	89	77	99	0	0	0	same_svim
h1_chr15	3306104	96	97	108	7	26	15	89	78	98	0	0	0	same_svim
h1_chr15	3306105	96	99	107	7	26	15	89	78	96	0	0	0	same_svim
h1_chr15	3306106	96	98	108	7	26	15	90	78	96	0	0	0	same_svim
h1_chr15	3306107	96	98	108	7	26	15	91	77	95	0	0	0	same_svim
h1_chr15	3306108	95	98	108	7	27	15	92	77	95	0	0	0	same_svim
h1_chr15	3306109	94	98	107	7	27	15	92	78	94	0	0	0	same_svim
h1_chr15	3306110	94	99	107	7	28	15	93	77	94	0	0	0	same_svim
h1_chr15	3306111	94	98	104	7	29	15	96	77	94	0	0	0	same_svim
h1_chr15	3306112	94	98	102	8	28	14	95	78	99	0	0	0	same_svim
h1_chr15	3306113	95	97	98	8	28	14	95	77	99	0	0	0	same_svim
h1_chr15	3306114	95	97	97	8	28	15	94	77	97	0	0	0	same_svim
h1_chr15	3306115	95	96	95	8	28	16	94	77	98	0	0	0	same_svim
h1_chr15	3306116	95	95	96	8	27	16	94	78	96	0	0	0	same_svim
h1_chr15	3306117	96	95	94	8	27	16	94	75	94	0	0	0	same_svim
h1_chr15	3306118	96	95	94	8	27	16	94	75	94	0	0	0	same_svim
h1_chr15	3306119	96	91	92	6	27	15	93	74	95	0	0	0	same_svim
h1_chr15	3306120	95	91	94	6	27	15	94	74	97	0	0	0	same_svim
h1_chr15	3306121	95	91	95	6	28	15	93	75	97	0	0	0	same_svim
h1_chr15	3306122	94	92	95	6	28	16	93	76	100	0	0	0	same_svim
h1_chr15	3306123	94	92	95	6	28	16	91	76	101	0	0	0	same_svim
h1_chr15	3306124	97	92	95	6	28	16	91	77	102	0	0	0	same_svim
h1_chr15	3306125	98	92	95	5	28	16	90	78	102	0	0	0
h1_chr15	3306126	98	93	95	6	28	15	90	78	103	0	0	0	same_svim
h1_chr15	3306127	97	93	95	6	28	15	91	78	103	0	0	0	same_svim
h1_chr15	3306128	97	93	94	6	28	15	92	78	103	0	0	0	same_svim
h1_chr15	3306129	97	94	94	6	27	15	91	78	103	0	0	0	same_svim
h1_chr15	3306130	100	95	93	6	27	15	91	78	103	0	0	0	same_svim
h1_chr15	3306131	100	95	94	6	28	15	91	77	103	0	0	0	same_svim
h1_chr15	3306132	102	94	96	6	28	15	93	77	100	0	0	0	same_svim
h1_chr15	3306133	103	94	94	6	28	15	93	77	101	0	0	0	same_svim
h1_chr15	3306134	104	95	94	6	28	15	93	78	100	0	0	0	same_svim
h1_chr15	3306135	103	92	94	6	28	15	92	78	98	0	0	0	same_svim
h1_chr15	3306136	102	94	94	6	29	14	92	78	98	0	0	0	same_svim
h1_chr15	3306137	103	94	94	6	29	14	92	78	97	0	0	0	same_svim
h1_chr15	3306138	101	92	94	7	28	14	92	78	98	0	0	0	same_svim
h1_chr15	3306139	101	94	93	9	28	14	92	78	97	0	0	0	same_svim
h1_chr15	3306140	101	95	91	9	28	14	92	78	99	0	0	0	same_svim
h1_chr15	3306141	101	96	90	9	29	14	90	80	98	0	0	0	same_svim
h1_chr15	3306142	102	95	90	9	30	14	90	80	100	0	0	0	same_svim
h1_chr15	3306143	101	97	90	9	30	14	90	81	98	0	0	0	same_svim
h1_chr15	3306144	101	98	90	9	30	14	90	82	97	0	0	0	same_svim
h1_chr15	3306145	100	99	91	9	29	14	90	82	98	0	0	0	same_svim
h1_chr15	3306146	102	97	90	9	28	13	89	81	98	0	0	0	same_svim
h1_chr15	3306147	101	99	92	8	29	13	90	81	100	0	0	0	same_svim
h1_chr15	3306148	101	100	92	8	29	13	86	81	98	0	0	0	same_svim
h1_chr15	3306149	100	100	93	8	30	13	85	79	98	0	0	0	same_svim
h1_chr15	3306150	100	101	94	8	30	13	86	79	98	0	0	0	same_svim
h1_chr15	3306151	101	101	93	8	30	13	87	80	97	0	0	0	same_svim
h1_chr15	3306152	101	100	90	8	30	13	89	81	98	0	0	0	same_svim
h1_chr15	3306153	102	103	90	8	30	13	87	81	98	0	0	0	same_svim
h1_chr15	3306154	102	104	89	8	31	14	89	81	99	0	0	0	same_svim
h1_chr15	3306155	102	104	89	8	31	14	90	83	100	0	0	0	same_svim
h1_chr15	3306156	101	104	89	8	31	14	91	82	101	0	0	0	same_svim
h1_chr15	3306157	101	105	91	8	31	14	91	82	100	0	0	0	same_svim
h1_chr15	3306158	101	103	91	8	31	14	92	83	100	0	0	0	same_svim
h1_chr15	3306159	100	103	92	8	31	14	92	83	100	0	0	0	same_svim
h1_chr15	3306160	100	101	92	8	32	14	91	84	98	0	0	0	same_svim
h1_chr15	3306161	100	101	91	8	32	14	91	84	98	0	0	0	same_svim
h1_chr15	3306162	99	101	92	8	31	14	92	84	100	0	0	0	same_svim
h1_chr15	3306163	98	100	92	8	32	14	92	85	101	0	0	0	same_svim
h1_chr15	3306164	99	100	91	7	31	14	92	86	102	0	0	0	same_svim
h1_chr15	3306165	98	102	91	8	31	13	92	88	99	0	0	0	same_svim
h1_chr15	3306166	98	102	90	8	31	13	92	89	100	0	0	0	same_svim
h1_chr15	3306167	97	103	92	8	29	14	92	91	100	0	0	0	same_svim
h1_chr15	3306168	96	102	91	10	29	14	93	91	100	0	0	0	same_svim
h1_chr15	3306169	97	103	92	10	29	14	92	91	101	0	0	0	same_svim
h1_chr15	3306170	96	104	91	9	29	13	92	91	101	0	0	0	same_svim
h1_chr15	3306171	95	105	91	9	29	13	91	90	101	0	0	0	same_svim
h1_chr15	3306172	96	105	91	9	29	13	93	89	101	0	0	0	same_svim
h1_chr15	3306173	96	106	91	9	31	13	94	89	101	0	0	0	same_svim
h1_chr15	3306174	94	106	90	9	31	13	95	87	101	0	0	0	same_svim
h1_chr15	3306175	94	105	90	9	30	13	96	87	100	0	0	0	same_svim
h1_chr15	3306176	95	104	90	9	30	14	96	87	101	0	0	0	same_svim
h1_chr15	3306177	95	103	87	9	30	15	96	86	101	0	0	0	same_svim
h1_chr15	3306178	93	101	88	9	30	15	94	86	101	0	0	0	same_svim
h1_chr15	3306179	92	100	87	9	29	15	94	85	101	0	0	0	same_svim
h1_chr15	3306180	93	101	89	9	28	15	94	85	101	0	0	0	same_svim
h1_chr15	3306181	96	100	87	9	28	15	96	85	103	0	0	0	same_svim
h1_chr15	3306182	97	98	87	9	28	15	97	85	102	0	0	0	same_svim
h1_chr15	3306183	99	98	87	9	28	15	99	85	104	0	0	0	same_svim
h1_chr15	3306184	100	98	88	9	28	14	99	86	105	0	0	0	same_svim
h1_chr15	3306185	99	99	88	9	28	14	100	86	104	0	0	0	same_svim
h1_chr15	3306186	100	97	88	11	28	13	100	86	104	0	0	0	same_svim
h1_chr15	3306187	100	97	89	11	27	13	102	85	105	0	0	0	same_svim
h1_chr15	3306188	100	97	87	11	27	13	102	85	106	0	0	0	same_svim
h1_chr15	3306216	105	99	87	12	30	15	98	84	109	0	0	0	same_svim
h1_chr15	3306217	105	98	87	12	30	15	98	84	109	0	0	0	same_svim
h1_chr15	3306218	104	97	87	12	30	15	96	85	110	0	0	0	same_svim
h1_chr15	3306219	104	96	87	12	30	16	96	85	110	0	0	0	same_svim
h1_chr15	3306220	105	96	90	12	29	16	95	86	110	0	0	0	same_svim
h1_chr15	3306221	108	96	91	12	29	16	95	87	110	0	0	0	same_svim
h1_chr15	3306222	110	97	90	13	29	16	95	87	110	0	0	0	same_svim
h1_chr15	3306232	109	92	93	13	34	17	91	85	110	0	0	0	same_svim
h1_chr15	3306233	109	92	92	13	34	17	90	86	110	0	0	0	same_svim
h1_chr15	3306234	108	92	91	13	35	16	90	85	109	0	0	0	same_svim
h1_chr15	3306235	108	92	92	13	35	16	91	86	111	0	0	0	same_svim
h1_chr15	3306236	108	92	92	13	35	16	90	88	113	0	0	0	same_svim
h1_chr15	3306237	108	93	90	13	34	15	90	88	112	0	0	0	same_svim
h1_chr15	3306249	105	95	90	14	34	13	86	92	118	0	0	0	same_svim
h1_chr15	3306250	106	96	89	14	34	13	86	89	118	0	0	0	same_svim
h1_chr15	3306251	104	96	88	14	34	13	88	89	117	0	0	0	same_svim
h1_chr15	3306252	103	95	89	14	34	13	86	91	114	0	0	0	same_svim
h1_chr15	3306253	103	95	89	14	34	13	87	91	114	0	0	0	same_svim
h1_chr15	3306254	103	96	90	14	34	15	86	91	114	0	0	0	same_svim
h1_chr15	3306255	102	94	91	14	34	15	86	92	113	0	0	0	same_svim
h1_chr15	3306256	102	95	93	14	34	15	86	92	113	0	0	0	same_svim
h1_chr15	3306257	103	95	91	14	33	16	86	92	112	0	0	0	same_svim
h1_chr15	3306258	104	95	91	14	33	16	86	91	112	0	0	0	same_svim
h1_chr15	3306259	103	97	92	14	32	17	87	91	113	0	0	0	same_svim
h1_chr15	3306260	105	98	92	14	32	16	85	89	114	0	0	0	same_svim
h1_chr15	3306261	105	98	92	14	32	16	82	89	113	0	0	0	same_svim
h1_chr15	3306262	106	98	92	14	31	17	83	89	109	0	0	0	same_svim
h1_chr15	3306263	104	98	91	13	31	17	83	89	110	0	0	0	same_svim
h1_chr15	3306264	106	98	91	13	31	17	83	89	111	0	0	0	same_svim
h1_chr15	3306265	106	98	93	13	32	16	83	88	110	0	0	0	same_svim
h1_chr15	3306266	105	100	94	13	33	15	83	88	110	0	0	0	same_svim
h1_chr15	3306267	106	98	95	13	33	15	84	89	110	0	0	0	same_svim
h1_chr15	3306268	106	96	94	13	33	15	84	89	110	0	0	0	same_svim
h1_chr15	3306269	105	96	94	13	33	15	84	89	109	0	0	0	same_svim
h1_chr15	3306270	105	95	92	13	33	15	83	89	106	0	0	0	same_svim
h1_chr15	3306271	105	94	90	13	33	15	83	89	106	0	0	0	same_svim
h1_chr15	3306272	104	94	90	13	32	15	82	89	103	0	0	0	same_svim
h1_chr15	3306273	97	90	88	12	32	14	79	89	99	0	0	0	same_svim
h1_chr15	3306274	94	90	89	12	32	14	79	89	98	0	0	0	same_svim
h1_chr15	3306275	98	94	97	12	33	14	85	92	107	0	0	0	same_svim
h1_chr15	3306276	99	94	97	12	34	14	87	94	107	0	0	0	same_svim
h1_chr15	3306277	100	94	97	12	34	14	87	95	109	0	0	0	same_svim
h1_chr15	3306278	100	95	97	12	35	14	89	96	109	0	0	0	same_svim
h1_chr15	3306279	100	96	97	12	35	14	90	96	109	0	0	0	same_svim
h1_chr15	3306280	100	96	97	12	35	14	90	96	109	0	0	0	same_svim
h1_chr15	3306281	98	98	96	12	34	14	90	97	110	0	0	0	same_svim
h1_chr15	3306282	98	98	96	12	34	14	89	96	111	0	0	0	same_svim
h1_chr15	3306283	97	97	97	12	35	14	89	96	111	0	0	0	same_svim
h1_chr15	3306284	99	97	99	12	35	14	89	98	113	0	0	0	same_svim
h1_chr15	3306285	102	95	99	12	35	14	89	100	113	0	0	0	same_svim
h1_chr15	3306286	102	95	98	12	34	14	87	100	114	0	0	0	same_svim
h1_chr15	3306287	103	95	97	12	35	14	87	100	113	0	0	0	same_svim
h1_chr15	3306288	104	93	98	11	35	14	88	100	113	0	0	0	same_svim
h1_chr15	3306289	105	92	99	9	37	14	88	100	113	0	0	0	same_svim
h1_chr15	3306290	105	92	100	11	37	14	90	100	113	0	0	0	same_svim
h1_chr15	3306291	103	92	100	11	36	14	90	100	112	0	0	0	same_svim
h1_chr15	3306292	103	91	100	11	36	14	90	101	113	0	0	0	same_svim
h1_chr15	3306293	104	92	100	11	36	14	90	101	114	0	0	0	same_svim
h1_chr15	3306294	106	92	100	11	37	14	89	101	114	0	0	0	same_svim
h1_chr15	3306295	104	94	99	11	37	15	90	103	115	0	0	0	same_svim
h1_chr15	3306296	105	94	97	11	37	15	88	105	111	0	0	0	same_svim
h1_chr15	3306297	105	95	97	11	37	15	89	105	111	0	0	0	same_svim
h1_chr15	3306298	107	94	96	11	36	15	90	105	111	0	0	0	same_svim
h1_chr15	3306299	108	93	96	11	36	15	89	105	112	0	0	0	same_svim
h1_chr15	3306300	108	93	96	11	35	16	90	105	113	0	0	0	same_svim
h1_chr15	3306301	108	93	96	11	35	16	90	103	112	0	0	0	same_svim
h1_chr15	3306302	107	91	95	11	35	16	90	103	112	0	0	0	same_svim
h1_chr15	3306303	106	89	96	11	35	16	90	103	114	0	0	0	same_svim
h1_chr15	3306304	107	89	96	11	35	15	90	103	113	0	0	0	same_svim
h1_chr15	3306305	107	90	97	12	35	15	89	101	113	0	0	0	same_svim
h1_chr15	3306306	107	91	96	12	35	15	89	101	113	0	0	0	same_svim
h1_chr15	3306307	106	92	94	12	35	15	90	101	113	0	0	0	same_svim
h1_chr15	3306308	107	91	93	12	35	15	89	100	114	0	0	0	same_svim
h1_chr15	3306309	106	91	94	12	35	15	90	100	115	0	0	0	same_svim
h1_chr15	3306310	107	92	96	12	34	16	90	104	113	0	0	0	same_svim
h1_chr15	3306311	107	92	97	12	34	16	90	104	111	0	0	0	same_svim
h1_chr15	3306312	107	92	97	12	34	16	90	104	110	0	0	0	same_svim
h1_chr15	3306313	106	92	98	12	33	16	92	106	111	0	0	0	same_svim
h1_chr15	3306314	107	90	97	13	32	16	92	107	111	0	0	0	same_svim
h1_chr15	3306315	106	90	98	12	34	16	93	107	110	0	0	0	same_svim
h1_chr15	3306316	105	90	96	12	35	17	93	106	112	0	0	0	same_svim
h1_chr15	3306317	106	91	97	12	35	16	94	106	112	0	0	0	same_svim
h1_chr15	3306318	105	91	96	10	35	16	94	107	112	0	0	0	same_svim
h1_chr15	3306319	105	90	97	10	35	17	94	107	111	0	0	0	same_svim
h1_chr15	3306320	104	92	96	10	35	17	94	107	113	0	0	0	same_svim
h1_chr15	3306321	102	92	98	10	35	19	92	108	112	0	0	0	same_svim
h1_chr15	3306322	102	92	99	10	36	19	91	107	112	0	0	0	same_svim
h1_chr15	3306323	103	92	99	10	36	19	92	107	111	0	0	0	same_svim
h1_chr15	3306324	104	92	99	10	34	20	91	107	111	0	0	0	same_svim
h1_chr15	3306325	104	94	100	10	34	20	93	105	110	0	0	0	same_svim
h1_chr15	3306326	103	95	100	10	35	19	92	105	108	0	0	0	same_svim
h1_chr15	3306327	103	95	99	10	35	19	92	105	109	0	0	0	same_svim
h1_chr15	3306328	103	96	99	10	35	19	91	104	109	0	0	0	same_svim
h1_chr15	3306329	102	98	96	10	35	19	90	105	109	0	0	0	same_svim
h1_chr15	3306330	103	100	96	10	35	19	90	106	107	0	0	0	same_svim
h1_chr15	3306331	102	100	95	10	36	19	90	106	107	0	0	0	same_svim
h1_chr15	3306332	102	100	96	10	36	19	88	106	105	0	0	0	same_svim
h1_chr15	3306333	104	100	95	10	35	19	88	107	105	0	0	0	same_svim
h1_chr15	3306334	105	101	97	10	35	20	89	106	106	0	0	0	same_svim
h1_chr15	3306335	103	103	98	10	35	20	90	106	106	0	0	0	same_svim
h1_chr15	3306336	102	106	97	8	35	20	87	106	106	0	0	0	same_svim
h1_chr15	3306337	102	107	97	8	35	20	87	106	104	0	0	0	same_svim
h1_chr15	3306338	101	106	97	8	35	20	88	106	102	0	0	0	same_svim
h1_chr15	3306339	100	107	100	7	36	19	90	105	101	0	0	0	same_svim
h1_chr15	3306340	98	106	100	7	36	19	91	105	101	0	0	0	same_svim
h1_chr15	3306341	98	106	99	7	35	19	90	105	98	0	0	0	same_svim
h1_chr15	3306342	98	107	100	7	34	19	90	104	98	0	0	0	same_svim
h1_chr15	3306343	97	106	101	7	34	19	90	104	98	0	0	0	same_svim
h1_chr15	3306344	98	105	102	7	34	19	91	104	97	0	0	0	same_svim
h1_chr15	3306345	99	105	105	7	35	19	91	104	96	0	0	0	same_svim
h1_chr15	3306346	99	104	104	7	34	19	92	104	96	0	0	0	same_svim
h1_chr15	3306347	99	104	106	7	34	19	92	102	95	0	0	0	same_svim
h1_chr15	3306348	99	104	106	7	34	20	92	102	96	0	0	0	same_svim
h1_chr15	3306349	99	104	106	6	34	19	90	103	96	0	0	0	same_svim
h1_chr15	3306350	99	104	106	6	36	20	90	103	95	0	0	0	same_svim
h1_chr15	3306351	98	104	105	6	36	20	92	103	94	0	0	0	same_svim
h1_chr15	3306352	97	102	105	6	36	20	92	103	93	0	0	0	same_svim
h1_chr15	3306353	97	104	105	6	36	20	91	102	93	0	0	0	same_svim
h1_chr15	3306354	97	103	105	6	36	20	91	101	92	0	0	0	same_svim
h1_chr15	3306355	94	102	106	6	36	20	92	101	90	0	0	0	same_svim
h1_chr15	3306356	95	104	107	6	36	20	90	101	90	0	0	0	same_svim
h1_chr15	3306357	96	103	107	6	36	20	90	101	90	0	0	0	same_svim
h1_chr15	3306358	96	103	107	6	37	21	90	101	91	0	0	0	same_svim
h1_chr15	3306359	96	104	108	6	37	21	92	100	90	0	0	0	same_svim
h1_chr15	3306360	95	102	110	6	37	21	92	101	89	0	0	0	same_svim
h1_chr15	3306361	96	102	112	6	37	21	92	101	91	0	0	0	same_svim
h1_chr15	3306362	96	101	113	7	37	21	92	102	91	0	0	0	same_svim
h1_chr15	3306363	96	103	114	8	38	20	91	102	90	0	0	0	same_svim
h1_chr15	3306364	97	102	114	8	38	20	91	102	92	0	0	0	same_svim
h1_chr15	3306365	98	105	112	8	37	21	91	102	93	0	0	0	same_svim
h1_chr15	3306366	98	104	111	8	38	21	92	103	92	0	0	0	same_svim
h1_chr15	3306367	99	105	110	8	38	21	93	105	92	0	0	0	same_svim
h1_chr15	3306368	99	106	111	8	38	21	95	105	93	0	0	0	same_svim
h1_chr15	3306369	97	106	109	8	39	20	95	105	93	0	0	0	same_svim
h1_chr15	3306370	94	106	108	8	39	20	95	105	94	0	0	0	same_svim
h1_chr15	3306371	92	105	107	8	39	20	96	104	95	0	0	0	same_svim
h1_chr15	3306372	92	104	108	7	40	20	96	103	94	0	0	0	same_svim
h1_chr15	3306373	91	102	108	7	40	20	97	103	95	0	0	0	same_svim
h1_chr15	3306374	92	102	108	7	40	20	97	103	95	0	0	0	same_svim
h1_chr15	3306375	94	102	108	7	40	20	97	102	95	0	0	0	same_svim
h1_chr15	3306376	94	103	109	7	41	20	98	103	96	0	0	0	same_svim
h1_chr15	3306377	94	103	108	7	41	20	98	103	96	0	0	0	same_svim
h1_chr15	3306378	94	104	109	7	39	20	95	104	98	0	0	0	same_svim
h1_chr15	3306379	96	104	108	7	38	21	95	105	98	0	0	0	same_svim
h1_chr15	3306380	95	104	107	7	37	20	95	106	99	0	0	0	same_svim
h1_chr15	3306381	96	107	107	8	37	20	94	106	99	0	0	0	same_svim
h1_chr15	3306382	97	106	107	8	36	20	95	106	100	0	0	0	same_svim
h1_chr15	3306383	97	106	107	8	35	20	97	104	102	0	0	0	same_svim
h1_chr15	3306384	96	106	109	8	34	20	97	103	101	0	0	0	same_svim
h1_chr15	3306385	96	106	109	8	34	20	99	103	99	0	0	0	same_svim
h1_chr15	3306386	95	107	109	8	35	20	99	104	100	0	0	0	same_svim
h1_chr15	3306387	94	105	107	8	35	20	99	104	100	0	0	0	same_svim
h1_chr15	3306388	95	104	108	8	36	20	99	104	98	0	0	0	same_svim
h1_chr15	3306389	95	105	107	7	36	20	99	104	98	0	0	0	same_svim
h1_chr15	3306390	95	104	106	7	36	20	99	104	100	0	0	0	same_svim
h1_chr15	3306391	96	103	107	7	35	20	100	102	100	0	0	0	same_svim
h1_chr15	3306392	95	103	108	7	35	20	102	102	100	0	0	0	same_svim
h1_chr15	3306393	96	104	108	7	35	20	102	102	100	0	0	0	same_svim
h1_chr15	3306394	95	105	107	7	35	20	102	102	99	0	0	0	same_svim
h1_chr15	3306395	94	104	106	7	35	20	99	103	97	0	0	0	same_svim
h1_chr15	3306396	94	103	106	7	35	20	99	103	97	0	0	0	same_svim
h1_chr15	3306397	95	102	106	7	35	20	98	103	99	0	0	0	same_svim
h1_chr15	3306398	93	102	106	7	34	20	97	103	99	0	0	0	same_svim
h1_chr15	3306399	92	101	105	7	34	20	97	103	98	0	0	0	same_svim
h1_chr15	3306400	92	101	105	7	34	20	96	103	99	0	0	0	same_svim
h1_chr15	3306401	93	101	104	7	34	20	98	102	100	0	0	0	same_svim
h1_chr15	3306402	92	101	104	7	34	20	96	101	101	0	0	0	same_svim
h1_chr15	3306403	91	100	103	7	34	20	96	102	101	0	0	0	same_svim
h1_chr15	3306404	92	100	101	7	35	18	98	102	102	0	0	0	same_svim
h1_chr15	3306405	92	99	101	7	35	18	97	100	102	0	0	0	same_svim
h1_chr15	3306406	92	99	101	7	35	18	97	101	104	0	0	0	same_svim
h1_chr15	3306407	92	99	101	7	35	17	97	103	105	0	0	0	same_svim
h1_chr15	3306408	92	97	100	7	35	17	96	102	105	0	0	0	same_svim
h1_chr15	3306409	91	96	99	7	35	16	96	102	105	0	0	0	same_svim
h1_chr15	3306410	92	97	101	7	35	16	97	101	107	0	0	0	same_svim
h1_chr15	3306411	92	98	102	7	35	16	97	101	107	0	0	0	same_svim
h1_chr15	3306412	93	98	106	7	35	15	97	101	106	0	0	0	same_svim
h1_chr15	3306413	92	98	106	7	36	15	98	100	105	0	0	0	same_svim
h1_chr15	3306414	93	73	71	0	26	0	98	100	105	0	0	0
h1_chr15	3306415	93	70	71	0	25	0	98	98	105	0	0	0
h1_chr15	3306416	92	65	64	0	23	0	99	97	107	0	0	0
h1_chr15	3306417	90	66	64	0	23	0	100	95	105	0	0	0
h1_chr15	3306418	89	66	62	0	23	0	100	95	103	0	0	0
h1_chr15	3306419	89	67	59	0	23	0	100	95	104	0	0	0
h1_chr15	3306420	89	66	59	0	23	0	99	96	103	0	0	0
h1_chr15	3306421	91	66	60	0	23	0	96	96	103	0	0	0
h1_chr15	3306422	89	66	59	0	23	0	96	96	103	0	0	0
h1_chr15	3306423	88	65	59	0	23	0	97	97	105	0	0	0
h1_chr15	3306424	89	65	58	0	23	0	97	98	106	0	0	0
h1_chr15	3306425	91	66	58	0	23	0	97	98	105	0	0	0
h1_chr15	3306426	91	66	58	0	22	0	96	99	105	0	0	0
h1_chr15	3306427	91	66	58	0	21	0	96	100	104	0	0	0
h1_chr15	3306428	91	66	58	0	21	0	95	102	105	0	0	0
h1_chr15	3306429	92	65	58	0	20	0	94	103	105	0	0	0
h1_chr15	3306430	92	65	59	0	20	0	95	103	105	0	0	0
h1_chr15	3306431	92	64	58	0	20	0	93	103	104	0	0	0
h1_chr15	3306432	91	64	58	0	20	0	92	103	103	0	0	0
h1_chr15	3306433	91	63	59	0	20	0	93	104	104	0	0	0
h1_chr15	3306434	89	63	59	0	20	0	96	103	103	0	0	0
h1_chr15	3306435	87	64	60	1	20	0	96	103	103	0	0	0
h1_chr15	3306436	86	64	60	1	20	0	96	103	102	0	0	0
h1_chr15	3306437	87	93	105	8	34	17	96	105	102	0	0	0	same_svim
h1_chr15	3306438	88	93	103	8	35	17	94	105	104	0	0	0	same_svim
h1_chr15	3306439	86	95	102	8	35	17	95	105	102	0	0	0	same_svim
h1_chr15	3306440	88	95	104	8	34	17	94	106	103	0	0	0	same_svim
h1_chr15	3306441	88	95	104	8	34	17	95	106	104	0	0	0	same_svim
h1_chr15	3306442	90	94	104	8	34	18	95	107	104	0	0	0	same_svim
h1_chr15	3306443	89	93	103	8	34	18	95	107	104	0	0	0	same_svim
h1_chr15	3306444	87	94	107	8	33	18	96	108	103	0	0	0	same_svim
h1_chr15	3306445	87	95	107	9	33	18	96	108	103	0	0	0	same_svim
h1_chr15	3306446	86	97	107	9	33	18	96	109	103	0	0	0	same_svim
h1_chr15	3306447	86	96	108	9	33	18	95	109	103	0	0	0	same_svim
h1_chr15	3306448	85	96	108	9	33	18	94	109	104	0	0	0	same_svim
h1_chr15	3306449	83	97	109	9	33	18	91	107	105	0	0	0	same_svim
h1_chr15	3306450	82	98	110	9	33	18	90	107	105	0	0	0	same_svim
h1_chr15	3306451	83	100	112	9	33	18	88	106	104	0	0	0	same_svim
h1_chr15	3306452	84	101	112	9	33	18	90	108	108	0	0	0	same_svim
h1_chr15	3306453	84	101	113	9	33	18	90	108	106	0	0	0	same_svim
h1_chr15	3306454	83	101	113	9	33	18	90	108	109	0	0	0	same_svim
h1_chr15	3306455	83	102	113	9	33	18	90	108	110	0	0	0	same_svim
h1_chr15	3306456	84	100	113	9	33	18	91	108	110	0	0	0	same_svim
h1_chr15	3306457	84	100	113	9	33	18	90	108	111	0	0	0	same_svim
h1_chr15	3306458	83	100	115	10	33	18	91	107	112	0	0	0	same_svim
h1_chr15	3306459	84	101	115	10	33	18	91	107	111	0	0	0	same_svim
h1_chr15	3306460	85	100	114	10	33	18	92	108	113	0	0	0	same_svim
h1_chr15	3306461	85	102	114	10	33	19	91	108	112	0	0	0	same_svim
h1_chr15	3306462	85	103	116	10	33	19	94	107	113	0	0	0	same_svim
h1_chr15	3306463	85	104	116	10	33	19	94	107	112	0	0	0	same_svim
h1_chr15	3306464	84	104	117	8	33	19	95	107	112	0	0	0	same_svim
h1_chr15	3306465	86	104	117	8	33	19	94	108	114	0	0	0	same_svim
h1_chr15	3306466	86	104	117	8	32	19	95	107	112	0	0	0	same_svim
h1_chr15	3306467	85	103	115	8	33	19	94	107	112	0	0	0	same_svim
h1_chr15	3306468	85	102	116	8	32	19	94	108	111	0	0	0	same_svim
h1_chr15	3306469	85	103	116	9	32	18	94	108	111	0	0	0	same_svim
h1_chr15	3306470	86	102	116	9	32	19	94	107	109	0	0	0	same_svim
h1_chr15	3306471	88	102	115	9	32	19	94	106	108	0	0	0	same_svim
h1_chr15	3306472	88	101	113	10	32	19	94	107	109	0	0	0	same_svim
h1_chr15	3306473	89	101	113	10	31	19	92	109	109	0	0	0	same_svim
h1_chr15	3306474	90	101	113	10	31	18	93	108	110	0	0	0	same_svim
h1_chr15	3306475	89	100	112	10	31	18	92	108	110	0	0	0	same_svim
h1_chr15	3306476	90	99	111	10	31	18	93	108	110	0	0	0	same_svim
h1_chr15	3306477	90	99	112	10	31	18	96	108	109	0	0	0	same_svim
h1_chr15	3306478	89	97	111	10	32	18	98	108	110	0	0	0	same_svim
h1_chr15	3306479	90	97	111	9	31	18	100	108	110	0	0	0	same_svim
h1_chr15	3306480	90	94	111	9	31	18	101	109	108	0	0	0	same_svim
h1_chr15	3306481	89	95	112	9	32	18	100	108	107	0	0	0	same_svim
h1_chr15	3306482	87	95	111	9	32	19	102	109	109	0	0	0	same_svim
h1_chr15	3306483	85	95	112	9	32	19	103	108	109	0	0	0	same_svim
h1_chr15	3306484	84	93	109	10	32	18	101	108	108	0	0	0	same_svim
h1_chr15	3306485	86	93	109	10	32	18	102	107	107	0	0	0	same_svim
h1_chr15	3306486	86	94	111	10	33	18	104	105	106	0	0	0	same_svim
h1_chr15	3306487	87	94	111	10	34	18	105	107	110	0	0	0	same_svim
h1_chr15	3306488	87	94	110	9	34	18	105	106	110	0	0	0	same_svim
h1_chr15	3306489	86	93	111	9	33	18	104	108	110	0	0	0	same_svim
h1_chr15	3306490	86	94	111	9	32	17	104	107	110	0	0	0	same_svim
h1_chr15	3306491	89	94	114	9	32	17	103	107	112	0	0	0	same_svim
h1_chr15	3306492	89	93	112	9	32	17	104	105	111	0	0	0	same_svim
h1_chr15	3306493	89	92	112	10	34	16	106	105	111	0	0	0	same_svim
h1_chr15	3306494	88	91	111	10	34	17	105	106	112	0	0	0	same_svim
h1_chr15	3306495	87	91	110	10	34	15	106	106	114	0	0	0	same_svim
h1_chr15	3306496	86	91	111	10	33	15	104	106	114	0	0	0	same_svim
h1_chr15	3306497	85	92	111	10	33	15	105	106	115	0	0	0	same_svim
h1_chr15	3306498	85	92	110	10	33	14	107	104	116	0	0	0	same_svim
h1_chr15	3306499	85	92	111	10	33	14	107	102	117	0	0	0	same_svim
h1_chr15	3306500	85	92	112	10	32	14	106	103	117	0	0	0	same_svim
h1_chr15	3306501	86	91	112	10	32	13	104	103	118	0	0	0	same_svim
h1_chr15	3306502	86	89	112	10	32	13	106	101	119	0	0	0	same_svim
h1_chr15	3306503	85	90	112	11	32	13	106	100	118	0	0	0	same_svim
h1_chr15	3306504	85	90	112	11	32	13	108	100	118	0	0	0	same_svim
h1_chr15	3306505	84	90	111	11	33	13	109	98	118	0	0	0	same_svim
h1_chr15	3306506	86	81	110	11	33	13	109	101	119	0	0	0	same_svim
h1_chr15	3306507	85	83	109	11	33	13	109	101	118	0	0	0	same_svim
h1_chr15	3306508	85	83	108	11	33	12	110	101	119	0	0	0	same_svim
h1_chr15	3306509	84	81	107	11	33	12	108	101	121	0	0	0	same_svim
h1_chr15	3306510	84	88	109	11	33	12	108	101	122	0	0	0	same_svim
h1_chr15	3306511	85	88	109	11	33	12	108	102	121	0	0	0	same_svim
h1_chr15	3306512	84	88	105	11	33	12	109	102	121	0	0	0	same_svim
h1_chr15	3306513	84	90	104	11	32	12	110	102	121	0	0	0	same_svim
h1_chr15	3306514	83	89	105	11	30	12	111	102	118	0	0	0	same_svim
h1_chr15	3306515	82	90	105	11	30	12	111	102	118	0	0	0	same_svim
h1_chr15	3306516	84	90	105	11	30	12	112	102	118	0	0	0	same_svim
h1_chr15	3306517	83	90	105	11	29	12	111	101	120	0	0	0	same_svim
h1_chr15	3306518	83	90	103	11	29	12	109	103	120	0	0	0	same_svim
h1_chr15	3306519	83	91	103	11	29	13	110	103	120	0	0	0	same_svim
h1_chr15	3306520	83	92	103	11	29	13	111	103	119	0	0	0	same_svim
h1_chr15	3306521	84	91	103	12	29	13	111	103	119	0	0	0	same_svim
h1_chr15	3306522	84	92	102	12	29	12	111	103	122	0	0	0	same_svim
h1_chr15	3306523	86	92	101	12	28	12	109	104	121	0	0	0	same_svim
h1_chr15	3306524	87	91	102	12	27	11	108	105	120	0	0	0	same_svim
h1_chr15	3306525	86	92	103	12	28	11	109	105	121	0	0	0	same_svim
h1_chr15	3306526	86	91	105	12	28	12	108	105	119	0	0	0	same_svim
h1_chr15	3306527	85	91	105	12	28	12	108	103	118	0	0	0	same_svim
h1_chr15	3306528	84	93	105	12	28	12	109	103	118	0	0	0	same_svim
h1_chr15	3306529	82	92	105	12	28	12	109	104	119	0	0	0	same_svim
h1_chr15	3306530	84	93	105	12	28	12	109	104	118	0	0	0	same_svim
h1_chr15	3306531	85	91	105	12	28	12	109	105	119	0	0	0	same_svim
h1_chr15	3306532	84	92	107	12	27	11	109	104	118	0	0	0	same_svim
h1_chr15	3306533	85	95	107	12	27	11	107	104	118	0	0	0	same_svim
h1_chr15	3306534	86	94	106	12	27	11	107	104	121	0	0	0	same_svim
h1_chr15	3306535	87	93	106	12	27	11	105	102	121	0	0	0	same_svim
h1_chr15	3306536	87	90	103	11	27	11	105	101	120	0	0	0	same_svim
h1_chr15	3306537	87	90	103	10	26	11	104	101	119	0	0	0	same_svim
h1_chr15	3306538	87	91	102	10	26	11	103	101	121	0	0	0	same_svim
h1_chr15	3306539	88	89	102	10	25	10	102	102	121	0	0	0	same_svim
h1_chr15	3306540	89	90	104	10	25	10	102	102	120	0	0	0	same_svim
h1_chr15	3306541	89	91	104	11	25	10	102	101	119	0	0	0	same_svim
h1_chr15	3306542	90	91	103	11	26	10	100	101	120	0	0	0	same_svim
h1_chr15	3306543	89	88	102	11	25	10	99	100	122	0	0	0	same_svim
h1_chr15	3306544	90	88	103	11	26	10	100	100	124	0	0	0	same_svim
h1_chr15	3306545	93	87	104	11	27	10	100	100	125	0	0	0	same_svim
h1_chr15	3306546	92	87	105	11	26	10	101	98	125	0	0	0	same_svim
h1_chr15	3306547	91	87	105	11	26	10	101	96	125	0	0	0	same_svim
h1_chr15	3306548	91	88	105	11	28	10	101	96	126	0	0	0	same_svim
h1_chr15	3306549	91	89	104	11	28	10	101	96	126	0	0	0	same_svim
h1_chr15	3306550	91	90	104	11	28	10	101	96	126	0	0	0	same_svim
h1_chr15	3306551	91	89	106	11	28	10	98	96	126	0	0	0	same_svim
h1_chr15	3306552	92	91	106	12	28	10	98	96	125	0	0	0	same_svim
h1_chr15	3306553	92	91	107	12	28	9	98	96	121	0	0	0	same_svim
h1_chr15	3306554	92	91	107	12	28	9	97	96	120	0	0	0	same_svim
h1_chr15	3306555	92	91	106	11	27	10	97	96	120	0	0	0	same_svim
h1_chr15	3306556	91	93	107	11	27	10	96	97	119	0	0	0	same_svim
h1_chr15	3306557	90	94	105	11	28	11	98	97	119	0	0	0	same_svim
h1_chr15	3306558	91	94	104	11	28	11	98	96	119	0	0	0	same_svim
h1_chr15	3306559	91	93	104	11	28	11	99	96	119	0	0	0	same_svim
h1_chr15	3306560	90	93	104	11	29	11	98	97	118	0	0	0	same_svim
h1_chr15	3306561	89	92	104	11	29	11	98	93	117	0	0	0	same_svim
h1_chr15	3306562	88	92	100	11	28	11	98	93	117	0	0	0	same_svim
h1_chr15	3306563	88	92	101	11	28	11	99	93	118	0	0	0	same_svim
h1_chr15	3306564	87	92	103	11	27	11	100	91	120	0	0	0	same_svim
h1_chr15	3306565	87	93	100	11	25	11	101	89	121	0	0	0	same_svim
h1_chr15	3306566	86	93	101	11	25	11	101	88	119	0	0	0	same_svim
h1_chr15	3306567	85	92	102	11	25	12	102	90	120	0	0	0	same_svim
h1_chr15	3306568	86	90	102	11	24	12	102	91	121	0	0	0	same_svim
h1_chr15	3306569	88	88	104	11	24	12	101	90	120	0	2	0	same_svim
h1_chr15	3306570	88	89	104	11	24	13	102	90	118	0	2	0	same_svim
h1_chr15	3306571	86	90	104	12	24	13	102	92	118	0	2	0	same_svim
h1_chr15	3306572	88	90	104	13	25	13	101	91	118	0	2	0	same_svim
h1_chr15	3306573	88	91	105	13	25	13	101	91	116	0	2	0	same_svim
h1_chr15	3306574	89	91	105	13	25	13	103	91	116	0	2	0	same_svim
h1_chr15	3306575	89	91	104	13	25	12	107	92	116	0	2	0	same_svim
h1_chr15	3306576	90	94	106	13	25	12	106	92	117	0	2	0	same_svim
h1_chr15	3306577	91	94	106	13	25	12	106	93	119	0	2	0	same_svim
h1_chr15	3306578	92	94	108	13	25	11	106	94	118	0	2	0	same_svim
h1_chr15	3306579	91	95	107	13	25	11	106	94	121	0	2	0	same_svim
h1_chr15	3306580	92	95	108	14	25	12	105	95	122	0	2	0	same_svim
h1_chr15	3306581	92	95	107	14	25	12	106	94	122	0	2	0	same_svim
h1_chr15	3306582	95	94	107	14	25	13	108	94	121	0	2	0	same_svim
h1_chr15	3306583	96	95	106	14	25	13	107	94	120	0	2	0	same_svim
h1_chr15	3306584	97	95	106	14	25	13	105	93	120	0	2	0	same_svim
h1_chr15	3306585	97	94	105	14	24	13	106	93	118	0	2	0	same_svim
h1_chr15	3306586	97	95	105	13	24	13	106	93	120	0	2	0	same_svim
h1_chr15	3306587	93	95	103	13	24	13	105	93	121	0	2	0	same_svim
h1_chr15	3306588	92	97	104	13	23	13	106	94	119	0	2	0	same_svim
h1_chr15	3306589	92	95	104	13	22	14	107	92	119	0	2	0	same_svim
h1_chr15	3306590	91	93	99	13	22	14	107	92	118	0	2	0	same_svim
h1_chr15	3306591	92	92	99	13	22	14	109	94	117	0	2	0	same_svim
h1_chr15	3306592	92	92	100	13	22	14	109	94	116	0	2	0	same_svim
h1_chr15	3306593	92	92	102	13	22	13	109	94	115	0	2	0	same_svim
h1_chr15	3306594	92	91	101	13	22	13	109	94	122	0	0	0	same_svim
h1_chr15	3306595	93	91	102	13	23	13	108	94	122	0	0	0	same_svim
h1_chr15	3306596	94	89	102	12	23	13	108	93	124	0	0	0	same_svim
h1_chr15	3306597	94	88	102	12	23	13	108	93	124	0	0	0	same_svim
h1_chr15	3306598	94	88	103	12	23	13	110	93	124	0	0	0	same_svim
h1_chr15	3306599	94	88	103	12	23	13	110	93	122	0	0	0	same_svim
h1_chr15	3306600	95	89	102	12	23	13	109	93	124	0	0	0	same_svim
h1_chr15	3306601	94	87	100	12	24	13	109	93	123	0	0	0	same_svim
h1_chr15	3306602	93	87	100	13	24	13	109	93	121	0	0	0	same_svim
h1_chr15	3306603	93	87	100	13	24	14	109	93	120	0	0	0	same_svim
h1_chr15	3306604	93	87	101	13	24	14	109	93	117	0	0	0	same_svim
h1_chr15	3306605	93	87	101	13	24	14	109	94	116	0	0	0	same_svim
h1_chr15	3306606	91	89	101	13	24	14	108	94	115	0	0	0	same_svim
h1_chr15	3306607	92	89	101	13	24	14	108	95	113	0	0	0	same_svim
h1_chr15	3306608	92	89	99	13	24	15	107	96	112	0	0	0	same_svim
h1_chr15	3306609	92	89	98	12	24	15	106	97	114	0	0	0	same_svim
h1_chr15	3306610	89	89	99	12	24	15	105	99	113	0	0	0	same_svim
h1_chr15	3306611	91	88	99	12	24	15	106	98	115	0	0	0	same_svim
h1_chr15	3306612	92	88	99	12	24	14	104	97	116	0	0	0	same_svim
h1_chr15	3306613	92	87	100	12	24	14	102	95	115	0	0	0	same_svim
h1_chr15	3306614	93	87	99	12	24	15	102	95	115	0	0	0	same_svim
h1_chr15	3306615	92	89	101	12	25	15	102	95	114	0	0	0	same_svim
h1_chr15	3306616	92	87	102	12	26	15	101	95	115	0	0	0	same_svim
h1_chr15	3306617	93	87	102	12	26	15	101	93	116	0	0	0	same_svim
h1_chr15	3306618	93	88	101	12	25	15	101	92	117	0	0	0	same_svim
h1_chr15	3306619	93	87	102	12	25	15	101	92	118	0	0	0	same_svim
h1_chr15	3306620	93	88	103	11	25	15	101	92	120	0	0	0	same_svim
h1_chr15	3306621	91	91	104	12	25	14	104	91	121	0	0	0	same_svim
h1_chr15	3306622	91	92	106	12	25	14	104	91	121	0	0	0	same_svim
h1_chr15	3306623	89	94	109	11	25	14	106	92	121	0	0	0	same_svim
h1_chr15	3306624	87	94	110	11	25	14	105	92	121	0	0	0	same_svim
h1_chr15	3306625	87	93	111	11	26	14	104	91	123	0	0	0	same_svim
h1_chr15	3306626	87	93	111	11	26	14	105	91	126	0	0	0	same_svim
h1_chr15	3306627	87	93	110	11	26	14	102	92	127	0	0	0	same_svim
h1_chr15	3306628	87	92	110	11	26	14	102	92	126	0	0	0	same_svim
h1_chr15	3306629	87	92	109	11	25	14	102	91	126	0	0	0	same_svim
h1_chr15	3306630	87	92	109	11	25	14	105	91	128	0	0	0	same_svim
h1_chr15	3306631	89	91	108	11	25	14	107	90	129	0	0	0	same_svim
h1_chr15	3306632	89	93	108	11	24	14	106	91	128	0	0	0	same_svim
h1_chr15	3306633	89	94	110	11	23	13	108	91	127	0	0	0	same_svim
h1_chr15	3306634	90	95	110	11	23	13	110	92	128	0	0	0	same_svim
h1_chr15	3306635	89	96	111	10	23	13	108	93	128	0	0	0	same_svim
h1_chr15	3306636	88	94	109	10	23	13	106	93	129	0	0	0	same_svim
h1_chr15	3306637	87	93	110	10	22	14	105	93	126	0	0	0	same_svim
h1_chr15	3306638	87	93	111	10	21	14	104	93	127	0	0	0	same_svim
h1_chr15	3306639	87	93	110	10	21	14	103	93	128	0	0	0	same_svim
h1_chr15	3306640	87	92	111	10	21	14	103	93	128	0	0	0	same_svim
h1_chr15	3306641	83	93	108	10	21	14	103	93	127	0	0	0	same_svim
h1_chr15	3306642	84	94	108	10	21	14	102	93	127	0	0	0	same_svim
h1_chr15	3306643	85	94	107	10	21	14	100	93	127	0	0	0	same_svim
h1_chr15	3306644	86	95	106	9	19	15	101	92	125	0	0	0	same_svim
h1_chr15	3306645	88	96	107	9	20	14	101	92	123	0	0	0	same_svim
h1_chr15	3306646	89	97	108	9	20	14	102	93	125	0	0	0	same_svim
h1_chr15	3306647	89	96	108	9	20	14	102	93	125	0	0	0	same_svim
h1_chr15	3306648	89	96	108	9	20	14	100	94	124	0	0	0	same_svim
h1_chr15	3306649	89	96	108	9	20	14	100	94	123	0	0	0	same_svim
h1_chr15	3306650	90	96	107	9	20	14	100	95	124	0	0	0	same_svim
h1_chr15	3306651	90	96	108	9	21	14	100	95	123	0	0	0	same_svim
h1_chr15	3306652	90	95	109	9	21	14	99	95	122	0	0	0	same_svim
h1_chr15	3306653	90	95	110	9	21	14	100	96	122	0	0	0	same_svim
h1_chr15	3306654	90	95	110	8	21	14	99	95	122	0	0	0	same_svim
h1_chr15	3306655	90	95	111	8	21	14	98	95	123	0	0	0	same_svim
h1_chr15	3306656	87	93	112	8	20	14	99	95	122	0	0	0	same_svim
h1_chr15	3306657	89	91	111	8	20	14	102	94	123	0	0	0	same_svim
h1_chr15	3306658	88	90	110	8	20	14	103	92	121	0	0	0	same_svim
h1_chr15	3306659	91	91	109	8	20	14	104	92	120	0	0	0	same_svim
h1_chr15	3306660	92	90	107	9	21	14	103	93	120	0	0	0	same_svim
h1_chr15	3306661	90	90	106	9	21	14	105	93	120	0	0	0	same_svim
h1_chr15	3306662	91	90	106	9	21	14	104	93	120	0	0	0	same_svim
h1_chr15	3306663	91	89	107	9	21	14	102	93	120	0	0	0	same_svim
h1_chr15	3306664	92	90	107	9	21	14	102	93	120	0	0	0	same_svim
h1_chr15	3306665	92	89	106	9	21	14	103	93	119	0	0	0	same_svim
h1_chr15	3306666	91	90	107	9	22	14	101	93	120	0	0	0	same_svim
h1_chr15	3306667	92	89	107	9	22	14	102	93	118	0	0	0	same_svim
h1_chr15	3306668	92	87	107	9	22	15	102	93	118	0	0	0	same_svim
h1_chr15	3306669	94	86	106	10	22	15	102	93	118	0	0	0	same_svim
h1_chr15	3306670	95	86	106	10	22	14	102	94	118	0	0	0	same_svim
h1_chr15	3306671	95	86	107	10	22	14	102	94	119	0	0	0	same_svim
h1_chr15	3306672	95	85	107	9	22	14	103	94	117	0	0	0	same_svim
h1_chr15	3306673	93	85	108	9	22	14	104	94	118	0	0	0	same_svim
h1_chr15	3306674	92	85	107	9	23	14	105	94	117	0	0	0	same_svim
h1_chr15	3306675	92	84	107	9	22	14	104	93	116	0	0	0	same_svim
h1_chr15	3306676	92	85	105	9	21	14	104	93	118	0	0	0	same_svim
h1_chr15	3306677	93	85	105	9	21	13	104	93	118	0	0	0	same_svim
h1_chr15	3306678	93	83	104	9	20	13	103	92	117	0	0	0	same_svim
h1_chr15	3306679	93	82	104	9	20	14	102	90	117	0	0	0	same_svim
h1_chr15	3306680	91	81	106	9	20	14	102	90	120	0	0	0	same_svim
h1_chr15	3306681	91	81	106	9	21	14	102	90	119	0	0	0	same_svim
h1_chr15	3306682	93	83	106	9	22	14	101	90	119	0	0	0	same_svim
h1_chr15	3306683	92	80	104	9	22	14	101	91	118	0	0	0	same_svim
h1_chr15	3306684	91	81	104	9	22	14	102	90	119	0	0	0	same_svim
h1_chr15	3306685	91	83	104	9	22	14	102	91	119	0	0	0	same_svim
h1_chr15	3306686	94	83	104	9	22	14	103	91	117	0	0	0	same_svim
h1_chr15	3306687	96	83	104	10	22	14	104	91	117	0	0	0	same_svim
h1_chr15	3306688	94	83	105	11	22	14	104	90	116	0	0	0	same_svim
h1_chr15	3306689	94	83	106	11	22	14	107	90	117	0	0	0	same_svim
h1_chr15	3306690	94	81	104	11	22	14	108	89	115	0	0	0	same_svim
h1_chr15	3306691	93	81	103	11	22	14	107	88	116	0	0	0	same_svim
h1_chr15	3306692	92	81	105	10	22	14	108	88	114	0	0	0	same_svim
h1_chr15	3306693	92	81	105	11	22	15	109	86	113	0	0	0	same_svim
h1_chr15	3306694	91	80	106	11	22	15	108	86	113	0	0	0	same_svim
h1_chr15	3306695	88	80	105	11	21	15	108	86	114	0	0	0	same_svim
h1_chr15	3306696	89	80	104	11	20	15	108	86	113	0	0	0	same_svim
h1_chr15	3306697	89	80	104	11	20	15	108	86	111	0	0	0	same_svim
h1_chr15	3306698	90	79	105	11	20	15	108	86	113	0	0	0	same_svim
h1_chr15	3306699	92	79	106	11	19	15	109	86	113	0	0	0	same_svim
h1_chr15	3306700	93	77	105	11	20	15	108	84	112	0	0	0	same_svim
h1_chr15	3306701	93	78	104	11	20	15	108	84	111	0	0	0	same_svim
h1_chr15	3306702	92	76	104	11	21	15	108	84	111	0	0	0	same_svim
h1_chr15	3306703	92	78	103	10	22	15	108	84	111	0	0	0	same_svim
h1_chr15	3306704	92	77	104	10	24	15	109	84	113	0	0	0	same_svim
h1_chr15	3306705	93	77	105	10	24	15	110	84	114	0	0	0	same_svim
h1_chr15	3306706	93	75	105	10	24	14	111	84	114	0	0	0	same_svim
h1_chr15	3306707	93	73	106	11	24	15	109	84	113	0	0	0	same_svim
h1_chr15	3306708	93	73	106	11	23	14	109	83	112	0	0	0	same_svim
h1_chr15	3306709	92	73	106	11	23	14	110	83	111	0	0	0	same_svim
h1_chr15	3306710	92	73	105	11	23	14	110	83	111	0	0	0	same_svim
h1_chr15	3306711	92	72	104	11	23	14	109	83	111	0	0	0	same_svim
h1_chr15	3306712	93	72	104	11	23	14	111	83	111	0	0	0	same_svim
h1_chr15	3306713	92	73	104	12	23	14	110	86	110	0	0	0	same_svim
h1_chr15	3306714	92	77	102	12	23	14	109	87	109	0	0	0	same_svim
h1_chr15	3306715	92	77	101	12	28	16	123	87	108	0	0	0	same_svim
h1_chr15	3306716	92	77	101	12	28	16	121	86	107	0	0	0	same_svim
h1_chr15	3306717	92	77	99	12	28	16	119	86	107	0	0	0	same_svim
h1_chr15	3306718	91	77	100	12	28	15	119	86	107	0	0	0	same_svim
h1_chr15	3306719	89	77	100	12	29	15	119	84	107	0	0	0	same_svim
h1_chr15	3306720	89	77	99	12	29	15	119	84	109	0	0	0	same_svim
h1_chr15	3306721	89	76	99	12	29	14	119	84	109	0	0	0	same_svim
h1_chr15	3306722	87	77	99	11	29	14	120	84	109	0	0	0	same_svim
h1_chr15	3306723	87	77	99	10	28	14	119	83	109	0	0	0	same_svim
h1_chr15	3306724	85	77	100	10	28	14	118	81	108	0	0	0	same_svim
h1_chr15	3306725	87	78	101	10	28	14	115	81	109	0	0	0	same_svim
h1_chr15	3306726	86	76	101	10	28	14	116	82	109	0	0	0	same_svim
h1_chr15	3306727	86	76	100	10	28	15	118	83	106	0	0	0	same_svim
h1_chr15	3306728	86	78	98	11	28	16	117	84	106	0	0	0	same_svim
h1_chr15	3306729	87	78	99	11	29	18	117	85	103	0	0	0	same_svim
h1_chr15	3306730	88	78	101	11	30	18	117	85	104	0	0	0	same_svim
h1_chr15	3306731	88	79	102	10	31	17	117	84	106	0	0	0	same_svim
h1_chr15	3306732	85	79	102	10	31	17	116	84	108	0	0	0	same_svim
h1_chr15	3306733	85	80	102	10	31	16	117	83	109	0	0	0	same_svim
h1_chr15	3306734	85	80	102	10	27	14	103	83	106	0	0	0	same_svim
h1_chr15	3306735	84	78	102	10	27	14	103	83	105	0	0	0	same_svim
h1_chr15	3306736	84	78	104	10	27	14	102	84	104	0	0	0	same_svim
h1_chr15	3306737	84	79	103	10	27	14	102	85	106	0	0	0	same_svim
h1_chr15	3306738	84	77	102	10	27	14	103	83	106	0	0	0	same_svim
h1_chr15	3306739	85	77	102	10	27	14	101	83	105	0	0	0	same_svim
h1_chr15	3306740	85	78	102	10	27	13	100	82	105	0	0	0	same_svim
h1_chr15	3306741	85	78	103	10	27	12	100	82	105	0	0	0	same_svim
h1_chr15	3306742	85	80	102	10	27	13	100	81	105	0	0	0	same_svim
h1_chr15	3306743	86	80	101	10	27	13	101	82	106	0	0	0	same_svim
h1_chr15	3306744	87	80	101	10	27	13	102	82	106	0	0	0	same_svim
h1_chr15	3306745	86	80	100	10	27	14	102	81	106	0	0	0	same_svim
h1_chr15	3306746	85	80	101	10	26	14	102	81	104	0	0	0	same_svim
h1_chr15	3306747	86	81	102	10	26	14	101	81	105	0	0	0	same_svim
h1_chr15	3306748	84	83	103	10	26	14	98	80	104	0	0	0	same_svim
h1_chr15	3306749	85	83	103	10	28	14	98	81	104	0	0	0	same_svim
h1_chr15	3306750	85	81	103	10	28	14	100	81	103	0	0	0	same_svim
h1_chr15	3306751	85	81	105	10	28	14	101	81	102	0	0	0	same_svim
h1_chr15	3306752	85	79	105	10	27	15	101	82	102	0	0	0	same_svim
h1_chr15	3306753	86	79	105	9	27	15	102	81	103	0	0	0	same_svim
h1_chr15	3306754	86	79	105	9	27	14	102	81	103	0	0	0	same_svim
h1_chr15	3306755	87	78	105	10	27	14	102	83	103	0	0	0	same_svim
h1_chr15	3306756	88	76	106	10	27	14	102	83	103	0	0	0	same_svim
h1_chr15	3306757	88	76	108	10	27	14	102	80	103	0	0	0	same_svim
h1_chr15	3306758	90	76	108	10	27	13	102	80	102	0	0	0	same_svim
h1_chr15	3306759	89	75	109	10	28	13	102	80	100	0	0	0	same_svim
h1_chr15	3306760	89	75	107	10	28	13	102	80	99	0	0	0	same_svim
h1_chr15	3306761	87	74	106	10	28	13	101	81	97	0	0	0	same_svim
h1_chr15	3306762	86	71	103	10	28	13	100	80	91	0	0	0	same_svim
h1_chr15	3306763	86	71	102	10	28	13	102	80	91	0	0	0	same_svim
h1_chr15	3306764	85	73	102	10	28	13	102	80	94	0	0	0	same_svim
h1_chr15	3306765	85	72	101	10	28	13	104	81	95	0	0	0	same_svim
h1_chr15	3306766	86	73	100	10	27	13	106	81	95	0	0	0	same_svim
h1_chr15	3306767	85	73	101	10	28	13	105	81	96	0	0	0	same_svim
h1_chr15	3306768	85	73	102	10	29	13	106	80	95	0	0	0	same_svim
h1_chr15	3306769	85	73	101	10	29	13	107	78	96	0	0	0	same_svim
h1_chr15	3306770	82	71	100	10	29	13	105	77	93	0	0	0	same_svim
h1_chr15	3306771	82	68	99	10	29	13	102	76	93	0	0	0	same_svim
h1_chr15	3306772	82	67	96	9	29	13	102	76	92	0	0	0	same_svim
h1_chr15	3306773	82	65	93	9	29	13	100	75	92	0	0	0	same_svim
h1_chr15	3306774	82	66	93	9	29	13	100	74	92	0	0	0	same_svim
h1_chr15	3306775	82	66	93	9	29	13	101	72	92	0	0	0	same_svim
h1_chr15	3306776	81	66	93	9	28	14	100	72	91	0	0	0	same_svim
h1_chr15	3306777	81	66	95	9	28	14	103	72	90	0	0	0	same_svim
h1_chr15	3306778	70	66	96	9	28	14	101	72	90	0	0	0	same_svim
h1_chr15	3306779	70	66	97	9	30	14	100	71	91	0	0	0	same_svim
h1_chr15	3306780	69	65	91	9	31	13	92	70	87	0	0	0	same_svim
h1_chr15	3306781	69	67	91	9	31	13	91	70	88	0	0	0	same_svim
h1_chr15	3306782	70	68	92	9	31	13	91	70	88	0	0	0	same_svim
h1_chr15	3306783	78	69	92	9	31	13	91	70	90	0	0	0	same_svim
h1_chr15	3306784	79	70	93	9	31	13	91	70	89	0	0	0	same_svim
h1_chr15	3306785	80	71	94	10	31	13	92	69	90	0	0	0	same_svim
h1_chr15	3306786	83	72	94	10	31	13	93	69	91	0	0	0	same_svim
h1_chr15	3306787	88	75	95	10	31	13	109	77	94	0	0	0	same_svim
h1_chr15	3306788	89	75	95	10	33	13	109	77	93	0	0	0	same_svim
h1_chr15	3306789	91	76	94	10	33	13	108	76	94	0	0	0	same_svim
h1_chr15	3306790	92	75	94	10	33	13	108	76	93	0	0	0	same_svim
h1_chr15	3306791	92	73	93	10	33	13	109	77	93	0	0	0	same_svim
h1_chr15	3306792	91	72	93	10	33	13	108	77	93	0	0	0	same_svim
h1_chr15	3306793	88	69	90	10	34	12	103	77	90	0	0	0	same_svim
h1_chr15	3306794	89	68	88	10	34	12	103	77	91	0	0	0	same_svim
h1_chr15	3306795	90	67	87	11	33	12	104	77	89	0	0	0	same_svim
h1_chr15	3306796	91	67	87	11	33	13	104	80	88	0	0	0	same_svim
h1_chr15	3306797	96	70	90	11	35	13	105	80	94	0	0	0	same_svim
h1_chr15	3306798	97	71	92	11	35	13	108	80	95	0	0	0	same_svim
h1_chr15	3306799	98	72	92	11	35	13	109	80	93	0	0	0	same_svim
h1_chr15	3306800	98	72	92	11	35	13	110	80	94	0	0	0	same_svim
h1_chr15	3306801	99	73	91	11	35	13	111	80	94	0	0	0	same_svim
h1_chr15	3306802	101	72	91	11	34	13	110	80	94	0	0	0	same_svim
h1_chr15	3306803	101	73	91	11	34	13	109	81	94	0	0	0	same_svim
h1_chr15	3306804	100	72	90	11	34	14	107	83	94	0	0	0	same_svim
h1_chr15	3306805	99	74	89	12	34	14	105	83	94	0	0	0	same_svim
h1_chr15	3306806	100	76	89	13	34	14	104	83	94	0	0	0	same_svim
h1_chr15	3306807	99	75	89	13	34	14	105	85	94	0	0	0	same_svim
h1_chr15	3306808	99	74	89	13	34	14	103	84	93	0	0	0	same_svim
h1_chr15	3306809	99	75	91	13	34	14	105	85	93	0	0	0	same_svim
h1_chr15	3306810	99	77	91	12	34	14	105	84	93	0	0	0	same_svim
h1_chr15	3306811	99	77	94	13	33	14	105	84	94	0	0	0	same_svim
h1_chr15	3306812	99	76	94	13	33	14	104	85	94	0	0	0	same_svim
h1_chr15	3306813	98	77	95	13	34	14	105	85	94	0	0	0	same_svim
h1_chr15	3306814	99	78	95	13	34	14	106	84	95	0	0	0	same_svim
h1_chr15	3306815	99	77	95	13	34	14	106	82	94	0	0	0	same_svim
h1_chr15	3306816	98	77	94	13	33	14	105	80	95	0	0	0	same_svim
h1_chr15	3306817	98	77	96	14	33	13	105	80	96	0	0	0	same_svim
h1_chr15	3306818	98	77	97	14	33	13	104	82	97	0	0	0	same_svim
h1_chr15	3306819	99	76	95	13	33	13	104	82	98	0	0	0	same_svim
h1_chr15	3306820	100	78	94	14	33	14	104	83	96	0	0	0	same_svim
h1_chr15	3306821	99	79	95	14	33	15	104	82	95	0	0	0	same_svim
h1_chr15	3306822	98	81	94	14	33	15	105	82	94	0	0	0	same_svim
h1_chr15	3306823	101	81	94	14	33	15	105	82	95	0	0	0	same_svim
h1_chr15	3306824	101	81	93	15	32	15	107	82	95	0	0	0	same_svim
h1_chr15	3306825	102	80	96	15	32	16	110	81	94	0	0	0	same_svim
h1_chr15	3306826	102	80	97	15	33	16	110	81	94	0	0	0	same_svim
h1_chr15	3306827	105	81	97	15	33	16	111	81	94	0	0	0	same_svim
h1_chr15	3306828	105	81	96	15	34	15	111	80	94	0	0	0	same_svim
h1_chr15	3306829	104	83	94	15	33	15	111	80	91	0	0	0	same_svim
h1_chr15	3306830	104	83	94	16	33	15	112	80	93	0	0	0	same_svim
h1_chr15	3306831	104	81	92	16	32	15	110	80	93	0	0	0	same_svim
h1_chr15	3306832	104	82	92	16	31	15	111	80	94	0	0	0	same_svim
h1_chr15	3306833	104	83	91	16	32	15	109	80	93	0	0	0	same_svim
h1_chr15	3306834	106	82	93	16	32	15	110	80	93	0	0	0	same_svim
h1_chr15	3306835	107	84	93	16	32	15	111	81	94	0	0	0	same_svim
h1_chr15	3306836	106	84	93	16	32	15	108	80	94	0	0	0	same_svim
h1_chr15	3306837	105	84	93	15	32	15	109	79	95	0	0	0	same_svim
h1_chr15	3306838	106	86	94	14	32	15	110	79	94	0	0	0	same_svim
h1_chr15	3306839	106	86	96	14	32	15	109	79	95	0	0	0	same_svim
h1_chr15	3306840	105	85	97	14	32	15	109	79	94	0	0	0	same_svim
h1_chr15	3306841	106	85	95	14	32	15	110	79	94	0	0	0	same_svim
h1_chr15	3306842	108	86	95	14	32	14	110	79	93	0	0	0	same_svim
h1_chr15	3306843	109	86	94	13	32	14	109	80	92	0	0	0	same_svim
h1_chr15	3306844	109	86	95	13	31	15	109	80	90	0	0	0	same_svim
h1_chr15	3306845	108	86	95	13	31	15	109	81	90	0	0	0	same_svim
h1_chr15	3306846	106	87	98	13	31	15	112	81	90	0	0	0	same_svim
h1_chr15	3306847	105	86	98	13	31	16	112	81	87	0	0	0	same_svim
h1_chr15	3306848	105	85	98	13	32	16	111	78	88	0	0	0	same_svim
h1_chr15	3306849	106	87	97	13	32	16	111	78	88	0	0	0	same_svim
h1_chr15	3306850	106	86	96	13	31	16	112	78	88	0	0	0	same_svim
h1_chr15	3306851	106	86	101	13	30	16	110	78	88	0	0	0	same_svim
h1_chr15	3306852	104	86	102	13	29	16	110	78	89	0	0	0	same_svim
h1_chr15	3306853	105	86	101	13	28	16	109	78	87	0	0	0	same_svim
h1_chr15	3306854	106	86	100	13	26	16	110	78	87	0	0	0	same_svim
h1_chr15	3306855	106	87	99	13	26	16	111	77	86	0	0	0	same_svim
h1_chr15	3306856	106	88	99	13	26	15	109	77	86	0	0	0	same_svim
h1_chr15	3306857	106	88	99	12	26	16	111	77	86	0	0	0	same_svim
h1_chr15	3306858	106	88	98	12	26	16	111	75	87	0	0	0	same_svim
h1_chr15	3306859	105	88	98	12	26	16	110	75	86	0	0	0	same_svim
h1_chr15	3306860	105	87	99	13	26	16	109	75	86	0	0	0	same_svim
h1_chr15	3306861	105	87	99	13	25	16	109	76	86	0	0	0	same_svim
h1_chr15	3306862	105	87	98	13	25	16	110	76	88	0	0	0	same_svim
h1_chr15	3306863	105	86	99	12	25	16	110	76	87	0	0	0	same_svim
h1_chr15	3306864	105	86	99	12	25	17	110	76	87	0	0	0	same_svim
h1_chr15	3306865	107	86	99	12	25	17	110	78	87	0	0	0	same_svim
h1_chr15	3306866	109	87	100	12	24	17	110	78	86	0	0	0	same_svim
h1_chr15	3306867	108	88	99	12	26	17	110	78	85	0	0	0	same_svim
h1_chr15	3306868	108	88	97	12	26	17	111	80	85	0	0	0	same_svim
h1_chr15	3306869	109	88	98	12	25	17	110	80	83	0	0	0	same_svim
h1_chr15	3306870	110	88	99	12	26	17	110	80	82	0	0	0	same_svim
h1_chr15	3306871	111	87	100	12	26	17	111	79	82	0	0	0	same_svim
h1_chr15	3306872	111	86	99	12	26	17	112	80	82	0	0	0	same_svim
h1_chr15	3306873	110	86	100	12	26	17	111	80	84	0	0	0	same_svim
h1_chr15	3306874	109	85	99	12	26	17	109	81	83	0	0	0	same_svim
h1_chr15	3306875	109	86	98	12	26	17	109	79	84	0	0	0	same_svim
h1_chr15	3306876	109	86	99	12	27	16	110	79	86	0	0	0	same_svim
h1_chr15	3306877	108	84	99	12	27	15	111	79	87	0	0	0	same_svim
h1_chr15	3306878	109	84	99	11	27	13	110	78	88	0	0	0	same_svim
h1_chr15	3306879	110	85	95	11	26	13	109	79	87	0	0	0	same_svim
h1_chr15	3306880	111	86	94	11	25	13	108	80	86	0	0	0	same_svim
h1_chr15	3306881	111	86	95	11	24	13	106	81	84	0	0	0	same_svim
h1_chr15	3306882	112	86	94	11	24	13	104	80	83	0	0	0	same_svim
h1_chr15	3306883	113	86	95	11	24	13	105	79	83	0	0	0	same_svim
h1_chr15	3306884	113	86	95	11	23	13	105	79	83	0	0	0	same_svim
h1_chr15	3306885	113	86	94	11	23	13	103	78	83	0	0	0	same_svim
h1_chr15	3306886	113	86	97	11	23	13	104	78	80	0	0	0	same_svim
h1_chr15	3306887	113	87	97	11	24	13	106	79	80	0	0	0	same_svim
h1_chr15	3306888	112	89	98	11	24	13	106	79	81	0	0	0	same_svim
h1_chr15	3306889	112	89	101	12	24	14	108	79	80	0	0	0	same_svim
h1_chr15	3306890	113	91	101	12	24	14	108	79	79	0	0	0	same_svim
h1_chr15	3306891	112	90	103	12	25	13	106	79	80	0	0	0	same_svim
h1_chr15	3306892	112	90	103	12	25	13	106	79	79	0	0	0	same_svim
h1_chr15	3306893	113	90	103	12	25	13	107	78	80	0	0	0	same_svim
h1_chr15	3306894	111	90	104	12	26	12	108	75	82	0	0	0	same_svim
h1_chr15	3306895	112	90	104	13	26	12	110	76	82	0	0	0	same_svim
h1_chr15	3306896	111	89	103	14	26	12	110	75	83	0	0	0	same_svim
h1_chr15	3306897	112	87	102	14	26	12	110	75	83	0	0	0	same_svim
h1_chr15	3306898	112	86	104	14	26	12	110	75	83	0	0	0	same_svim
h1_chr15	3306899	112	86	105	14	26	12	110	75	82	0	0	0	same_svim
h1_chr15	3306900	112	86	106	14	25	12	109	75	82	0	0	0	same_svim
h1_chr15	3306901	114	87	106	14	25	11	109	74	84	0	0	0	same_svim
h1_chr15	3306902	113	87	106	14	25	11	109	74	83	0	0	0	same_svim
h1_chr15	3306903	114	88	105	14	25	11	109	75	83	0	0	0	same_svim
h1_chr15	3306904	115	89	106	14	25	11	109	75	83	0	0	0	same_svim
h1_chr15	3306905	113	90	105	14	25	11	109	75	83	0	0	0	same_svim
h1_chr15	3306906	112	90	103	14	25	11	109	75	83	0	0	0	same_svim
h1_chr15	3306907	113	91	103	14	26	11	110	75	84	0	0	0	same_svim
h1_chr15	3306908	113	91	102	14	26	11	110	74	84	0	0	0	same_svim
h1_chr15	3306909	114	91	102	14	26	11	110	75	85	0	0	0	same_svim
h1_chr15	3306910	115	91	103	15	25	11	108	75	84	0	0	0	same_svim
h1_chr15	3306911	116	90	104	15	25	11	108	75	83	0	0	0	same_svim
h1_chr15	3306912	115	90	103	15	25	11	106	75	83	0	0	0	same_svim
h1_chr15	3306913	115	89	103	15	25	12	105	75	84	0	0	0	same_svim
h1_chr15	3306914	115	89	103	15	25	12	105	75	84	0	0	0	same_svim
h1_chr15	3306915	115	89	105	15	25	12	104	75	85	0	0	0	same_svim
h1_chr15	3306916	116	89	105	15	25	12	102	76	84	0	0	0	same_svim
h1_chr15	3306917	116	88	104	15	24	12	100	76	84	0	0	0	same_svim
h1_chr15	3306918	115	88	105	15	22	12	99	75	83	0	0	0	same_svim
h1_chr15	3306919	114	88	106	15	22	12	97	74	84	0	0	0	same_svim
h1_chr15	3306920	114	85	106	15	22	12	96	74	84	0	0	0	same_svim
h1_chr15	3306921	113	84	105	16	21	12	93	76	84	0	0	0	same_svim
h1_chr15	3306922	113	84	105	16	21	13	94	76	84	0	0	0	same_svim
h1_chr15	3306923	113	85	105	16	21	13	94	76	85	0	0	0	same_svim
h1_chr15	3306924	113	84	104	16	21	13	94	76	84	0	0	0	same_svim
h1_chr15	3306925	114	84	104	16	21	13	91	77	84	0	0	0	same_svim
h1_chr15	3306926	112	86	104	16	21	13	91	78	82	0	0	0	same_svim
h1_chr15	3306927	112	88	103	16	21	12	90	78	83	0	0	0	same_svim
h1_chr15	3306928	113	88	105	16	21	12	91	77	84	0	0	0	same_svim
h1_chr15	3306929	114	87	104	16	21	12	91	77	84	0	0	0	same_svim
h1_chr15	3306930	114	88	104	16	19	12	93	77	84	0	0	0	same_svim
h1_chr15	3306931	115	88	104	16	19	12	94	77	83	0	0	0	same_svim
h1_chr15	3306932	115	87	103	16	19	12	90	78	85	0	0	0	same_svim
h1_chr15	3306933	113	86	103	16	19	12	88	77	83	0	0	0	same_svim
h1_chr15	3306934	113	86	103	16	19	12	88	77	83	0	0	0	same_svim
h1_chr15	3306935	114	86	109	17	21	12	88	80	84	0	0	0	same_svim
h1_chr15	3306936	111	85	109	16	20	12	88	80	84	0	0	0	same_svim
h1_chr15	3306937	110	84	108	16	20	12	89	81	85	0	0	0	same_svim
h1_chr15	3306938	110	84	109	16	21	12	91	81	85	0	0	0	same_svim
h1_chr15	3306939	109	85	108	16	21	12	92	84	86	0	0	0	same_svim
h1_chr15	3306940	110	84	107	16	20	13	91	84	85	0	0	0	same_svim
h1_chr15	3306941	110	83	109	16	20	13	93	84	84	0	0	0	same_svim
h1_chr15	3306942	110	83	110	16	20	13	94	83	83	0	0	0	same_svim
h1_chr15	3306943	108	83	110	16	19	13	93	86	82	0	0	0	same_svim
h1_chr15	3306944	108	83	109	16	18	13	93	85	81	0	0	0	same_svim
h1_chr15	3306945	107	84	109	15	18	13	93	85	81	0	0	0	same_svim
h1_chr15	3306946	108	86	109	15	18	12	92	85	80	0	0	0	same_svim
h1_chr15	3306947	108	86	107	15	19	12	89	85	81	0	0	0	same_svim
h1_chr15	3306948	107	85	107	15	18	12	90	85	82	0	0	0	same_svim
h1_chr15	3306949	107	85	108	15	18	12	90	85	83	0	0	0	same_svim
h1_chr15	3306950	106	85	108	15	18	12	89	85	83	0	0	0	same_svim
h1_chr15	3306951	104	86	109	15	18	12	89	86	83	0	0	0	same_svim
h1_chr15	3306952	105	86	110	15	18	12	90	86	83	0	0	0	same_svim
h1_chr15	3306953	105	87	112	15	18	12	90	87	83	0	0	0	same_svim
h1_chr15	3306954	104	86	112	15	18	11	90	88	85	0	0	0	same_svim
h1_chr15	3306955	104	84	112	14	19	11	91	89	84	0	0	0	same_svim
h1_chr15	3306956	105	84	112	13	19	11	90	89	84	0	0	0	same_svim
h1_chr15	3306957	105	85	112	13	19	11	91	89	85	0	0	0	same_svim
h1_chr15	3306958	105	86	110	13	19	11	91	88	84	0	0	0	same_svim
h1_chr15	3306959	105	86	109	13	19	11	92	88	83	0	0	0	same_svim
h1_chr15	3306960	107	87	108	13	19	11	92	85	82	0	0	0	same_svim
h1_chr15	3306961	107	88	109	12	19	11	95	85	83	0	0	0	same_svim
h1_chr15	3306962	107	86	107	12	19	11	94	85	85	0	0	0	same_svim
h1_chr15	3306963	106	85	107	12	18	11	92	85	85	0	0	0	same_svim
h1_chr15	3306964	106	87	107	12	18	11	93	85	90	0	0	0	same_svim
h1_chr15	3306965	106	88	107	13	18	11	96	85	91	0	0	0	same_svim
h1_chr15	3306966	108	87	105	13	18	11	97	85	89	0	0	0	same_svim
h1_chr15	3306967	107	89	104	12	19	12	97	85	90	0	0	0	same_svim
h1_chr15	3306968	108	89	104	12	19	12	97	85	89	0	0	0	same_svim
h1_chr15	3306969	108	88	104	12	19	12	97	84	90	0	0	0	same_svim
h1_chr15	3306970	110	87	104	11	19	11	97	84	90	0	0	0	same_svim
h1_chr15	3306971	110	87	105	11	19	11	98	84	91	0	0	0	same_svim
h1_chr15	3306972	107	88	105	11	19	12	98	85	91	0	0	0	same_svim
h1_chr15	3306973	109	88	108	11	20	12	96	84	92	0	0	0	same_svim
h1_chr15	3306974	110	88	109	10	20	12	94	84	91	0	0	0	same_svim
h1_chr15	3306975	111	89	109	10	20	11	94	84	91	0	0	0	same_svim
h1_chr15	3306976	108	89	109	10	20	11	93	84	90	0	0	0	same_svim
h1_chr15	3306977	108	89	109	10	19	11	95	85	91	0	0	0	same_svim
h1_chr15	3306978	108	88	110	10	18	11	95	86	91	0	0	0	same_svim
h1_chr15	3306979	108	88	110	10	18	11	95	87	90	0	0	0	same_svim
h1_chr15	3306980	108	88	111	9	18	12	96	88	90	0	0	0	same_svim
h1_chr15	3306981	108	88	111	10	18	12	96	88	89	0	0	0	same_svim
h1_chr15	3306982	106	87	111	11	18	12	96	89	90	0	0	0	same_svim
h1_chr15	3306983	103	86	110	11	18	12	95	88	90	0	0	0	same_svim
h1_chr15	3306984	103	85	110	11	17	12	95	87	89	0	0	0	same_svim
h1_chr15	3306985	104	87	111	11	18	12	95	88	91	0	0	0	same_svim
h1_chr15	3306986	105	88	111	11	18	12	95	88	89	0	0	0	same_svim
h1_chr15	3306987	107	86	111	11	18	12	94	89	89	0	0	0	same_svim
h1_chr15	3306988	108	86	109	11	18	12	95	89	89	0	0	0	same_svim
h1_chr15	3306989	109	86	108	11	18	12	95	89	90	0	0	0	same_svim
h1_chr15	3306990	109	87	108	11	18	12	95	88	90	0	0	0	same_svim
h1_chr15	3306991	107	87	108	11	18	12	95	90	91	0	0	0	same_svim
h1_chr15	3306992	106	87	107	11	18	12	96	91	91	0	0	0	same_svim
h1_chr15	3306993	106	87	107	11	18	12	97	91	92	0	0	0	same_svim
h1_chr15	3306994	109	88	109	11	18	11	99	91	92	0	0	0	same_svim
h1_chr15	3306995	111	87	109	11	18	11	96	91	92	0	0	0	same_svim
h1_chr15	3306996	112	88	108	11	19	11	97	90	93	0	0	0	same_svim
h1_chr15	3306997	111	89	109	11	21	10	97	90	93	0	0	0	same_svim
h1_chr15	3306998	110	89	110	11	20	10	97	90	94	0	0	0	same_svim
h1_chr15	3306999	111	89	110	11	21	10	97	89	97	0	0	0	same_svim
h1_chr15	3307000	110	90	106	12	22	10	97	89	97	0	0	0	same_svim
h1_chr15	3307001	111	88	105	12	22	10	96	90	96	0	0	0	same_svim
h1_chr15	3307002	111	89	105	12	22	10	97	88	97	0	0	0	same_svim
h1_chr15	3307003	112	89	105	12	22	10	98	89	96	0	0	0	same_svim
h1_chr15	3307004	113	88	105	12	23	10	97	90	96	0	0	0	same_svim
h1_chr15	3307005	113	87	104	12	23	11	97	90	97	0	0	0	same_svim
h1_chr15	3307006	113	87	104	12	23	11	95	92	97	0	0	0	same_svim
h1_chr15	3307007	113	88	105	12	24	10	96	92	97	0	0	0	same_svim
h1_chr15	3307008	116	88	105	12	24	10	95	91	98	0	0	0	same_svim
h1_chr15	3307009	116	89	104	12	24	10	95	92	99	0	0	0	same_svim
h1_chr15	3307010	118	89	104	11	24	10	96	92	99	0	0	0	same_svim
h1_chr15	3307011	119	88	104	11	24	10	95	93	98	0	0	0	same_svim
h1_chr15	3307012	119	87	104	11	24	10	95	92	99	0	0	0	same_svim
h1_chr15	3307013	120	86	104	11	24	10	97	92	99	0	0	0	same_svim
h1_chr15	3307014	119	86	104	11	24	10	99	92	100	0	0	0	same_svim
h1_chr15	3307015	118	86	104	11	24	10	100	92	101	0	0	0	same_svim
h1_chr15	3307016	119	86	105	12	24	10	101	92	101	0	0	0	same_svim
h1_chr15	3307017	121	86	108	12	22	10	100	91	101	0	2	0	same_svim
h1_chr15	3307048	104	83	87	11	21	11	96	81	96	0	0	0	same_svim
h1_chr15	3307049	104	84	88	11	21	11	96	81	97	0	0	0	same_svim
h1_chr15	3307050	105	85	88	11	20	11	98	81	98	0	0	0	same_svim
h1_chr15	3307051	105	86	88	11	20	11	98	82	98	0	0	0	same_svim
h1_chr15	3307052	106	86	90	11	20	11	98	83	99	0	0	0	same_svim
h1_chr15	3307053	106	86	90	11	20	11	100	83	99	0	0	0	same_svim
h1_chr15	3307054	107	88	90	11	21	11	100	83	99	0	0	0	same_svim
h1_chr15	3307055	107	88	91	11	21	11	101	84	99	0	0	0	same_svim
h1_chr15	3307056	107	88	92	11	22	11	101	84	99	0	0	0	same_svim
h1_chr15	3307057	107	88	92	11	23	11	101	84	100	0	0	0	same_svim
h1_chr15	3307058	63	88	92	11	23	11	0	0	101	0	0	0	same_svim
h1_chr15	3307059	110	88	92	11	23	11	102	84	102	0	0	0	same_svim
h1_chr15	3307060	111	89	92	12	24	11	103	84	103	0	0	0	same_svim
h1_chr15	3307061	112	89	93	12	24	12	103	84	104	0	0	0	same_svim
h1_chr15	3307062	114	90	94	12	24	13	103	84	104	0	0	0	same_svim
h1_chr15	3307063	116	90	94	12	24	13	103	84	104	0	0	0	same_svim
h1_chr15	3307064	117	90	94	12	24	13	103	85	106	0	0	0	same_svim
h1_chr15	3307065	117	91	94	11	26	13	103	85	105	0	0	0	same_svim
h1_chr15	3307066	118	91	94	12	26	12	104	85	105	0	0	0	same_svim
h1_chr15	3307067	119	91	94	12	26	12	104	85	105	0	0	0	same_svim
h1_chr15	3307068	121	91	94	12	26	12	103	84	104	0	0	0	same_svim
h1_chr15	3307069	121	92	96	12	26	12	104	84	104	0	0	0	same_svim
h1_chr15	3307070	124	90	95	12	26	12	104	84	103	0	0	0	same_svim
h1_chr15	3307071	123	90	92	12	26	12	104	84	102	0	0	0	same_svim
h1_chr15	3307072	124	90	92	13	26	12	105	84	102	0	0	0	same_svim
h1_chr15	3307073	124	89	92	13	26	12	105	85	102	0	0	0	same_svim
h1_chr15	3307074	124	88	92	13	26	12	103	86	102	0	0	0	same_svim
h1_chr15	3307075	124	89	93	13	26	12	101	86	100	0	0	0	same_svim
h1_chr15	3307076	124	91	92	14	26	12	102	88	100	0	0	0	same_svim
h1_chr15	3307077	123	92	91	13	26	12	101	89	101	0	0	0	same_svim
h1_chr15	3307078	123	91	91	13	27	13	102	89	101	0	0	0	same_svim
h1_chr15	3307079	123	92	91	13	27	13	103	91	100	0	0	0	same_svim
h1_chr15	3307080	122	92	92	13	26	13	103	91	98	0	0	0	same_svim
h1_chr15	3307081	122	92	93	13	26	13	103	92	97	0	0	0	same_svim
h1_chr15	3307082	122	92	93	13	27	13	103	94	98	0	0	0	same_svim
h1_chr15	3307083	121	91	94	13	26	13	102	95	98	0	0	0	same_svim
h1_chr15	3307084	119	90	96	13	26	13	101	96	97	0	0	0	same_svim
h1_chr15	3307085	118	91	94	13	27	12	101	96	97	0	0	0	same_svim
h1_chr15	3307086	117	91	93	13	26	12	99	96	97	0	0	0	same_svim
h1_chr15	3307087	117	92	94	13	27	12	98	96	98	0	0	0	same_svim
h1_chr15	3307088	119	94	94	13	27	12	98	95	99	0	0	0	same_svim
h1_chr15	3307089	118	93	94	13	27	12	97	95	100	0	0	0	same_svim
h1_chr15	3307090	119	91	94	13	27	12	97	94	101	0	0	0	same_svim
h1_chr15	3307091	119	91	94	13	28	12	98	96	99	0	0	0	same_svim
h1_chr15	3307092	119	91	94	13	27	12	99	98	99	0	0	0	same_svim
h1_chr15	3307093	119	91	94	13	27	12	98	99	97	0	0	0	same_svim
h1_chr15	3307094	119	90	94	13	27	13	98	99	98	0	0	0	same_svim
h1_chr15	3307095	120	90	93	13	27	13	98	99	99	0	0	0	same_svim
h1_chr15	3307096	120	90	94	14	27	13	98	99	101	0	0	0	same_svim
h1_chr15	3307097	122	89	93	14	27	13	97	99	102	0	0	0	same_svim
h1_chr15	3307098	122	88	93	14	27	13	96	99	102	0	0	0	same_svim
h1_chr15	3307099	121	89	93	15	27	13	96	100	102	0	0	0	same_svim
h1_chr15	3307100	121	89	93	15	27	13	96	101	102	0	0	0	same_svim
h1_chr15	3307101	120	91	94	16	27	13	98	100	103	0	0	0	same_svim
h1_chr15	3307102	121	90	94	16	27	13	98	100	104	0	0	0	same_svim
h1_chr15	3307103	121	88	94	16	27	13	97	99	106	0	0	0	same_svim
h1_chr15	3307104	121	88	94	16	27	13	96	99	107	0	0	0	same_svim
h1_chr15	3307111	123	86	95	18	27	14	92	100	103	0	0	0	same_svim
h1_chr15	3307112	122	88	94	18	26	13	94	100	104	0	0	0	same_svim
h1_chr15	3307113	122	87	94	20	26	13	93	99	103	0	0	0	same_svim
h1_chr15	3307114	122	87	93	20	26	13	92	100	106	0	0	0	same_svim
h1_chr15	3307115	121	87	89	20	25	13	92	100	106	0	0	0	same_svim
h1_chr15	3307116	121	86	90	20	25	12	91	100	106	0	0	0	same_svim
h1_chr15	3307117	118	87	88	21	25	11	91	99	105	0	0	0	same_svim
h1_chr15	3307118	117	88	90	21	25	11	92	99	105	0	0	0	same_svim
h1_chr15	3307119	117	87	90	21	25	11	92	100	105	0	0	0	same_svim
h1_chr15	3307120	118	86	90	21	25	12	94	100	106	0	0	0	same_svim
h1_chr15	3307121	116	86	90	21	25	13	95	100	105	0	0	0	same_svim
h1_chr15	3307122	118	85	90	21	25	13	94	100	106	0	0	0	same_svim
h1_chr15	3307123	118	85	90	21	25	13	95	100	106	0	0	0	same_svim
h1_chr15	3307124	119	87	90	21	25	13	94	100	106	0	0	0	same_svim
h1_chr15	3307125	118	86	90	21	25	12	93	98	107	0	0	0	same_svim
h1_chr15	3307126	118	85	90	20	25	12	93	98	106	0	0	0	same_svim
h1_chr15	3307127	117	86	90	19	25	12	94	99	107	0	0	0	same_svim
h1_chr15	3307128	118	86	91	19	25	12	93	100	107	0	0	0	same_svim
h1_chr15	3307129	116	86	93	20	25	12	95	100	107	0	0	0	same_svim
h1_chr15	3307130	115	85	92	20	25	12	95	101	107	0	0	0	same_svim
h1_chr15	3307131	116	85	90	20	25	12	93	101	108	0	0	0	same_svim
h1_chr15	3307132	114	87	90	20	25	12	94	100	110	0	0	0	same_svim
h1_chr15	3307133	114	87	90	20	25	12	93	100	110	0	0	0	same_svim
h1_chr15	3307134	114	88	92	20	25	12	92	100	110	0	0	0	same_svim
h1_chr15	3307135	115	87	92	20	26	12	91	100	110	0	0	0	same_svim
h1_chr15	3307136	115	87	92	20	25	12	91	100	110	0	0	0	same_svim
h1_chr15	3307137	114	87	92	20	25	12	90	100	109	0	0	0	same_svim
h1_chr15	3307138	115	87	90	20	26	12	89	99	110	0	0	0	same_svim
h1_chr15	3307139	111	88	88	20	26	12	88	99	111	0	0	0	same_svim
h1_chr15	3307140	113	87	88	20	26	12	89	100	110	0	0	0	same_svim
h1_chr15	3307141	113	87	86	20	26	12	88	100	110	0	0	0	same_svim
h1_chr15	3307142	114	86	85	20	24	12	89	100	114	0	0	0	same_svim
h1_chr15	3307143	114	87	87	20	24	13	89	99	111	0	0	0	same_svim
h1_chr15	3307144	114	86	86	20	23	13	88	102	112	0	0	0	same_svim
h1_chr15	3307145	114	88	86	19	22	13	89	101	112	0	0	0	same_svim
h1_chr15	3307146	113	88	87	19	23	13	92	102	109	0	0	0	same_svim
h1_chr15	3307147	112	88	87	19	23	13	91	102	111	0	0	0	same_svim
h1_chr15	3307148	111	89	88	19	23	13	89	102	110	0	0	0	same_svim
h1_chr15	3307149	110	89	89	19	22	14	90	102	110	0	0	0	same_svim
h1_chr15	3307150	110	90	89	19	22	13	90	102	110	0	0	0	same_svim
h1_chr15	3307151	111	89	91	19	22	13	91	102	110	0	0	0	same_svim
h1_chr15	3307152	114	89	91	19	21	13	93	102	110	0	0	0	same_svim
h1_chr15	3307153	112	88	91	19	21	13	93	103	110	0	0	0	same_svim
h1_chr15	3307154	112	89	92	19	21	13	93	102	112	0	0	0	same_svim
h1_chr15	3307155	111	90	92	19	21	13	93	103	112	0	0	0	same_svim
h1_chr15	3307156	111	91	91	19	21	13	93	103	111	0	0	0	same_svim
h1_chr15	3307157	111	91	91	19	21	14	94	103	111	0	0	0	same_svim
h1_chr15	3307158	110	92	91	20	22	14	93	103	112	0	0	0	same_svim
h1_chr15	3307159	110	91	91	20	22	13	91	105	114	0	0	0	same_svim
h1_chr15	3307160	110	92	91	21	22	13	91	105	115	0	0	0	same_svim
h1_chr15	3307161	112	92	91	20	23	13	90	104	115	0	0	0	same_svim
h1_chr15	3307162	111	92	91	20	23	13	94	106	115	0	0	0	same_svim
h1_chr15	3307163	111	93	90	20	23	13	94	106	115	0	0	0	same_svim
h1_chr15	3307164	111	90	92	20	23	13	94	105	114	0	0	0	same_svim
h1_chr15	3307165	110	90	93	20	24	13	94	107	114	0	0	0	same_svim
h1_chr15	3307166	110	90	93	20	24	13	94	105	111	0	0	0	same_svim
h1_chr15	3307167	109	89	93	20	24	13	93	106	111	0	0	0	same_svim
h1_chr15	3307168	109	89	93	21	25	12	92	106	111	0	0	0	same_svim
h1_chr15	3307169	109	90	91	21	25	12	92	106	111	0	0	0	same_svim
h1_chr15	3307170	110	89	92	22	25	12	93	104	111	0	0	0	same_svim
h1_chr15	3307171	110	90	92	22	25	12	91	102	112	0	0	0	same_svim
h1_chr15	3307172	110	92	93	22	25	13	91	102	111	0	0	0	same_svim
h1_chr15	3307173	111	92	94	22	26	13	91	102	111	0	0	0	same_svim
h1_chr15	3307174	112	91	92	22	26	13	88	102	113	0	0	0	same_svim
h1_chr15	3307175	112	92	92	22	26	13	89	102	114	0	0	0	same_svim
h1_chr15	3307176	112	92	90	22	26	13	90	102	112	0	0	0	same_svim
h1_chr15	3307177	112	92	91	22	26	13	88	100	110	0	0	0	same_svim
h1_chr15	3307178	109	94	89	22	26	14	87	99	110	0	0	0	same_svim
h1_chr15	3307179	109	92	88	22	26	14	89	101	107	0	0	0	same_svim
h1_chr15	3307180	110	92	87	22	26	14	89	102	107	0	0	0	same_svim
h1_chr15	3307181	108	92	87	22	26	14	90	100	107	0	0	0	same_svim
h1_chr15	3307182	107	89	85	22	26	14	88	100	107	0	0	0	same_svim
h1_chr15	3307183	106	88	85	22	26	14	90	99	107	0	0	0	same_svim
h1_chr15	3307184	103	93	88	22	26	14	89	99	103	0	0	0	same_svim
h1_chr15	3307185	103	93	88	23	26	14	87	98	103	0	0	0	same_svim
h1_chr15	3307186	105	93	89	23	26	14	89	98	102	0	0	0	same_svim
h1_chr15	3307187	105	93	88	23	26	14	89	98	102	0	0	0	same_svim
h1_chr15	3307188	105	92	91	23	26	13	88	98	102	0	0	0	same_svim
h1_chr15	3307189	105	89	90	23	25	13	88	96	103	0	0	0	same_svim
h1_chr15	3307190	106	90	90	23	25	13	89	96	103	0	0	0	same_svim
h1_chr15	3307191	106	93	90	23	25	13	90	96	103	0	0	0	same_svim
h1_chr15	3307192	105	93	90	22	25	13	90	96	103	0	0	0	same_svim
h1_chr15	3307193	104	92	92	20	25	13	91	96	103	0	0	0	same_svim
h1_chr15	3307194	104	92	93	20	25	13	92	96	103	0	0	0	same_svim
h1_chr15	3307195	106	93	94	20	25	13	93	96	102	0	0	0	same_svim
h1_chr15	3307196	107	93	95	20	25	13	93	96	102	0	0	0	same_svim
h1_chr15	3307197	107	91	97	20	23	13	93	94	103	0	0	0	same_svim
h1_chr15	3307198	106	92	97	21	23	12	93	94	106	0	0	0	same_svim
h1_chr15	3307199	104	92	97	21	23	12	91	94	107	0	0	0	same_svim
h1_chr15	3307200	105	91	97	21	23	12	92	93	107	0	0	0	same_svim
h1_chr15	3307201	107	90	97	21	23	12	91	92	108	0	0	0	same_svim
h1_chr15	3307202	108	93	96	21	23	12	92	94	109	0	0	0	same_svim
h1_chr15	3307203	109	94	96	21	23	12	91	94	110	0	0	0	same_svim
h1_chr15	3307204	109	92	97	21	23	12	90	94	111	0	0	0	same_svim
h1_chr15	3307205	109	92	96	21	22	12	92	94	112	0	0	0	same_svim
h1_chr15	3307206	110	92	95	21	22	12	92	94	112	0	0	0	same_svim
h1_chr15	3307207	109	93	95	21	21	12	94	93	112	0	0	0	same_svim
h1_chr15	3307208	108	95	95	21	20	12	94	93	111	0	0	0	same_svim
h1_chr15	3307209	107	96	95	21	21	12	93	94	110	0	0	0	same_svim
h1_chr15	3307210	106	55	53	21	21	12	91	94	5	0	0	0	same_svim
h1_chr15	3307211	105	96	98	21	20	13	92	94	108	0	0	0	same_svim
h1_chr15	3307212	103	95	99	21	20	12	92	94	109	0	0	0	same_svim
h1_chr15	3307213	102	96	100	21	20	11	93	94	110	0	0	0	same_svim
h1_chr15	3307214	102	95	101	21	20	11	93	94	106	0	0	0	same_svim
h1_chr15	3307215	102	94	100	21	20	11	94	94	107	0	0	0	same_svim
h1_chr15	3307216	102	94	102	21	18	11	94	95	108	0	0	0	same_svim
h1_chr15	3307217	101	94	102	21	18	11	94	96	108	0	0	0	same_svim
h1_chr15	3307218	99	94	104	21	19	11	94	96	109	0	0	0	same_svim
h1_chr15	3307219	98	98	102	21	20	12	93	97	109	0	0	0	same_svim
h1_chr15	3307220	97	99	102	21	20	12	94	96	110	0	0	0	same_svim
h1_chr15	3307221	98	99	102	21	20	12	96	96	112	0	0	0	same_svim
h1_chr15	3307222	97	100	104	21	20	12	94	97	112	0	0	0	same_svim
h1_chr15	3307223	96	101	104	20	20	12	94	96	112	0	0	0	same_svim
h1_chr15	3307224	96	101	105	20	20	12	95	95	113	0	0	0	same_svim
h1_chr15	3307225	95	101	104	21	20	12	95	96	113	0	0	0	same_svim
h1_chr15	3307226	95	100	104	22	20	12	96	95	114	0	0	0	same_svim
h1_chr15	3307227	96	99	104	21	20	12	96	97	114	0	0	0	same_svim
h1_chr15	3307228	96	99	103	21	20	12	97	96	113	0	0	0	same_svim
h1_chr15	3307229	95	97	102	21	19	11	97	98	115	0	0	0	same_svim
h1_chr15	3307230	95	97	100	22	19	11	97	101	115	0	0	0	same_svim
h1_chr15	3307231	95	98	99	22	19	12	97	100	116	0	0	0	same_svim
h1_chr15	3307232	95	100	99	23	20	12	97	100	116	0	0	0	same_svim
h1_chr15	3307233	96	100	98	23	19	12	97	98	115	0	0	0	same_svim
h1_chr15	3307234	97	101	96	23	19	12	99	98	115	0	0	0	same_svim
h1_chr15	3307235	97	101	95	23	19	13	101	98	115	0	0	0	same_svim
h1_chr15	3307236	96	101	95	23	18	13	101	99	117	0	0	0	same_svim
h1_chr15	3307237	96	101	97	23	19	13	101	97	119	0	0	0	same_svim
h1_chr15	3307238	95	101	96	23	18	13	102	96	118	0	0	0	same_svim
h1_chr15	3307239	96	99	96	23	18	13	102	96	117	0	0	0	same_svim
h1_chr15	3307240	94	99	97	23	18	13	103	97	117	0	0	0	same_svim
h1_chr15	3307241	93	98	98	23	18	13	102	98	118	0	0	0	same_svim
h1_chr15	3307242	93	98	100	23	17	13	102	101	118	0	0	0	same_svim
h1_chr15	3307243	94	98	100	23	17	13	102	102	117	0	0	0	same_svim
h1_chr15	3307244	94	98	100	23	17	13	101	103	118	0	0	0	same_svim
h1_chr15	3307245	94	96	100	23	17	12	104	103	117	0	0	0	same_svim
h1_chr15	3307246	94	96	99	23	17	12	106	104	117	0	0	0	same_svim
h1_chr15	3307247	92	98	100	22	17	12	109	104	115	0	0	0	same_svim
h1_chr15	3307248	93	99	101	22	17	12	109	105	114	0	0	0	same_svim
h1_chr15	3307249	94	99	101	22	19	12	110	104	114	0	0	0	same_svim
h1_chr15	3307250	94	99	101	21	19	12	110	103	114	0	0	0	same_svim
h1_chr15	3307251	94	95	100	21	19	12	109	103	115	0	0	0	same_svim
h1_chr15	3307252	93	95	101	20	19	12	109	102	115	0	0	0	same_svim
h1_chr15	3307253	93	95	101	20	19	12	110	102	115	0	0	0	same_svim
h1_chr15	3307254	93	94	101	20	19	13	111	103	113	0	0	0	same_svim
h1_chr15	3307255	93	94	99	20	19	13	111	102	111	0	0	0	same_svim
h1_chr15	3307256	95	93	99	20	20	13	111	101	110	0	0	0	same_svim
h1_chr15	3307257	93	91	98	19	21	13	111	100	110	0	0	0	same_svim
h1_chr15	3307258	94	91	98	19	21	12	111	100	108	0	0	0	same_svim
h1_chr15	3307259	93	94	100	19	21	12	110	100	108	0	0	0	same_svim
h1_chr15	3307260	92	93	99	19	21	12	110	100	108	0	0	0	same_svim
h1_chr15	3307261	90	94	99	18	21	12	107	100	107	0	0	0	same_svim
h1_chr15	3307262	89	92	99	18	20	12	106	100	104	0	0	0	same_svim
h1_chr15	3307263	90	92	101	18	20	12	106	100	104	0	0	0	same_svim
h1_chr15	3307264	90	92	100	16	20	12	107	99	104	0	0	0	same_svim
h1_chr15	3307265	89	92	99	16	20	12	107	101	102	0	0	0	same_svim
h1_chr15	3307266	89	92	98	16	20	12	107	100	101	0	0	0	same_svim
h1_chr15	3307267	90	93	98	17	20	13	108	100	102	0	0	0	same_svim
h1_chr15	3307268	90	93	98	16	20	13	108	102	103	0	0	0	same_svim
h1_chr15	3307269	89	94	99	17	20	13	108	102	104	0	0	0	same_svim
h1_chr15	3307270	90	95	100	17	20	13	108	102	105	0	0	0	same_svim
h1_chr15	3307271	92	96	100	18	20	13	106	102	105	0	0	0	same_svim
h1_chr15	3307272	93	97	100	18	20	13	106	102	108	0	0	0	same_svim
h1_chr15	3307273	92	97	100	18	20	13	105	101	109	0	0	0	same_svim
h1_chr15	3307274	93	98	99	18	20	13	105	102	109	0	0	0	same_svim
h1_chr15	3307275	94	96	100	18	20	13	106	102	109	0	0	0	same_svim
h1_chr15	3307276	93	96	101	18	20	13	106	102	108	0	0	0	same_svim
h1_chr15	3307277	93	97	101	18	20	13	105	103	108	0	0	0	same_svim
h1_chr15	3307278	94	96	100	19	20	13	106	102	108	0	0	0	same_svim
h1_chr15	3307279	94	97	97	19	21	13	105	101	110	0	0	0	same_svim
h1_chr15	3307280	95	98	96	18	22	13	105	102	109	0	0	0	same_svim
h1_chr15	3307281	94	98	97	20	22	13	105	102	109	0	0	0	same_svim
h1_chr15	3307282	93	99	98	20	22	14	104	102	109	0	0	0	same_svim
h1_chr15	3307283	92	98	98	20	22	14	106	102	105	0	0	0	same_svim
h1_chr15	3307284	92	96	101	20	22	14	107	102	106	0	0	0	same_svim
h1_chr15	3307285	92	96	100	21	22	14	107	102	106	0	0	0	same_svim
h1_chr15	3307286	92	97	101	21	21	14	108	102	106	0	0	0	same_svim
h1_chr15	3307287	93	98	102	21	21	14	109	103	109	0	0	0	same_svim
h1_chr15	3307288	92	97	102	21	21	14	109	103	110	0	0	0	same_svim
h1_chr15	3307289	92	97	101	23	20	14	112	103	109	0	0	0	same_svim
h1_chr15	3307290	92	98	101	23	20	14	113	101	109	0	0	0	same_svim
h1_chr15	3307291	91	97	102	23	20	14	114	102	110	0	0	0	same_svim
h1_chr15	3307292	90	96	102	23	20	14	115	102	111	0	0	0	same_svim
h1_chr15	3307293	89	95	101	23	20	14	115	102	106	0	0	0	same_svim
h1_chr15	3307294	88	96	100	23	20	13	115	102	107	0	0	0	same_svim
h1_chr15	3307295	89	95	102	24	20	13	115	103	106	0	0	0	same_svim
h1_chr15	3307296	88	95	101	24	20	13	112	103	107	0	0	0	same_svim
h1_chr15	3307297	88	95	101	24	20	13	113	104	109	0	0	0	same_svim
h1_chr15	3307298	90	95	101	24	19	13	113	104	108	0	0	0	same_svim
h1_chr15	3307299	90	95	99	24	19	13	114	103	108	0	0	0	same_svim
h1_chr15	3307300	92	96	101	24	19	12	116	102	107	0	0	0	same_svim
h1_chr15	3307301	93	96	103	25	21	12	116	102	106	0	0	0	same_svim
h1_chr15	3307302	91	98	102	25	21	12	113	102	107	0	0	0	same_svim
h1_chr15	3307303	91	98	101	25	21	12	115	103	107	0	0	0	same_svim
h1_chr15	3307304	93	98	101	25	21	12	117	103	107	0	0	0	same_svim
h1_chr15	3307305	94	97	101	25	21	12	116	103	106	0	0	0	same_svim
h1_chr15	3307306	94	97	101	25	21	12	116	103	107	0	0	0	same_svim
h1_chr15	3307307	96	97	102	25	22	12	115	102	108	0	0	0	same_svim
h1_chr15	3307308	97	97	102	25	22	11	115	102	108	0	0	0	same_svim
h1_chr15	3307309	97	98	102	24	21	11	118	103	109	0	0	0	same_svim
h1_chr15	3307310	96	96	101	24	21	11	119	103	108	0	0	0	same_svim
h1_chr15	3307311	93	97	100	23	21	11	119	104	108	0	0	0	same_svim
h1_chr15	3307312	94	98	100	23	20	12	116	105	108	0	0	0	same_svim
h1_chr15	3307313	94	99	100	23	20	12	116	106	108	0	0	0	same_svim
h1_chr15	3307314	94	101	101	23	20	13	117	107	108	0	0	0	same_svim
h1_chr15	3307315	94	101	100	24	21	13	117	107	109	0	0	0	same_svim
h1_chr15	3307316	94	101	99	24	20	13	118	107	109	0	0	0	same_svim
h1_chr15	3307317	94	101	99	25	20	13	118	108	109	0	0	0	same_svim
h1_chr15	3307318	96	102	98	25	20	13	120	109	110	0	0	0	same_svim
h1_chr15	3307319	97	102	97	24	19	13	122	109	109	0	0	0	same_svim
h1_chr15	3307320	96	101	96	24	19	13	121	109	109	0	0	0	same_svim
h1_chr15	3307321	96	104	94	23	19	13	120	108	108	0	0	0	same_svim
h1_chr15	3307322	97	105	94	23	19	13	122	108	110	0	0	0	same_svim
h1_chr15	3307323	96	105	94	23	19	12	123	108	109	0	0	0	same_svim
h1_chr15	3307324	94	105	94	23	18	12	123	107	107	0	0	0	same_svim
h1_chr15	3307325	95	106	93	23	18	12	123	106	105	0	0	0	same_svim
h1_chr15	3307326	94	104	92	23	18	12	124	106	104	0	0	0	same_svim
h1_chr15	3307327	94	104	92	23	18	12	125	104	104	0	0	0	same_svim
h1_chr15	3307328	94	105	92	23	20	12	126	103	104	0	0	0	same_svim
h1_chr15	3307329	94	104	93	24	20	11	124	104	106	0	0	0	same_svim
h1_chr15	3307330	96	103	95	24	20	11	124	103	106	0	0	0	same_svim
h1_chr15	3307331	96	104	96	24	20	11	123	102	106	0	0	0	same_svim
h1_chr15	3307332	97	104	96	25	21	11	124	101	108	0	0	0	same_svim
h1_chr15	3307333	98	104	95	25	21	11	120	99	108	0	0	0	same_svim
h1_chr15	3307334	97	104	95	25	21	12	121	98	108	0	0	0	same_svim
h1_chr15	3307335	97	102	96	25	22	12	121	98	109	0	0	0	same_svim
h1_chr15	3307336	95	102	96	24	22	12	119	98	111	0	0	0	same_svim
h1_chr15	3307337	95	103	95	24	23	12	120	98	111	0	0	0	same_svim
h1_chr15	3307338	95	104	95	24	23	12	120	96	112	0	0	0	same_svim
h1_chr15	3307339	96	105	93	24	23	12	121	98	113	0	0	0	same_svim
h1_chr15	3307340	95	104	92	24	23	12	121	98	113	0	0	0	same_svim
h1_chr15	3307341	95	102	93	24	24	12	120	98	113	0	0	0	same_svim
h1_chr15	3307342	98	101	94	24	24	12	123	97	113	0	0	0	same_svim
h1_chr15	3307343	98	101	94	24	24	12	122	96	113	0	0	0	same_svim
h1_chr15	3307344	98	101	93	24	24	12	121	95	113	0	0	0	same_svim
h1_chr15	3307345	97	101	92	23	24	12	121	96	112	0	0	0	same_svim
h1_chr15	3307346	97	99	92	23	24	13	122	96	113	0	0	0	same_svim
h1_chr15	3307347	98	99	91	23	24	13	123	96	114	0	0	0	same_svim
h1_chr15	3307348	98	99	94	23	24	13	123	97	113	0	0	0	same_svim
h1_chr15	3307349	98	100	93	23	23	13	125	97	111	0	0	0	same_svim
h1_chr15	3307350	96	99	94	23	23	13	125	97	109	0	0	0	same_svim
h1_chr15	3307351	95	99	94	24	23	13	125	96	108	0	0	0	same_svim
h1_chr15	3307352	94	99	95	24	23	13	124	96	108	0	0	0	same_svim
h1_chr15	3307353	93	96	95	24	23	13	125	96	108	0	0	0	same_svim
h1_chr15	3307354	93	95	94	24	23	13	127	96	108	0	0	0	same_svim
h1_chr15	3307355	94	95	95	24	23	14	125	97	108	0	0	0	same_svim
h1_chr15	3307356	93	96	95	24	23	14	125	98	107	0	0	0	same_svim
h1_chr15	3307357	94	95	95	24	23	14	124	98	107	0	0	0	same_svim
h1_chr15	3307358	95	95	95	24	23	14	124	98	107	0	0	0	same_svim
h1_chr15	3307359	96	94	95	24	23	14	125	98	108	0	0	0	same_svim
h1_chr15	3307360	97	97	92	24	22	14	125	98	108	0	0	0	same_svim
h1_chr15	3307361	97	96	91	25	22	14	125	98	108	0	0	0	same_svim
h1_chr15	3307362	97	97	90	24	22	14	125	99	107	0	0	0	same_svim
h1_chr15	3307363	97	96	89	24	22	14	125	102	106	0	0	0	same_svim
h1_chr15	3307364	96	97	88	24	22	14	125	101	107	0	0	0	same_svim
h1_chr15	3307365	98	98	88	24	22	14	124	100	106	0	0	0	same_svim
h1_chr15	3307366	97	99	87	24	22	14	125	100	105	0	0	0	same_svim
h1_chr15	3307367	97	99	88	25	22	14	125	101	106	0	0	0	same_svim
h1_chr15	3307368	97	99	86	24	22	14	126	100	105	0	0	0	same_svim
h1_chr15	3307369	98	95	87	24	21	14	126	101	105	0	0	0	same_svim
h1_chr15	3307370	96	94	87	24	20	13	126	100	105	0	0	0	same_svim
h1_chr15	3307371	95	95	87	25	20	14	124	100	103	0	0	0	same_svim
h1_chr15	3307372	94	94	85	25	20	15	124	100	103	0	0	0	same_svim
h1_chr15	3307373	94	95	85	25	20	15	124	100	105	0	0	0	same_svim
h1_chr15	3307374	94	96	84	25	20	15	124	100	104	0	0	0	same_svim
h1_chr15	3307375	95	95	84	25	20	15	126	100	104	0	0	0	same_svim
h1_chr15	3307376	95	96	85	24	20	15	125	100	105	0	0	0	same_svim
h1_chr15	3307377	95	97	86	23	20	15	126	99	106	0	0	0	same_svim
h1_chr15	3307378	97	96	87	23	20	15	124	98	106	0	0	0	same_svim
h1_chr15	3307379	97	96	86	24	20	15	123	97	105	0	0	0	same_svim
h1_chr15	3307380	98	96	88	24	20	16	123	100	106	0	0	0	same_svim
h1_chr15	3307381	97	94	88	23	20	16	123	99	106	0	0	0	same_svim
h1_chr15	3307382	98	95	87	23	22	16	123	100	105	0	0	0	same_svim
h1_chr15	3307383	97	95	89	22	21	16	122	100	105	0	0	0	same_svim
h1_chr15	3307384	96	95	90	22	21	16	121	100	106	0	0	0	same_svim
h1_chr15	3307385	97	94	90	22	21	16	120	100	109	0	0	0	same_svim
h1_chr15	3307386	97	95	90	22	21	15	120	100	107	0	0	0	same_svim
h1_chr15	3307387	98	96	88	22	21	15	120	100	107	0	0	0	same_svim
h1_chr15	3307388	98	96	91	22	22	15	119	100	108	0	0	0	same_svim
h1_chr15	3307389	97	99	91	22	22	15	119	100	109	0	0	0	same_svim
h1_chr15	3307390	97	101	90	22	22	15	119	100	109	0	0	0	same_svim
h1_chr15	3307391	97	101	89	23	23	15	120	99	109	0	0	0	same_svim
h1_chr15	3307392	96	101	89	23	23	15	119	99	110	0	0	0	same_svim
h1_chr15	3307393	95	102	90	23	23	15	121	100	111	0	0	0	same_svim
h1_chr15	3307394	97	104	91	23	23	15	122	100	110	0	0	0	same_svim
h1_chr15	3307395	96	104	91	23	23	16	121	98	110	0	0	0	same_svim
h1_chr15	3307396	96	104	91	23	23	17	119	98	112	0	0	0	same_svim
h1_chr15	3307397	96	103	88	23	24	18	116	98	112	0	0	0	same_svim
h1_chr15	3307398	97	102	88	23	26	18	116	98	112	0	0	0	same_svim
h1_chr15	3307399	97	101	88	23	26	18	115	98	110	0	0	0	same_svim
h1_chr15	3307400	97	101	89	23	24	18	114	98	112	0	0	0	same_svim
h1_chr15	3307401	97	101	90	23	25	18	113	98	112	0	0	0	same_svim
h1_chr15	3307402	97	99	91	23	25	18	113	98	112	0	0	0	same_svim
h1_chr15	3307403	99	100	94	23	27	18	111	99	111	0	0	0	same_svim
h1_chr15	3307404	100	101	94	23	27	18	110	98	111	0	0	0	same_svim
h1_chr15	3307405	99	101	94	23	27	17	111	99	111	0	0	0	same_svim
h1_chr15	3307406	98	100	95	23	27	17	111	100	111	0	0	0	same_svim
h1_chr15	3307407	99	101	95	23	26	17	112	101	110	0	0	0	same_svim
h1_chr15	3307408	99	103	95	23	25	17	111	101	111	0	0	0	same_svim
h1_chr15	3307409	99	100	93	23	26	17	112	101	110	0	0	0	same_svim
h1_chr15	3307410	99	100	94	23	26	17	113	100	111	0	0	0	same_svim
h1_chr15	3307411	100	102	96	22	26	17	114	101	110	0	0	0	same_svim
h1_chr15	3307412	100	102	97	22	26	17	114	104	110	0	0	0	same_svim
h1_chr15	3307413	98	102	96	22	26	18	115	102	112	0	0	0	same_svim
h1_chr15	3307414	98	102	96	22	28	18	114	102	112	0	0	0	same_svim
h1_chr15	3307415	99	104	95	23	28	18	116	102	111	0	0	0	same_svim
h1_chr15	3307416	99	104	95	23	28	18	115	100	112	0	0	0	same_svim
h1_chr15	3307417	98	103	97	23	28	18	115	100	111	0	0	0	same_svim
h1_chr15	3307418	98	103	96	22	28	17	114	100	110	0	0	0	same_svim
h1_chr15	3307419	97	103	96	22	28	17	113	99	109	0	0	0	same_svim
h1_chr15	3307420	95	102	95	21	28	17	112	100	108	0	0	0	same_svim
h1_chr15	3307421	94	101	95	21	28	17	114	100	107	0	0	0	same_svim
h1_chr15	3307422	92	100	95	20	29	16	113	100	104	0	0	0	same_svim
h1_chr15	3307423	92	103	94	20	29	15	114	103	102	0	0	0	same_svim
h1_chr15	3307424	90	102	94	20	29	15	114	103	101	0	0	0	same_svim
h1_chr15	3307425	89	102	93	20	29	15	113	103	102	0	0	0	same_svim
h1_chr15	3307426	89	103	93	20	29	16	110	102	102	0	0	0	same_svim
h1_chr15	3307427	89	103	93	20	29	16	112	102	102	0	0	0	same_svim
h1_chr15	3307428	87	102	93	20	29	16	112	102	101	0	0	0	same_svim
h1_chr15	3307429	81	100	93	19	29	16	110	102	99	0	0	0	same_svim
h1_chr15	3307430	80	97	93	19	28	16	110	100	98	0	0	0	same_svim
h1_chr15	3307431	79	96	88	18	27	16	110	100	97	0	0	0	same_svim
h1_chr15	3307432	79	95	88	16	27	16	110	101	98	0	0	0	same_svim
h1_chr15	3307433	80	94	89	16	27	15	109	101	97	0	0	0	same_svim
h1_chr15	3307434	83	99	90	16	27	15	111	106	100	0	0	0	same_svim
h1_chr15	3307435	83	99	90	16	28	15	111	106	100	0	0	0	same_svim
h1_chr15	3307436	84	101	92	16	29	16	113	107	100	0	0	0	same_svim
h1_chr15	3307437	86	101	93	16	29	16	112	108	97	0	0	0	same_svim
h1_chr15	3307438	86	101	92	16	30	16	113	110	97	2	0	0	same_svim
h1_chr15	3307439	94	100	93	17	30	16	109	110	97	2	0	0	same_svim
h1_chr15	3307440	94	99	94	15	30	16	108	109	97	2	0	0	same_svim
h1_chr15	3307441	94	99	93	15	30	16	110	109	97	2	0	0	same_svim
h1_chr15	3307442	95	100	94	15	30	16	109	109	96	2	0	0	same_svim
h1_chr15	3307443	95	100	95	15	30	16	109	109	98	2	0	0	same_svim
h1_chr15	3307444	95	99	95	16	30	16	110	110	98	2	0	0	same_svim
h1_chr15	3307445	95	100	95	17	30	16	109	111	98	2	0	0	same_svim
h1_chr15	3307446	97	99	94	16	30	16	111	111	97	2	0	0	same_svim
h1_chr15	3307447	98	98	96	16	31	16	110	112	96	2	0	0	same_svim
h1_chr15	3307448	98	97	96	16	30	16	111	113	96	2	0	0	same_svim
h1_chr15	3307449	98	97	97	16	30	16	110	113	97	2	0	0	same_svim
h1_chr15	3307450	97	97	96	16	30	16	108	113	97	2	0	0	same_svim
h1_chr15	3307451	95	97	93	16	30	16	108	113	97	2	0	0	same_svim
h1_chr15	3307452	92	95	93	15	28	16	108	114	97	2	0	0	same_svim
h1_chr15	3307453	93	95	93	15	28	16	106	112	96	2	0	0	same_svim
h1_chr15	3307454	92	94	93	15	28	16	105	112	95	2	0	0	same_svim
h1_chr15	3307455	91	94	92	15	28	16	106	112	95	2	0	0	same_svim
h1_chr15	3307456	92	93	93	15	28	17	106	112	93	2	0	0	same_svim
h1_chr15	3307457	90	93	93	16	28	17	108	112	93	2	0	0	same_svim
h1_chr15	3307458	91	97	100	17	27	17	109	112	96	2	0	0	same_svim
h1_chr15	3307459	92	96	99	17	27	17	106	112	96	2	0	0	same_svim
h1_chr15	3307460	91	96	99	17	27	17	104	111	97	2	0	0	same_svim
h1_chr15	3307461	92	97	99	17	27	17	103	111	96	1	0	0	same_svim
h1_chr15	3307462	92	97	99	17	27	17	102	111	97	1	0	0	same_svim
h1_chr15	3307463	92	96	99	17	27	17	103	111	97	1	0	0	same_svim
h1_chr15	3307464	92	94	97	17	28	18	104	112	97	1	0	0	same_svim
h1_chr15	3307465	91	95	98	17	28	18	104	112	98	0	0	0	same_svim
h1_chr15	3307466	91	97	100	16	27	19	103	112	98	0	0	0	same_svim
h1_chr15	3307467	91	96	99	16	27	19	100	110	98	0	0	0	same_svim
h1_chr15	3307468	90	96	99	15	27	19	98	110	97	0	0	0	same_svim
h1_chr15	3307469	89	96	100	15	28	20	97	109	98	0	0	0	same_svim
h1_chr15	3307470	89	96	100	15	29	20	98	109	98	0	0	0	same_svim
h1_chr15	3307471	91	93	101	15	29	21	99	109	97	0	0	0	same_svim
h1_chr15	3307472	92	91	102	15	29	21	97	108	95	0	0	0	same_svim
h1_chr15	3307473	93	90	102	15	29	21	96	108	95	0	0	0	same_svim
h1_chr15	3307474	93	91	101	15	31	21	97	108	95	0	0	0	same_svim
h1_chr15	3307475	92	90	102	15	31	21	96	109	96	0	0	0	same_svim
h1_chr15	3307476	93	90	103	15	32	21	96	107	97	0	0	0	same_svim
h1_chr15	3307477	91	93	104	15	32	21	98	107	98	0	0	0	same_svim
h1_chr15	3307478	93	93	105	15	33	21	98	106	101	0	0	0	same_svim
h1_chr15	3307479	93	93	104	15	31	21	98	106	99	0	0	0	same_svim
h1_chr15	3307480	91	93	103	14	31	21	99	104	98	0	0	0	same_svim
h1_chr15	3307481	91	92	102	14	31	21	99	101	100	0	0	0	same_svim
h1_chr15	3307482	91	91	101	14	31	21	99	101	98	0	0	0	same_svim
h1_chr15	3307483	88	85	95	13	30	21	99	103	96	0	0	0	same_svim
h1_chr15	3307484	88	84	94	13	29	21	99	106	98	0	0	0	same_svim
h1_chr15	3307485	88	84	93	13	29	20	102	107	99	0	0	0	same_svim
h1_chr15	3307486	88	82	93	13	28	20	102	108	98	0	0	0	same_svim
h1_chr15	3307487	89	81	93	13	28	20	101	108	99	0	0	0	same_svim
h1_chr15	3307488	91	81	93	13	27	20	101	109	99	0	0	0	same_svim
h1_chr15	3307489	92	81	92	13	27	20	100	109	99	0	0	0	same_svim
h1_chr15	3307490	93	81	92	13	28	20	101	109	98	0	0	0	same_svim
h1_chr15	3307491	93	82	91	13	28	20	103	110	98	0	0	0	same_svim
h1_chr15	3307492	91	82	91	13	27	21	100	109	99	0	0	0	same_svim
h1_chr15	3307493	91	83	90	13	27	21	100	107	100	0	0	0	same_svim
h1_chr15	3307494	91	84	90	13	27	21	101	107	101	0	0	0	same_svim
h1_chr15	3307495	91	85	89	13	29	21	101	107	102	0	0	0	same_svim
h1_chr15	3307496	91	86	88	13	29	21	101	108	102	0	0	0	same_svim
h1_chr15	3307497	90	86	87	13	29	20	100	108	101	0	0	0	same_svim
h1_chr15	3307498	90	86	85	13	31	20	103	107	101	0	0	0	same_svim
h1_chr15	3307499	90	84	85	13	31	20	102	107	100	0	0	0	same_svim
h1_chr15	3307500	91	84	84	12	31	20	101	107	101	0	0	0	same_svim
h1_chr15	3307501	90	85	84	12	31	20	102	107	101	0	0	0	same_svim
h1_chr15	3307502	90	85	83	11	32	21	102	107	100	0	0	0	same_svim
h1_chr15	3307503	90	85	82	11	33	22	103	106	99	0	0	0	same_svim
h1_chr15	3307504	90	85	82	11	33	22	100	106	98	0	0	0	same_svim
h1_chr15	3307505	89	84	82	12	34	21	100	106	97	0	0	0	same_svim
h1_chr15	3307506	89	84	82	12	34	21	100	106	97	0	0	0	same_svim
h1_chr15	3307507	88	83	82	12	35	21	99	106	98	0	0	0	same_svim
h1_chr15	3307508	87	81	82	12	36	21	99	106	96	0	0	0	same_svim
h1_chr15	3307509	88	79	82	12	36	21	98	106	96	0	0	0	same_svim
h1_chr15	3307510	85	64	74	12	37	21	98	106	96	0	0	0	same_svim
h1_chr15	3307511	85	63	73	11	37	21	98	107	96	0	0	0	same_svim
h1_chr15	3307512	85	63	73	11	37	20	98	107	96	0	0	0	same_svim
h1_chr15	3307513	87	63	73	11	37	20	97	108	96	0	0	0	same_svim
h1_chr15	3307514	88	62	73	11	37	20	98	108	95	0	0	0	same_svim
h1_chr15	3307515	87	42	49	11	37	20	98	109	95	0	0	0	same_svim
h1_chr15	3307516	87	41	47	11	37	20	96	107	95	0	0	0	same_svim
h1_chr15	3307517	88	41	47	10	38	20	96	107	94	0	0	0	same_svim
h1_chr15	3307518	88	61	71	10	38	20	95	107	94	0	0	0	same_svim
h1_chr15	3307519	87	56	64	10	38	20	95	105	77	0	0	0	same_svim
h1_chr15	3307520	87	55	64	10	38	20	94	105	76	0	0	0	same_svim
h1_chr15	3307521	86	55	64	9	38	19	90	104	76	0	0	0	same_svim
h1_chr15	3307522	86	55	64	9	38	18	90	105	76	0	0	0	same_svim
h1_chr15	3307523	87	55	65	11	41	20	96	109	76	0	0	0	same_svim
h1_chr15	3307524	87	56	66	11	41	20	96	109	76	0	0	0	same_svim
h1_chr15	3307525	89	56	67	12	42	20	97	109	76	0	0	0	same_svim
h1_chr15	3307526	90	58	69	13	42	20	98	109	78	0	0	0	same_svim
h1_chr15	3307527	90	58	69	13	42	20	98	109	78	0	0	0	same_svim
h1_chr15	3307528	89	74	89	13	42	20	98	108	78	0	0	0	same_svim
h1_chr15	3307529	89	74	89	13	42	20	99	108	78	0	0	0	same_svim
h1_chr15	3307530	89	75	87	13	42	19	101	108	77	0	0	0	same_svim
h1_chr15	3307531	89	75	87	13	42	20	100	107	78	0	0	0	same_svim
h1_chr15	3307532	89	88	100	13	41	19	100	108	92	0	0	0	same_svim
h1_chr15	3307533	91	88	102	14	40	19	101	108	93	0	0	0	same_svim
h1_chr15	3307534	92	90	105	14	40	19	102	107	94	0	0	0	same_svim
h1_chr15	3307535	91	90	106	14	40	21	101	107	95	0	0	0	same_svim
h1_chr15	3307536	92	91	106	14	40	21	102	108	96	0	0	0	same_svim
h1_chr15	3307537	92	91	106	14	40	21	104	108	101	0	0	0	same_svim
h1_chr15	3307538	91	92	108	14	38	21	105	107	101	0	0	0	same_svim
h1_chr15	3307539	93	93	109	14	38	21	104	108	103	0	0	0	same_svim
h1_chr15	3307540	94	93	110	15	38	21	105	107	102	0	0	0	same_svim
h1_chr15	3307541	94	94	110	14	38	22	104	107	100	0	0	0	same_svim
h1_chr15	3307542	96	94	110	14	39	22	105	106	99	0	0	0	same_svim
h1_chr15	3307543	96	95	109	14	40	22	102	106	98	0	0	0	same_svim
h1_chr15	3307544	95	97	109	14	40	22	102	106	98	0	0	0	same_svim
h1_chr15	3307545	97	97	109	14	40	21	100	106	99	0	0	0	same_svim
h1_chr15	3307546	97	98	110	14	41	20	101	106	96	0	0	0	same_svim
h1_chr15	3307547	98	97	110	14	40	19	103	107	98	0	0	0	same_svim
h1_chr15	3307548	97	97	109	14	39	19	103	108	100	0	0	0	same_svim
h1_chr15	3307549	96	97	110	14	38	19	106	108	101	0	0	0	same_svim
h1_chr15	3307550	96	97	109	15	39	19	106	108	99	0	0	0	same_svim
h1_chr15	3307551	96	98	109	15	39	19	107	105	98	0	0	0	same_svim
h1_chr15	3307552	96	99	109	15	38	20	107	105	96	0	0	0	same_svim
h1_chr15	3307553	95	98	109	15	36	20	110	105	96	0	0	0	same_svim
h1_chr15	3307554	94	97	109	15	36	21	112	105	97	0	0	0	same_svim
h1_chr15	3307555	97	97	108	15	36	21	111	104	98	0	0	0	same_svim
h1_chr15	3307556	97	97	107	15	36	21	112	104	98	0	0	0	same_svim
h1_chr15	3307557	97	96	108	15	36	21	111	104	98	0	0	0	same_svim
h1_chr15	3307558	99	96	109	15	36	21	111	104	98	0	0	0	same_svim
h1_chr15	3307559	99	97	110	15	36	21	111	105	98	0	0	0	same_svim
h1_chr15	3307560	98	96	110	15	36	21	110	103	98	0	0	0	same_svim
h1_chr15	3307561	98	93	111	15	36	21	110	103	99	0	0	0	same_svim
h1_chr15	3307562	98	93	111	15	36	21	109	102	101	0	0	0	same_svim
h1_chr15	3307563	98	95	110	15	36	20	108	101	98	0	0	0	same_svim
h1_chr15	3307564	98	98	109	15	35	20	108	100	99	0	0	0	same_svim
h1_chr15	3307565	97	99	111	14	34	20	107	100	99	0	0	0	same_svim
h1_chr15	3307566	97	100	112	15	34	21	108	99	98	0	0	0	same_svim
h1_chr15	3307567	98	100	111	16	34	21	108	100	97	0	0	0	same_svim
h1_chr15	3307568	99	100	112	16	34	21	109	100	97	0	0	0	same_svim
h1_chr15	3307569	99	100	110	16	34	21	108	99	98	0	0	0	same_svim
h1_chr15	3307570	98	100	110	17	34	21	108	99	98	0	0	0	same_svim
h1_chr15	3307571	97	99	110	17	36	21	106	99	98	0	0	0	same_svim
h1_chr15	3307572	96	99	110	18	36	22	106	99	99	0	0	0	same_svim
h1_chr15	3307573	97	97	110	18	36	23	106	99	101	0	0	0	same_svim
h1_chr15	3307574	95	98	111	18	36	23	106	100	102	0	0	0	same_svim
h1_chr15	3307575	94	97	115	19	36	23	106	101	101	0	0	0	same_svim
h1_chr15	3307576	94	98	114	19	36	22	106	101	100	0	0	0	same_svim
h1_chr15	3307577	95	98	114	20	36	23	105	102	100	0	0	0	same_svim
h1_chr15	3307578	96	98	114	20	36	23	104	102	100	0	0	0	same_svim
h1_chr15	3307579	96	96	115	20	36	23	105	103	98	0	0	0	same_svim
h1_chr15	3307580	96	96	115	20	36	24	105	102	98	0	0	0	same_svim
h1_chr15	3307581	95	97	115	20	36	24	105	104	98	0	0	0	same_svim
h1_chr15	3307582	95	95	115	20	37	24	105	102	96	0	0	0	same_svim
h1_chr15	3307583	94	95	116	20	37	24	104	102	97	0	0	0	same_svim
h1_chr15	3307584	92	96	115	20	37	24	104	104	96	0	0	0	same_svim
h1_chr15	3307585	92	96	115	20	36	24	106	104	96	0	0	0	same_svim
h1_chr15	3307586	91	95	115	20	36	24	107	104	97	0	0	0	same_svim
h1_chr15	3307587	89	94	114	20	35	24	108	104	97	0	0	0	same_svim
h1_chr15	3307588	89	93	113	20	35	25	107	103	97	0	0	0	same_svim
h1_chr15	3307589	88	93	112	19	34	25	107	103	98	0	0	0	same_svim
h1_chr15	3307590	88	93	113	20	34	25	106	101	97	0	0	0	same_svim
h1_chr15	3307591	88	93	115	20	34	25	104	101	96	0	0	0	same_svim
h1_chr15	3307592	87	93	117	20	35	25	103	102	95	0	0	0	same_svim
h1_chr15	3307593	88	94	117	20	35	25	103	101	94	0	0	0	same_svim
h1_chr15	3307594	89	93	117	19	35	25	104	101	94	0	0	0	same_svim
h1_chr15	3307595	88	93	116	18	35	25	105	101	94	0	0	0	same_svim
h1_chr15	3307596	86	93	118	18	35	25	104	100	94	0	0	0	same_svim
h1_chr15	3307597	85	92	115	18	35	25	105	101	94	0	0	0	same_svim
h1_chr15	3307598	85	93	116	18	34	25	104	100	93	0	0	0	same_svim
h1_chr15	3307599	85	93	115	18	34	25	103	100	93	0	0	0	same_svim
h1_chr15	3307600	84	94	114	18	35	25	104	100	93	0	0	0	same_svim
h1_chr15	3307601	84	93	115	18	35	25	103	99	93	0	0	0	same_svim
h1_chr15	3307602	85	93	115	18	35	25	103	99	96	0	0	0	same_svim
h1_chr15	3307603	85	93	116	18	35	26	103	99	97	0	0	0	same_svim
h1_chr15	3307604	85	94	116	18	35	26	102	98	98	0	0	0	same_svim
h1_chr15	3307605	85	95	115	17	35	26	101	99	98	0	0	0	same_svim
h1_chr15	3307606	84	96	118	17	35	25	102	99	99	0	0	0	same_svim
h1_chr15	3307607	85	97	119	17	35	25	100	99	99	0	0	0	same_svim
h1_chr15	3307608	85	98	115	16	35	25	98	100	98	0	0	0	same_svim
h1_chr15	3307609	84	100	115	16	35	25	99	100	97	0	0	0	same_svim
h1_chr15	3307610	84	100	116	16	35	25	99	101	96	0	0	0	same_svim
h1_chr15	3307611	84	100	116	16	35	25	100	100	97	0	0	0	same_svim
h1_chr15	3307612	84	99	117	16	35	25	100	99	97	0	0	0	same_svim
h1_chr15	3307613	85	99	118	16	35	25	99	98	98	0	0	0	same_svim
h1_chr15	3307614	85	99	118	16	36	24	97	95	98	0	0	0	same_svim
h1_chr15	3307615	86	103	118	16	35	23	97	95	99	0	0	0	same_svim
h1_chr15	3307616	86	102	116	16	35	22	97	95	99	0	0	0	same_svim
h1_chr15	3307617	85	101	117	16	36	22	97	95	99	0	0	0	same_svim
h1_chr15	3307618	84	100	121	16	36	22	98	95	99	0	0	0	same_svim
h1_chr15	3307619	84	103	121	16	35	21	97	97	98	0	0	0	same_svim
h1_chr15	3307620	84	102	122	16	35	21	96	97	98	0	0	0	same_svim
h1_chr15	3307621	83	101	122	16	34	21	96	97	98	0	0	0	same_svim
h1_chr15	3307622	85	102	122	16	34	21	96	97	98	0	0	0	same_svim
h1_chr15	3307623	84	103	120	16	36	21	96	98	99	0	0	0	same_svim
h1_chr15	3307624	84	103	120	16	37	22	96	98	99	0	0	0	same_svim
h1_chr15	3307625	83	104	119	16	35	22	97	99	99	0	0	0	same_svim
h1_chr15	3307626	82	104	118	16	34	22	99	98	98	0	0	0	same_svim
h1_chr15	3307627	84	102	119	16	34	22	98	98	97	0	0	0	same_svim
h1_chr15	3307628	85	102	118	16	33	22	97	98	98	0	0	0	same_svim
h1_chr15	3307629	86	101	119	16	33	22	97	99	99	0	0	0	same_svim
h1_chr15	3307630	85	101	118	16	33	23	96	99	99	0	0	0	same_svim
h1_chr15	3307631	86	102	119	17	33	23	96	96	99	0	0	0	same_svim
h1_chr15	3307632	85	102	118	17	33	23	95	96	101	0	0	0	same_svim
h1_chr15	3307633	86	103	120	17	33	23	95	95	103	0	0	0	same_svim
h1_chr15	3307634	86	105	120	17	33	23	94	95	102	0	0	0	same_svim
h1_chr15	3307635	87	105	122	17	33	23	92	95	102	0	0	0	same_svim
h1_chr15	3307636	87	107	122	17	33	23	93	95	101	0	0	0	same_svim
h1_chr15	3307637	86	106	122	17	33	23	93	95	101	0	0	0	same_svim
h1_chr15	3307638	84	105	124	17	33	23	93	95	101	0	0	0	same_svim
h1_chr15	3307639	83	105	124	18	33	23	94	95	100	0	0	0	same_svim
h1_chr15	3307640	82	105	123	18	32	23	93	99	100	0	0	0	same_svim
h1_chr15	3307641	82	104	123	18	32	23	93	99	100	0	0	0	same_svim
h1_chr15	3307642	82	104	121	18	32	24	93	101	99	0	0	0	same_svim
h1_chr15	3307643	83	105	122	18	32	24	95	102	98	0	0	0	same_svim
h1_chr15	3307644	82	103	124	18	34	25	94	102	99	0	0	0	same_svim
h1_chr15	3307645	81	101	123	18	34	25	93	102	99	0	0	0	same_svim
h1_chr15	3307646	81	100	124	18	33	25	92	101	97	0	0	0	same_svim
h1_chr15	3307647	81	101	124	18	33	25	92	101	97	0	0	0	same_svim
h1_chr15	3307648	81	102	124	18	33	25	90	101	99	0	0	0	same_svim
h1_chr15	3307649	81	103	121	18	31	25	91	102	99	0	0	0	same_svim
h1_chr15	3307650	81	100	121	18	31	25	92	102	98	0	0	0	same_svim
h1_chr15	3307651	83	100	122	18	31	25	90	102	98	0	0	0	same_svim
h1_chr15	3307652	83	96	121	19	31	25	92	101	98	0	0	0	same_svim
h1_chr15	3307653	84	95	121	19	30	24	90	102	97	0	0	0	same_svim
h1_chr15	3307654	83	95	122	19	29	23	90	102	97	0	0	0	same_svim
h1_chr15	3307655	83	94	122	19	30	23	91	103	98	0	0	0	same_svim
h1_chr15	3307656	83	95	122	19	29	23	91	101	98	0	0	0	same_svim
h1_chr15	3307657	83	94	122	19	29	23	91	99	96	0	0	0	same_svim
h1_chr15	3307658	83	94	122	19	28	23	91	98	98	0	0	0	same_svim
h1_chr15	3307659	81	92	121	19	26	23	91	98	98	0	0	0	same_svim
h1_chr15	3307660	81	93	121	19	26	23	89	98	98	0	0	0	same_svim
h1_chr15	3307661	81	95	122	19	24	22	90	98	97	0	0	0	same_svim
h1_chr15	3307662	81	96	123	19	24	22	91	98	98	0	0	0	same_svim
h1_chr15	3307663	78	95	120	19	24	22	92	95	97	0	0	0	same_svim
h1_chr15	3307664	77	95	120	19	24	22	92	94	97	0	0	0	same_svim
h1_chr15	3307665	77	96	121	19	24	22	93	94	99	0	0	0	same_svim
h1_chr15	3307666	77	94	122	19	24	22	95	95	99	0	0	0	same_svim
h1_chr15	3307667	76	95	122	19	24	22	96	95	99	0	0	0	same_svim
h1_chr15	3307668	79	95	120	19	23	23	96	96	98	0	0	0	same_svim
h1_chr15	3307669	79	96	118	19	24	23	96	96	97	0	0	0	same_svim
h1_chr15	3307670	79	97	117	19	24	23	95	95	95	0	0	0	same_svim
h1_chr15	3307671	79	97	116	19	23	23	96	94	94	0	0	0	same_svim
h1_chr15	3307672	79	98	115	18	23	23	96	94	93	0	0	0	same_svim
h1_chr15	3307673	79	99	116	18	23	23	97	94	93	0	0	0	same_svim
h1_chr15	3307674	79	100	117	17	23	23	98	91	94	0	0	0	same_svim
h1_chr15	3307675	79	100	118	17	23	23	98	92	94	0	0	0	same_svim
h1_chr15	3307676	79	99	116	16	22	23	97	92	92	0	0	0	same_svim
h1_chr15	3307677	78	99	116	15	22	23	96	92	92	0	0	0	same_svim
h1_chr15	3307678	76	97	116	15	22	23	96	92	92	0	0	0	same_svim
h1_chr15	3307679	78	97	117	15	22	23	96	91	91	0	0	0	same_svim
h1_chr15	3307680	77	97	118	14	22	23	95	92	90	0	0	0	same_svim
h1_chr15	3307681	78	97	118	14	23	24	95	92	89	0	0	0	same_svim
h1_chr15	3307682	79	96	118	14	23	23	95	92	89	0	0	0	same_svim
h1_chr15	3307683	78	48	68	1	14	3	93	91	88	0	0	0
h1_chr15	3307684	77	94	116	13	21	22	92	90	89	0	0	0	same_svim
h1_chr15	3307685	78	95	116	13	21	22	92	89	89	0	0	0	same_svim
h1_chr15	3307686	79	93	116	13	21	20	92	90	88	0	0	0	same_svim
[truncated: 99,095 more rows]
[truncated: 1 more columns]

## Sheet: Caption
Supplementary Data 2. Summary of W-hemizygous sites on the W haplotype of Salix herbacea. Position (Pos), in S. herbacea are given together with the depth of the site in other 12 individuals of S. viminalis, S. pupurea and S. suchowensis. Summaries of whether the same W-hemizygous pattern (present in all females and absent in all males) is shared in S. viminalis or all of three species are listed…
