# Supplementary material for: Dynamic evolution of a sex-linked region
Source: Research Square preprint supplement (doi:10.21203/rs.3.rs-5980036/v1), 2025-02-10
Supplement: Supplementary file 3 [file db9a517ecaa68b2ac2a97c42.xlsx]

## Sheet: W-specific polymorphisms
NO	Chr	Pos	Ref.Sher	Alt.Sher	Variant.effect	Putative.impact	GeneID	Sher.F	Sher.M	Svim.F03.GT	Svim.F04.GT	Svim.F05.GT	Spurpurea_F94006.GT	Ssuchowensis_FP294.GT	Ssuchowensis_FP295.GT	Svim.M01.GT	Svim.M06.GT	Svim.M07.GT	Spurpurea_M94001.GT	Spurpurea_MFishCreek.GT	Ssuchowensis_MP63.GT	svim.check	spur.check	ssuc.check	all.check
1	h1_chr07	782350	A	G	intron_variant	MODIFIER	h1_chr07+_g11950	A|G	G|G	G|G	G|G	G|G	NA	NA	NA	G|G	G|G	G|G	NA	NA	NA	NA	NA	NA	NA
2	h1_chr07	793498	AGGC	A	disruptive_inframe_deletion	MODERATE	h1_chr07-_g11951	AGGC|A	A|A	AGGC|AGGC	AGGC|A	AGGC|A	A|A	A|A	A|A	A|A	AGGC|AGGC	AGGC|AGGC	A|A	A|A	A|A	NA	NA	NA	NA
3	h1_chr15	3269660	T	TA	upstream_gene_variant	MODIFIER	h1_chr15-_g23451	T|TA	TA|TA	TA|TA	TA|TA	TA|TA	TA|TA	TA|TA	TA|TA	TA|TA	TA|TA	TA|TA	TA|TA	TA|TA	TA|TA	NA	NA	NA	NA
4	h1_chr15	3269668	T	C	upstream_gene_variant	MODIFIER	h1_chr15-_g23451	T|C	C|C	C|C	C|C	C|C	C|C	C|C	C|C	C|C	C|C	C|C	C|C	C|C	C|C	NA	NA	NA	NA
5	h1_chr15	3269696	G	T	upstream_gene_variant	MODIFIER	h1_chr15-_g23451	G|T	T|T	T|T	T|T	T|T	T|T	T|T	T|T	T|T	T|T	T|T	T|T	T|T	T|T	NA	NA	NA	NA
6	h1_chr15	3269768	G	A	upstream_gene_variant	MODIFIER	h1_chr15-_g23451	G|A	A|A	A|A	G|A	A|A	NA	A|A	A|A	A|A	A|A	A|A	NA	NA	A|A	NA	NA	NA	NA
7	h1_chr15	3269896	A	G	upstream_gene_variant	MODIFIER	h1_chr15-_g23451	A|G	G|G	G|G	A|G	G|G	G|G	G|G	G|G	G|G	G|G	G|G	G|G	G|G	G|G	NA	NA	NA	NA
8	h1_chr15	3271394	G	A	upstream_gene_variant	MODIFIER	h1_chr15-_g23451	G|A	A|A	A|A	A|A	A|A	A|A	A|A	A|A	A|A	A|A	A|A	A|A	A|A	A|A	NA	NA	NA	NA
9	h1_chr15	3271465	A	T	upstream_gene_variant	MODIFIER	h1_chr15-_g23451	A|T	T|T	T|T	T|T	T|T	A|A	NA	NA	T|T	T|T	T|T	A|A	A|A	NA	NA	NA	NA	NA
10	h1_chr15	3272057	C	T	upstream_gene_variant	MODIFIER	h1_chr15-_g23451	C|T	T|T	T|T	T|T	T|T	T|T	T|T	T|T	T|T	T|T	T|T	T|T	T|T	T|T	NA	NA	NA	NA
11	h1_chr15	3272326	GT	G	upstream_gene_variant	MODIFIER	h1_chr15-_g23451	GT|G	G|G	G|G	G|G	G|G	G|G	G|G	G|G	G|G	G|G	G|G	G|G	G|G	G|G	NA	NA	NA	NA
12	h1_chr15	3274194	T	G	upstream_gene_variant	MODIFIER	h1_chr15-_g23451	T|G	G|G	G|G	G|G	G|G	G|G	G|G	G|G	G|G	G|G	G|G	G|G	G|G	G|G	NA	NA	NA	NA
13	h1_chr15	3280590	G	C	synonymous_variant	LOW	h1_chr15+_g23452	G|C	C|C	C|C	C|C	C|C	C|C	C|C	C|C	C|C	C|C	C|C	C|C	C|C	C|C	NA	NA	NA	NA
14	h1_chr15	3280805	G	A	downstream_gene_variant	MODIFIER	h1_chr15+_g23452	G|A	A|A	NA	NA	NA	A|A	A|A	A|A	NA	NA	NA	A|A	A|A	A|A	NA	NA	NA	NA
15	h1_chr15	3280892	A	G	downstream_gene_variant	MODIFIER	h1_chr15+_g23452	A|G	G|G	G|G	G|G	G|G	G|G	G|G	G|G	G|G	G|G	G|G	G|G	G|G	G|G	NA	NA	NA	NA
16	h1_chr15	3281105	C	A	downstream_gene_variant	MODIFIER	h1_chr15+_g23452	C|A	A|A	A|A	A|A	A|A	A|A	A|A	A|A	A|A	A|A	A|A	A|A	A|A	A|A	NA	NA	NA	NA
17	h1_chr15	3281125	G	A	downstream_gene_variant	MODIFIER	h1_chr15+_g23452	G|A	A|A	A|A	A|A	A|A	A|A	A|A	A|A	A|A	A|A	A|A	A|A	A|A	A|A	NA	NA	NA	NA
18	h1_chr15	3281626	A	C	downstream_gene_variant	MODIFIER	h1_chr15+_g23452	A|C	C|C	C|C	C|C	C|C	C|C	C|C	C|C	C|C	C|C	C|C	.|.	C|C	C|C	NA	NA	NA	NA
19	h1_chr15	3281736	G	A	downstream_gene_variant	MODIFIER	h1_chr15+_g23452	G|A	A|A	A|A	A|A	A|A	A|A	A|A	A|A	A|A	A|A	A|A	A|A	A|A	A|A	NA	NA	NA	NA
20	h1_chr15	3281976	G	A	downstream_gene_variant	MODIFIER	h1_chr15+_g23452	G|A	A|A	A|A	A|A	A|A	A|A	A|A	A|A	A|A	A|A	A|A	A|A	A|A	A|A	NA	NA	NA	NA
21	h1_chr15	3282015	C	T	downstream_gene_variant	MODIFIER	h1_chr15+_g23452	C|T	T|T	T|T	T|T	T|T	T|T	T|T	T|T	T|T	T|T	T|T	T|T	T|T	T|T	NA	NA	NA	NA
22	h1_chr15	3282071	A	G	downstream_gene_variant	MODIFIER	h1_chr15+_g23452	A|G	G|G	NA	NA	NA	G|G	G|G	G|G	NA	NA	NA	G|G	G|G	G|G	NA	NA	NA	NA
23	h1_chr15	3282363	C	T	downstream_gene_variant	MODIFIER	h1_chr15+_g23452	C|T	T|T	T|T	T|T	T|T	T|T	T|T	T|T	T|T	T|T	T|T	T|T	T|T	T|T	NA	NA	NA	NA
24	h1_chr15	3282441	A	G	downstream_gene_variant	MODIFIER	h1_chr15+_g23452	A|G	G|G	G|G	G|G	G|G	G|G	G|G	G|G	G|G	G|G	G|G	G|G	G|G	G|G	NA	NA	NA	NA
25	h1_chr15	3283129	G	A	downstream_gene_variant	MODIFIER	h1_chr15+_g23452	G|A	A|A	A|A	A|A	A|A	A|A	A|A	A|A	A|A	A|A	A|A	A|A	A|A	A|A	NA	NA	NA	NA
26	h1_chr15	3283218	C	T	downstream_gene_variant	MODIFIER	h1_chr15+_g23452	C|T	T|T	T|T	T|T	T|T	T|T	T|T	T|T	T|T	T|T	T|T	T|T	T|T	T|T	NA	NA	NA	NA
27	h1_chr15	3283264	G	A	downstream_gene_variant	MODIFIER	h1_chr15+_g23452	G|A	A|A	NA	NA	NA	NA	NA	NA	NA	NA	NA	NA	NA	NA	NA	NA	NA	NA
28	h1_chr15	3283559	A	T	downstream_gene_variant	MODIFIER	h1_chr15+_g23452	A|T	T|T	T|T	T|T	T|T	T|T	T|T	T|T	T|T	T|T	T|T	T|T	T|T	T|T	NA	NA	NA	NA
29	h1_chr15	3283734	A	G	downstream_gene_variant	MODIFIER	h1_chr15+_g23452	A|G	G|G	G|G	G|G	G|G	G|G	G|G	G|G	G|G	G|G	G|G	G|G	G|G	G|G	NA	NA	NA	NA
30	h1_chr15	3283778	T	G	downstream_gene_variant	MODIFIER	h1_chr15+_g23452	T|G	G|G	G|G	G|G	G|G	G|G	G|G	G|G	G|G	G|G	G|G	G|G	G|G	G|G	NA	NA	NA	NA
31	h1_chr15	3299417	T	G	synonymous_variant	LOW	h1_chr15-_g23454	T|G	G|G	G|G	G|G	G|G	G|G	G|G	G|G	G|G	G|G	G|G	G|G	G|G	G|G	NA	NA	NA	NA
32	h1_chr15	3299893	C	T	intron_variant	MODIFIER	h1_chr15-_g23454	C|T	T|T	C|T	C|T	C|T	T|T	T|T	T|T	C|C	C|C	C|C	T|T	T|T	T|T	same	NA	NA	NA
33	h1_chr15	3301286	G	A	synonymous_variant	LOW	h1_chr15-_g23454	G|A	A|A	A|A	G|A	G|A	A|A	G|A	G|A	A|A	A|A	A|A	A|A	A|A	A|A	NA	NA	same	NA
34	h1_chr15	3303329	CA	C	upstream_gene_variant	MODIFIER	h1_chr15-_g23454	CA|C	C|C	CA|CA	CA|C	CA|C	NA	NA	NA	C|C	C|C	C|C	NA	NA	NA	NA	NA	NA	NA
35	h1_chr15	3303387	A	G	upstream_gene_variant	MODIFIER	h1_chr15-_g23454	A|G	G|G	A|A	A|G	A|G	NA	A|G	A|G	G|G	G|G	G|G	NA	NA	G|G	NA	NA	same	NA
36	h1_chr15	3303492	T	C	upstream_gene_variant	MODIFIER	h1_chr15-_g23454	T|C	C|C	T|C	T|C	T|C	C|C	T|C	T|C	C|C	C|C	C|C	.|.	.|.	C|C	same	NA	same	NA
37	h1_chr15	3303862	A	G	upstream_gene_variant	MODIFIER	h1_chr15-_g23454	A|G	G|G	A|G	A|G	A|G	G|G	A|G	A|G	G|G	G|G	G|G	G|G	G|G	G|G	same	NA	same	NA
38	h1_chr15	3313884	CAAA	C	intergenic_region	MODIFIER	h1_chr15-_g23454-h1_chr15+_g23455	CAAA|C	C|C	CAAA|C	CAAA|C	CAAA|C	NA	C|T	C|T	C|C	C|C	C|C	NA	NA	T|T	same	NA	same	NA
39	h1_chr15	3313898	G	A	intergenic_region	MODIFIER	h1_chr15-_g23454-h1_chr15+_g23455	G|A	A|A	G|A	G|A	G|A	NA	NA	NA	A|A	A|A	A|A	NA	NA	NA	same	NA	NA	NA
40	h1_chr15	3313916	G	T	intergenic_region	MODIFIER	h1_chr15-_g23454-h1_chr15+_g23455	G|T	T|T	G|T	G|T	G|T	NA	NA	NA	T|T	T|T	T|T	NA	NA	NA	same	NA	NA	NA
41	h1_chr15	3314278	G	A	intergenic_region	MODIFIER	h1_chr15-_g23454-h1_chr15+_g23455	G|A	A|A	G|A	G|A	G|A	NA	NA	NA	A|A	A|A	A|A	NA	NA	NA	same	same	NA	NA
42	h1_chr15	3314290	G	A	intergenic_region	MODIFIER	h1_chr15-_g23454-h1_chr15+_g23455	G|A	A|A	G|A	G|A	G|A	G|A	NA	NA	A|A	A|A	A|A	G|G	G|G	NA	same	same	NA	NA
43	h1_chr15	3314294	C	T	intergenic_region	MODIFIER	h1_chr15-_g23454-h1_chr15+_g23455	C|T	T|T	C|T	C|T	C|T	C|T	NA	NA	T|T	T|T	T|T	C|C	C|C	NA	same	same	NA	NA
44	h1_chr15	3314324	T	C	intergenic_region	MODIFIER	h1_chr15-_g23454-h1_chr15+_g23455	T|C	C|C	T|C	T|C	T|C	NA	NA	NA	C|C	C|C	C|C	NA	NA	NA	same	NA	NA	NA
45	h1_chr15	3314337	G	A	intergenic_region	MODIFIER	h1_chr15-_g23454-h1_chr15+_g23455	G|A	A|A	G|A	G|A	G|A	NA	NA	NA	A|A	A|A	A|A	NA	NA	NA	same	NA	NA	NA
46	h1_chr15	3314403	C	T	intergenic_region	MODIFIER	h1_chr15-_g23454-h1_chr15+_g23455	C|T	T|T	NA	NA	NA	C|T	NA	NA	NA	NA	NA	T|T	T|T	NA	NA	same	NA	NA
47	h1_chr15	3314457	G	A	intergenic_region	MODIFIER	h1_chr15-_g23454-h1_chr15+_g23455	G|A	A|A	G|G	G|G	G|G	NA	A|A	A|A	A|A	A|A	A|A	NA	NA	A|A	same	NA	NA	NA
48	h1_chr15	3314460	C	T	intergenic_region	MODIFIER	h1_chr15-_g23454-h1_chr15+_g23455	C|T	T|T	C|C	C|C	C|C	NA	NA	NA	T|T	T|T	T|T	NA	NA	NA	same	NA	NA	NA
49	h1_chr15	3314571	TAA	T	intergenic_region	MODIFIER	h1_chr15-_g23454-h1_chr15+_g23455	TAA|T	T|T	T|T	TAA|T	T|T	TAA|T	NA	NA	T|T	T|T	T|T	T|T	T|T	NA	NA	same	NA	NA
50	h1_chr15	3314578	A	T	intergenic_region	MODIFIER	h1_chr15-_g23454-h1_chr15+_g23455	A|T	T|T	A|T	A|T	A|T	A|T	NA	NA	T|T	T|T	T|T	T|T	T|T	NA	same	same	NA	NA
51	h1_chr15	3314589	C	T	intergenic_region	MODIFIER	h1_chr15-_g23454-h1_chr15+_g23455	C|T	T|T	C|T	C|T	C|T	NA	NA	NA	T|T	T|T	T|T	NA	NA	NA	same	NA	NA	NA
52	h1_chr15	3314599	C	T	intergenic_region	MODIFIER	h1_chr15-_g23454-h1_chr15+_g23455	C|T	T|T	NA	NA	NA	NA	NA	NA	NA	NA	NA	NA	NA	NA	NA	NA	NA	NA
53	h1_chr15	3314762	C	A	intergenic_region	MODIFIER	h1_chr15-_g23454-h1_chr15+_g23455	C|A	A|A	C|A	C|A	A|A	NA	NA	NA	A|A	A|A	A|A	NA	NA	NA	NA	NA	NA	NA
54	h1_chr15	3314779	C	G	intergenic_region	MODIFIER	h1_chr15-_g23454-h1_chr15+_g23455	C|G	G|G	C|G	C|G	G|G	NA	NA	NA	G|G	G|G	G|G	NA	NA	NA	NA	NA	NA	NA
55	h1_chr15	3314812	G	A	intergenic_region	MODIFIER	h1_chr15-_g23454-h1_chr15+_g23455	G|A	A|A	G|A	G|A	G|A	NA	NA	NA	A|A	A|A	A|A	NA	NA	NA	same	NA	NA	NA
56	h1_chr15	3314837	A	G	intergenic_region	MODIFIER	h1_chr15-_g23454-h1_chr15+_g23455	A|G	G|G	A|G	A|G	A|G	G|G	A|G	A|G	G|G	G|G	G|G	G|G	G|G	G|G	same	NA	same	NA
57	h1_chr15	3314850	AC	A	intergenic_region	MODIFIER	h1_chr15-_g23454-h1_chr15+_g23455	AC|A	A|A	AC|A	AC|A	AC|A	A|T	NA	NA	A|A	A|A	A|A	A|A	A|A	NA	same	same	NA	NA
58	h1_chr15	3314914	G	A	intergenic_region	MODIFIER	h1_chr15-_g23454-h1_chr15+_g23455	G|A	A|A	G|A	G|A	G|A	NA	NA	NA	A|A	A|A	A|A	NA	NA	NA	same	NA	NA	NA
59	h1_chr15	3314918	A	G	intergenic_region	MODIFIER	h1_chr15-_g23454-h1_chr15+_g23455	A|G	G|G	A|G	A|G	A|G	NA	NA	NA	G|G	G|G	G|G	NA	NA	NA	same	NA	NA	NA
60	h1_chr15	3314972	T	C	intergenic_region	MODIFIER	h1_chr15-_g23454-h1_chr15+_g23455	T|C	C|C	T|C	T|C	T|C	NA	NA	NA	C|C	C|C	C|C	NA	NA	NA	same	NA	NA	NA
61	h1_chr15	3314973	G	A	intergenic_region	MODIFIER	h1_chr15-_g23454-h1_chr15+_g23455	G|A	A|A	G|A	G|A	G|A	NA	NA	NA	A|A	A|A	A|A	NA	NA	NA	same	NA	NA	NA
62	h1_chr15	3315012	C	G	intergenic_region	MODIFIER	h1_chr15-_g23454-h1_chr15+_g23455	C|G	G|G	C|G	C|G	C|G	C|G	NA	NA	G|G	G|G	G|G	G|G	G|G	NA	same	same	NA	NA
63	h1_chr15	3315501	T	G	intergenic_region	MODIFIER	h1_chr15-_g23454-h1_chr15+_g23455	T|G	G|G	T|G	T|G	T|G	NA	NA	NA	G|G	G|G	G|G	NA	NA	NA	same	NA	NA	NA
64	h1_chr15	3315534	T	A	intergenic_region	MODIFIER	h1_chr15-_g23454-h1_chr15+_g23455	T|A	A|A	T|A	T|A	T|A	NA	NA	NA	A|A	A|A	A|A	NA	NA	NA	same	NA	NA	NA
65	h1_chr15	3315770	G	A	intergenic_region	MODIFIER	h1_chr15-_g23454-h1_chr15+_g23455	G|A	A|A	G|A	G|A	G|A	NA	NA	NA	A|A	A|A	A|A	NA	NA	NA	same	NA	NA	NA
66	h1_chr15	3315780	G	A	intergenic_region	MODIFIER	h1_chr15-_g23454-h1_chr15+_g23455	G|A	A|A	G|A	G|A	G|A	NA	NA	NA	A|A	A|A	A|A	NA	NA	NA	same	NA	NA	NA
67	h1_chr15	3316139	C	T	intergenic_region	MODIFIER	h1_chr15-_g23454-h1_chr15+_g23455	C|T	T|T	C|T	C|T	C|T	NA	NA	NA	T|T	T|T	T|T	NA	NA	NA	same	NA	NA	NA
68	h1_chr15	3316213	C	T	intergenic_region	MODIFIER	h1_chr15-_g23454-h1_chr15+_g23455	C|T	T|T	C|T	C|T	C|T	NA	NA	NA	T|T	T|T	T|T	NA	NA	NA	same	NA	same	NA
69	h1_chr15	3316243	G	A	intergenic_region	MODIFIER	h1_chr15-_g23454-h1_chr15+_g23455	G|A	A|A	G|A	G|A	G|A	NA	G|A	G|A	A|A	A|A	A|A	NA	NA	A|A	same	NA	same	NA
70	h1_chr15	3317607	T	A	intergenic_region	MODIFIER	h1_chr15-_g23454-h1_chr15+_g23455	T|A	A|A	T|A	T|A	T|A	NA	NA	NA	A|A	A|A	A|A	NA	NA	NA	same	NA	same	NA
71	h1_chr15	3317838	T	C	intergenic_region	MODIFIER	h1_chr15-_g23454-h1_chr15+_g23455	T|C	C|C	T|C	T|C	T|T	NA	T|C	T|C	T|C	T|C	T|C	NA	NA	C|C	NA	NA	same	NA
72	h1_chr15	3319219	A	G	intergenic_region	MODIFIER	h1_chr15-_g23454-h1_chr15+_g23455	A|G	G|G	A|G	A|G	A|G	NA	A|G	A|G	A|G	A|G	A|G	NA	NA	A|A	NA	NA	same	NA
73	h1_chr15	3319237	A	G	intergenic_region	MODIFIER	h1_chr15-_g23454-h1_chr15+_g23455	A|G	G|G	A|G	A|G	A|G	NA	A|G	A|G	A|G	A|G	A|G	NA	NA	A|A	NA	NA	same	NA
74	h1_chr15	5460319	T	G	upstream_gene_variant	MODIFIER	h1_chr15+_g23571	T|G	G|G	T|G	T|G	T|G	T|G	G|G	G|G	G|G	G|G	G|G	G|G	G|G	G|G	same	same	NA	NA
75	h1_chr15	5460619	C	A	upstream_gene_variant	MODIFIER	h1_chr15+_g23571	C|A	A|A	C|A	C|A	C|A	C|A	A|A	A|A	A|A	A|A	A|A	A|A	A|A	A|A	same	same	NA	NA
76	h1_chr15	5460669	G	T	upstream_gene_variant	MODIFIER	h1_chr15+_g23571	G|T	T|T	G|T	G|T	G|T	G|T	T|T	T|T	T|T	T|T	T|T	T|T	T|T	T|T	same	same	NA	NA
77	h1_chr15	5460690	T	C	upstream_gene_variant	MODIFIER	h1_chr15+_g23571	T|C	C|C	T|C	T|C	T|C	T|C	C|C	C|C	C|C	C|C	C|C	C|C	C|C	C|C	same	same	NA	NA
78	h1_chr15	5461088	C	T	upstream_gene_variant	MODIFIER	h1_chr15+_g23571	C|T	T|T	C|T	C|T	C|T	T|T	T|T	T|T	T|T	T|T	T|T	T|T	T|T	T|T	same	NA	NA	NA
79	h1_chr15	5461187	C	T	upstream_gene_variant	MODIFIER	h1_chr15+_g23571	C|T	T|T	C|T	C|T	C|T	T|T	T|T	T|T	T|T	T|T	T|T	T|T	T|T	T|T	same	NA	NA	NA
80	h1_chr15	5461207	G	A	upstream_gene_variant	MODIFIER	h1_chr15+_g23571	G|A	A|A	G|A	G|A	G|A	A|A	A|A	A|A	A|A	A|A	A|A	A|A	A|A	A|A	same	NA	NA	NA
81	h1_chr15	5542448	A	G	synonymous_variant	LOW	h1_chr15-_g23580	A|G	G|G	A|A	A|G	A|G	G|G	A|G	A|G	G|G	G|G	G|G	G|G	G|G	A|A	NA	NA	same	NA
82	h1_chr15	5586357	C	T	intergenic_region	MODIFIER	h1_chr15+_g23581-h1_chr15-_g23582	C|T	T|T	C|T	C|T	C|T	C|T	NA	NA	T|T	T|T	C|C	C|T	C|C	NA	NA	NA	NA	NA
83	h1_chr15	5588914	C	T	intergenic_region	MODIFIER	h1_chr15+_g23581-h1_chr15-_g23582	C|T	T|T	NA	NA	NA	NA	G|G	G|G	NA	NA	NA	NA	NA	G|G	NA	NA	NA	NA
84	h1_chr15	5588941	C	T	intergenic_region	MODIFIER	h1_chr15+_g23581-h1_chr15-_g23582	C|T	T|T	NA	NA	NA	NA	NA	NA	NA	NA	NA	NA	NA	NA	NA	NA	NA	NA
85	h1_chr15	5588990	A	T	intergenic_region	MODIFIER	h1_chr15+_g23581-h1_chr15-_g23582	A|T	T|T	NA	NA	NA	NA	NA	NA	NA	NA	NA	NA	NA	NA	NA	NA	NA	NA
86	h1_chr15	5588991	A	G	intergenic_region	MODIFIER	h1_chr15+_g23581-h1_chr15-_g23582	A|G	G|G	NA	NA	NA	NA	NA	NA	NA	NA	NA	NA	NA	NA	NA	NA	NA	NA
87	h1_chr15	5589026	G	A	intergenic_region	MODIFIER	h1_chr15+_g23581-h1_chr15-_g23582	G|A	A|A	NA	NA	NA	NA	NA	NA	NA	NA	NA	NA	NA	NA	NA	NA	NA	NA
88	h1_chr15	5589040	G	A	intergenic_region	MODIFIER	h1_chr15+_g23581-h1_chr15-_g23582	G|A	A|A	NA	NA	NA	NA	NA	NA	NA	NA	NA	NA	NA	NA	NA	NA	NA	NA
89	h1_chr15	5589052	T	C	intergenic_region	MODIFIER	h1_chr15+_g23581-h1_chr15-_g23582	T|C	C|C	NA	NA	NA	NA	NA	NA	NA	NA	NA	NA	NA	NA	NA	NA	NA	NA
90	h1_chr15	5589072	T	C	intergenic_region	MODIFIER	h1_chr15+_g23581-h1_chr15-_g23582	T|C	C|C	T|C	T|C	T|T	NA	NA	NA	T|T	T|T	T|T	NA	NA	NA	NA	NA	NA	NA
91	h1_chr15	5589077	AT	A	intergenic_region	MODIFIER	h1_chr15+_g23581-h1_chr15-_g23582	AT|A	A|A	NA	NA	NA	NA	NA	NA	NA	NA	NA	NA	NA	NA	NA	NA	NA	NA
92	h1_chr15	5589082	T	G	intergenic_region	MODIFIER	h1_chr15+_g23581-h1_chr15-_g23582	T|G	G|G	NA	NA	NA	NA	NA	NA	NA	NA	NA	NA	NA	NA	NA	NA	NA	NA
93	h1_chr15	5589083	T	C	intergenic_region	MODIFIER	h1_chr15+_g23581-h1_chr15-_g23582	T|C	C|C	NA	NA	NA	NA	NA	NA	NA	NA	NA	NA	NA	NA	NA	NA	NA	NA
94	h1_chr15	5589086	TTGG	T	intergenic_region	MODIFIER	h1_chr15+_g23581-h1_chr15-_g23582	TTGG|T	T|T	NA	NA	NA	NA	NA	NA	NA	NA	NA	NA	NA	NA	NA	NA	NA	NA
95	h1_chr15	5589091	C	A	intergenic_region	MODIFIER	h1_chr15+_g23581-h1_chr15-_g23582	C|A	A|A	NA	NA	NA	NA	NA	NA	NA	NA	NA	NA	NA	NA	NA	NA	NA	NA
96	h1_chr15	5589092	TGG	T	intergenic_region	MODIFIER	h1_chr15+_g23581-h1_chr15-_g23582	TGG|T	T|T	T|A	T|A	A|A	NA	NA	NA	A|A	A|A	T|T	NA	NA	NA	NA	NA	NA	NA
97	h1_chr15	5589097	A	T	intergenic_region	MODIFIER	h1_chr15+_g23581-h1_chr15-_g23582	A|T	T|T	NA	NA	NA	NA	NA	NA	NA	NA	NA	NA	NA	NA	NA	NA	NA	NA
98	h1_chr15	5589146	T	C	intergenic_region	MODIFIER	h1_chr15+_g23581-h1_chr15-_g23582	T|C	C|C	NA	NA	NA	NA	NA	NA	NA	NA	NA	NA	NA	NA	NA	NA	NA	NA
99	h1_chr15	5589147	C	A	intergenic_region	MODIFIER	h1_chr15+_g23581-h1_chr15-_g23582	C|A	A|A	NA	NA	NA	NA	NA	NA	NA	NA	NA	NA	NA	NA	NA	NA	NA	NA
100	h1_chr15	5589153	C	T	intergenic_region	MODIFIER	h1_chr15+_g23581-h1_chr15-_g23582	C|T	T|T	NA	NA	NA	NA	NA	NA	NA	NA	NA	NA	NA	NA	NA	NA	NA	NA
101	h1_chr15	5589219	C	T	intergenic_region	MODIFIER	h1_chr15+_g23581-h1_chr15-_g23582	C|T	T|T	NA	NA	NA	NA	NA	NA	NA	NA	NA	NA	NA	NA	NA	NA	NA	NA
102	h1_chr15	5589236	TCA	T	intergenic_region	MODIFIER	h1_chr15+_g23581-h1_chr15-_g23582	TCA|T	T|T	NA	NA	NA	NA	NA	NA	NA	NA	NA	NA	NA	NA	NA	NA	NA	NA
103	h1_chr15	5589250	A	T	intergenic_region	MODIFIER	h1_chr15+_g23581-h1_chr15-_g23582	A|T	T|T	NA	NA	NA	NA	NA	NA	NA	NA	NA	NA	NA	NA	NA	NA	NA	NA
104	h1_chr15	5589309	T	G	intergenic_region	MODIFIER	h1_chr15+_g23581-h1_chr15-_g23582	T|G	G|G	NA	NA	NA	NA	NA	NA	NA	NA	NA	NA	NA	NA	NA	NA	NA	NA
105	h1_chr15	5589352	A	G	intergenic_region	MODIFIER	h1_chr15+_g23581-h1_chr15-_g23582	A|G	G|G	NA	NA	NA	G|G	NA	NA	NA	NA	NA	G|G	G|G	NA	same	NA	NA	NA
106	h1_chr15	5589413	G	A	intergenic_region	MODIFIER	h1_chr15+_g23581-h1_chr15-_g23582	G|A	A|A	NA	NA	NA	NA	NA	NA	NA	NA	NA	NA	NA	NA	NA	NA	NA	NA
107	h1_chr15	5589508	A	T	intergenic_region	MODIFIER	h1_chr15+_g23581-h1_chr15-_g23582	A|T	T|T	NA	NA	NA	NA	NA	NA	NA	NA	NA	NA	NA	NA	NA	NA	NA	NA
108	h1_chr15	5589538	T	C	intergenic_region	MODIFIER	h1_chr15+_g23581-h1_chr15-_g23582	T|C	C|C	NA	NA	NA	NA	NA	NA	NA	NA	NA	NA	NA	NA	NA	NA	NA	NA
109	h1_chr15	5590251	A	ACG	intergenic_region	MODIFIER	h1_chr15+_g23581-h1_chr15-_g23582	A|ACG	ACG|ACG	NA	NA	NA	NA	NA	NA	NA	NA	NA	NA	NA	NA	NA	NA	NA	NA
110	h1_chr15	5590252	T	TAC	intergenic_region	MODIFIER	h1_chr15+_g23581-h1_chr15-_g23582	T|TAC	TAC|TAC	NA	NA	NA	NA	NA	NA	NA	NA	NA	NA	NA	NA	NA	NA	NA	NA
111	h1_chr15	5590261	T	G	intergenic_region	MODIFIER	h1_chr15+_g23581-h1_chr15-_g23582	T|G	G|G	NA	NA	NA	NA	NA	NA	NA	NA	NA	NA	NA	NA	NA	NA	NA	NA
112	h1_chr15	5590294	C	T	intergenic_region	MODIFIER	h1_chr15+_g23581-h1_chr15-_g23582	C|T	T|T	NA	NA	NA	NA	NA	NA	NA	NA	NA	NA	NA	NA	NA	NA	NA	NA
113	h1_chr15	5590297	A	G	intergenic_region	MODIFIER	h1_chr15+_g23581-h1_chr15-_g23582	A|G	G|G	NA	NA	NA	NA	NA	NA	NA	NA	NA	NA	NA	NA	NA	NA	NA	NA
114	h1_chr15	5590303	T	C	intergenic_region	MODIFIER	h1_chr15+_g23581-h1_chr15-_g23582	T|C	C|C	NA	NA	NA	NA	NA	NA	NA	NA	NA	NA	NA	NA	NA	NA	NA	NA
115	h1_chr15	5590320	A	T	intergenic_region	MODIFIER	h1_chr15+_g23581-h1_chr15-_g23582	A|T	T|T	NA	NA	NA	NA	NA	NA	NA	NA	NA	NA	NA	NA	NA	NA	NA	NA
116	h1_chr15	5590339	T	C	intergenic_region	MODIFIER	h1_chr15+_g23581-h1_chr15-_g23582	T|C	C|C	NA	NA	NA	T|C	T|C	T|T	NA	NA	NA	C|C	C|C	T|T	NA	same	NA	NA
117	h1_chr15	5590684	CAGCAG	C	intergenic_region	MODIFIER	h1_chr15+_g23581-h1_chr15-_g23582	CAGCAG|C	C|C	NA	NA	NA	NA	NA	NA	NA	NA	NA	NA	NA	NA	NA	NA	NA	NA
118	h1_chr15	5590730	T	C	intergenic_region	MODIFIER	h1_chr15+_g23581-h1_chr15-_g23582	T|C	C|C	NA	NA	NA	NA	NA	NA	NA	NA	NA	NA	NA	NA	NA	NA	NA	NA
119	h1_chr15	5590732	GC	G	intergenic_region	MODIFIER	h1_chr15+_g23581-h1_chr15-_g23582	GC|G	G|G	NA	NA	NA	NA	NA	NA	NA	NA	NA	NA	NA	NA	NA	NA	NA	NA
120	h1_chr15	5590740	T	TTC	intergenic_region	MODIFIER	h1_chr15+_g23581-h1_chr15-_g23582	T|TTC	TTC|TTC	NA	NA	NA	NA	NA	NA	NA	NA	NA	NA	NA	NA	NA	NA	NA	NA
121	h1_chr15	5590801	C	T	intergenic_region	MODIFIER	h1_chr15+_g23581-h1_chr15-_g23582	C|T	T|T	NA	NA	NA	NA	NA	NA	NA	NA	NA	NA	NA	NA	NA	NA	NA	NA
122	h1_chr15	5590847	G	C	intergenic_region	MODIFIER	h1_chr15+_g23581-h1_chr15-_g23582	G|C	C|C	NA	NA	NA	NA	NA	NA	NA	NA	NA	NA	NA	NA	NA	NA	NA	NA
123	h1_chr15	5590855	T	C	intergenic_region	MODIFIER	h1_chr15+_g23581-h1_chr15-_g23582	T|C	C|C	NA	NA	NA	NA	NA	NA	NA	NA	NA	NA	NA	NA	NA	NA	NA	NA
124	h1_chr15	5590874	T	C	intergenic_region	MODIFIER	h1_chr15+_g23581-h1_chr15-_g23582	T|C	C|C	NA	NA	NA	NA	NA	NA	NA	NA	NA	NA	NA	NA	NA	NA	NA	NA
125	h1_chr15	5593090	G	A	intergenic_region	MODIFIER	h1_chr15+_g23581-h1_chr15-_g23582	G|A	A|A	NA	NA	NA	NA	NA	NA	NA	NA	NA	NA	NA	NA	NA	NA	NA	NA
126	h1_chr15	5593129	T	A	intergenic_region	MODIFIER	h1_chr15+_g23581-h1_chr15-_g23582	T|A	A|A	NA	NA	NA	NA	NA	NA	NA	NA	NA	NA	NA	NA	NA	NA	NA	NA
127	h1_chr15	5593131	T	C	intergenic_region	MODIFIER	h1_chr15+_g23581-h1_chr15-_g23582	T|C	C|C	NA	NA	NA	NA	NA	NA	NA	NA	NA	NA	NA	NA	NA	NA	NA	NA
128	h1_chr15	5593151	C	A	intergenic_region	MODIFIER	h1_chr15+_g23581-h1_chr15-_g23582	C|A	A|A	NA	NA	NA	NA	NA	NA	NA	NA	NA	NA	NA	NA	NA	NA	NA	NA
129	h1_chr15	5593195	C	T	intergenic_region	MODIFIER	h1_chr15+_g23581-h1_chr15-_g23582	C|T	T|T	NA	NA	NA	NA	NA	NA	NA	NA	NA	NA	NA	NA	NA	NA	NA	NA
130	h1_chr15	5593229	TTGC	T	intergenic_region	MODIFIER	h1_chr15+_g23581-h1_chr15-_g23582	TTGC|T	T|T	NA	NA	NA	NA	NA	NA	NA	NA	NA	NA	NA	NA	NA	NA	NA	NA
131	h1_chr15	5593247	A	T	intergenic_region	MODIFIER	h1_chr15+_g23581-h1_chr15-_g23582	A|T	T|T	NA	NA	NA	NA	NA	NA	NA	NA	NA	NA	NA	NA	NA	NA	NA	NA
132	h1_chr15	5593255	TG	T	intergenic_region	MODIFIER	h1_chr15+_g23581-h1_chr15-_g23582	TG|T	T|T	NA	NA	NA	NA	NA	NA	NA	NA	NA	NA	NA	NA	NA	NA	NA	NA
133	h1_chr15	5593273	C	T	intergenic_region	MODIFIER	h1_chr15+_g23581-h1_chr15-_g23582	C|T	T|T	NA	NA	NA	NA	NA	NA	NA	NA	NA	NA	NA	NA	NA	NA	NA	NA
134	h1_chr15	5593277	C	T	intergenic_region	MODIFIER	h1_chr15+_g23581-h1_chr15-_g23582	C|T	T|T	NA	NA	NA	NA	NA	NA	NA	NA	NA	NA	NA	NA	NA	NA	NA	NA
135	h1_chr15	5593285	C	A	intergenic_region	MODIFIER	h1_chr15+_g23581-h1_chr15-_g23582	C|A	A|A	NA	NA	NA	NA	NA	NA	NA	NA	NA	NA	NA	NA	NA	NA	NA	NA
136	h1_chr15	5593287	C	G	intergenic_region	MODIFIER	h1_chr15+_g23581-h1_chr15-_g23582	C|G	G|G	NA	NA	NA	NA	NA	NA	NA	NA	NA	NA	NA	NA	NA	NA	NA	NA
137	h1_chr15	5593781	G	A	intergenic_region	MODIFIER	h1_chr15+_g23581-h1_chr15-_g23582	G|A	A|A	NA	NA	NA	NA	NA	NA	NA	NA	NA	NA	NA	NA	NA	NA	NA	NA
138	h1_chr15	5593801	C	A	intergenic_region	MODIFIER	h1_chr15+_g23581-h1_chr15-_g23582	C|A	A|A	NA	NA	NA	NA	NA	NA	NA	NA	NA	NA	NA	NA	NA	NA	NA	NA
139	h1_chr15	5594279	C	A	intergenic_region	MODIFIER	h1_chr15+_g23581-h1_chr15-_g23582	C|A	A|A	NA	NA	NA	NA	NA	NA	NA	NA	NA	NA	NA	NA	NA	NA	NA	NA
140	h1_chr15	5612744	C	T	upstream_gene_variant	MODIFIER	h1_chr15-_g23583	C|T	T|T	NA	NA	NA	C|T	C|T	C|T	NA	NA	NA	T|T	T|T	C|T	NA	same	NA	NA
141	h1_chr15	5614565	C	T	upstream_gene_variant	MODIFIER	h1_chr15-_g23583	C|T	T|T	NA	NA	NA	C|T	C|T	C|T	NA	NA	NA	C|T	T|T	C|T	NA	NA	NA	NA
142	h1_chr15	5614752	C	T	upstream_gene_variant	MODIFIER	h1_chr15-_g23583	C|T	T|T	NA	NA	NA	C|T	T|T	T|T	NA	NA	NA	T|T	T|T	T|T	NA	same	NA	NA
143	h1_chr15	5616079	G	A	downstream_gene_variant	MODIFIER	h1_chr15-_g23584	G|A	A|A	NA	NA	NA	G|A	NA	NA	NA	NA	NA	G|A	A|A	NA	NA	NA	NA	NA
144	h1_chr15	5616670	G	A	downstream_gene_variant	MODIFIER	h1_chr15-_g23584	G|A	A|A	NA	NA	NA	NA	NA	NA	NA	NA	NA	NA	NA	NA	NA	NA	NA	NA
145	h1_chr15	5616781	A	G	downstream_gene_variant	MODIFIER	h1_chr15-_g23584	A|G	G|G	NA	NA	NA	A|G	NA	NA	NA	NA	NA	A|G	G|G	NA	NA	NA	NA	NA
146	h1_chr15	5616846	ACT	A	downstream_gene_variant	MODIFIER	h1_chr15-_g23584	ACT|A	A|A	NA	NA	NA	ACT|A	NA	NA	NA	NA	NA	ACT|A	A|A	NA	NA	NA	NA	NA
147	h1_chr15	5619431	T	C	downstream_gene_variant	MODIFIER	h1_chr15-_g23584	T|C	C|C	T|T	T|T	T|T	T|C	NA	NA	T|T	T|T	T|C	C|C	C|C	NA	NA	same	NA	NA
148	h1_chr15	5670986	A	G	downstream_gene_variant	MODIFIER	h1_chr15+_g23588	A|G	G|G	G|G	G|G	G|G	A|G	NA	NA	G|G	G|G	G|G	G|G	G|G	NA	NA	same	NA	NA
149	h1_chr15	5677249	T	G	downstream_gene_variant	MODIFIER	h1_chr15-_g23589	T|G	G|G	G|G	G|G	G|G	T|G	T|G	T|G	G|G	G|G	G|G	G|G	G|G	G|G	NA	same	same	NA
150	h1_chr15	5677324	T	G	downstream_gene_variant	MODIFIER	h1_chr15-_g23589	T|G	G|G	G|G	G|G	G|G	T|G	T|G	T|G	G|G	G|G	G|G	G|G	G|G	G|G	NA	same	same	NA
151	h1_chr15	5677684	A	T	downstream_gene_variant	MODIFIER	h1_chr15-_g23589	A|T	T|T	T|T	T|T	T|T	A|T	A|T	A|T	T|T	T|T	T|T	T|T	T|T	T|T	NA	same	same	NA
152	h1_chr15	5677929	A	G	downstream_gene_variant	MODIFIER	h1_chr15-_g23589	A|G	G|G	G|G	G|G	G|G	A|G	A|G	A|G	G|G	G|G	G|G	G|G	G|G	G|G	NA	same	same	NA
153	h1_chr15	5677950	A	C	downstream_gene_variant	MODIFIER	h1_chr15-_g23589	A|C	C|C	C|C	C|C	C|C	A|C	A|C	A|C	C|C	C|C	C|C	C|C	C|C	C|C	NA	same	same	NA
154	h1_chr15	5795402	A	C	upstream_gene_variant	MODIFIER	h1_chr15-_g23599	A|C	C|C	C|C	C|C	C|C	A|C	C|C	C|C	C|C	C|C	C|C	C|C	C|C	C|C	NA	same	NA	NA
155	h1_chr15	5795814	C	G	upstream_gene_variant	MODIFIER	h1_chr15-_g23599	C|G	G|G	NA	NA	NA	C|G	G|G	G|G	NA	NA	NA	G|G	G|G	G|G	NA	same	NA	NA
156	h1_chr15	5799734	T	A	upstream_gene_variant	MODIFIER	h1_chr15-_g23600	T|A	A|A	NA	NA	NA	T|A	NA	NA	NA	NA	NA	A|A	A|A	NA	NA	same	NA	NA
157	h1_chr15	5799889	G	A	upstream_gene_variant	MODIFIER	h1_chr15-_g23600	G|A	A|A	A|A	A|A	A|A	G|A	NA	NA	A|A	A|A	A|A	G|A	A|A	NA	NA	NA	NA	NA
158	h1_chr15	5815407	A	T	downstream_gene_variant	MODIFIER	h1_chr15-_g23601	A|T	T|T	T|T	T|T	T|T	NA	T|T	T|T	T|T	T|T	T|T	NA	NA	T|T	NA	NA	NA	NA
159	h1_chr15	5815427	C	T	downstream_gene_variant	MODIFIER	h1_chr15-_g23601	C|T	T|T	NA	NA	NA	C|T	NA	NA	NA	NA	NA	T|T	T|T	NA	NA	same	NA	NA
160	h1_chr15	5816574	C	T	downstream_gene_variant	MODIFIER	h1_chr15-_g23601	C|T	T|T	NA	NA	NA	NA	NA	NA	NA	NA	NA	NA	NA	NA	NA	same	NA	NA
161	h1_chr15	5817190	G	A	downstream_gene_variant	MODIFIER	h1_chr15-_g23601	G|A	A|A	NA	NA	NA	NA	NA	NA	NA	NA	NA	NA	NA	NA	NA	same	NA	NA
162	h1_chr15	5832651	T	C	intron_variant	MODIFIER	h1_chr15+_g23602	T|C	C|C	NA	NA	NA	T|C	NA	NA	NA	NA	NA	C|C	T|C	NA	NA	NA	NA	NA
163	h1_chr15	5833767	T	C	intron_variant	MODIFIER	h1_chr15+_g23602	T|C	C|C	C|C	C|C	C|C	T|C	NA	NA	C|C	C|C	C|C	C|C	T|C	NA	NA	NA	NA	NA
164	h1_chr15	5836506	A	G	intron_variant	MODIFIER	h1_chr15+_g23602	A|G	G|G	G|G	G|G	G|G	A|G	G|G	G|G	G|G	G|G	G|G	G|G	G|G	G|G	NA	same	NA	NA
165	h1_chr15	5838595	G	A	intron_variant	MODIFIER	h1_chr15+_g23602	G|A	A|A	NA	NA	NA	NA	NA	NA	NA	NA	NA	NA	NA	NA	NA	same	NA	NA
166	h1_chr15	5847355	T	C	downstream_gene_variant	MODIFIER	h1_chr15+_g23602	T|C	C|C	C|C	C|C	C|C	T|C	C|C	C|C	T|C	C|C	C|C	C|C	C|C	C|C	NA	same	NA	NA
167	h1_chr15	5862139	C	T	downstream_gene_variant	MODIFIER	h1_chr15+_g23604	C|T	T|T	T|T	T|T	T|T	C|T	T|T	T|T	T|T	T|T	T|T	T|T	T|T	T|T	NA	same	NA	NA
168	h1_chr15	5863455	A	C	upstream_gene_variant	MODIFIER	h1_chr15-_g23606	A|C	C|C	C|C	C|C	C|C	A|C	C|C	C|C	C|C	C|C	C|C	C|C	C|C	C|C	NA	same	NA	NA
169	h1_chr15	5864934	C	T	upstream_gene_variant	MODIFIER	h1_chr15-_g23606	C|T	T|T	T|T	T|T	T|T	C|T	T|T	T|T	T|T	T|T	T|T	T|T	T|T	T|T	NA	same	NA	NA
170	h1_chr15	5867931	A	C	intergenic_region	MODIFIER	h1_chr15-_g23606-h1_chr15-_g23607	A|C	C|C	NA	NA	NA	NA	C|C	C|C	NA	NA	NA	NA	NA	C|C	NA	NA	NA	NA
171	h1_chr15	5867956	T	G	intergenic_region	MODIFIER	h1_chr15-_g23606-h1_chr15-_g23607	T|G	G|G	G|G	G|G	G|G	T|G	G|G	G|G	G|G	G|G	G|G	G|G	G|G	G|G	NA	same	NA	NA
172	h1_chr15	5869093	G	A	downstream_gene_variant	MODIFIER	h1_chr15-_g23607	G|A	A|A	A|A	A|A	A|A	G|A	A|A	A|A	A|A	A|A	A|A	A|A	A|A	A|A	NA	same	NA	NA
173	h1_chr15	5871957	A	G	downstream_gene_variant	MODIFIER	h1_chr15-_g23607	A|G	G|G	G|G	G|G	G|G	A|G	G|G	G|G	G|G	G|G	G|G	A|G	A|G	G|G	NA	NA	NA	NA
174	h1_chr15	5872496	C	G	downstream_gene_variant	MODIFIER	h1_chr15-_g23607	C|G	G|G	G|G	G|G	G|G	C|G	G|G	G|G	G|G	G|G	G|G	G|G	G|G	G|G	NA	same	NA	NA
175	h1_chr15	5879722	A	G	intergenic_region	MODIFIER	h1_chr15-_g23607-h1_chr15+_g23608	A|G	G|G	G|G	G|G	G|G	A|G	G|G	G|G	G|G	G|G	G|G	G|G	G|G	G|G	NA	same	NA	NA
176	h1_chr15	10861667	A	G	downstream_gene_variant	MODIFIER	h1_chr15+_g23836	A|G	G|G	G|G	G|G	G|G	G|G	G|G	G|G	G|G	G|G	G|G	.|.	.|.	G|G	NA	NA	NA	NA
177	h1_chr15	10862053	T	G	downstream_gene_variant	MODIFIER	h1_chr15+_g23836	T|G	G|G	G|G	G|G	G|G	G|G	G|G	G|G	G|G	G|G	G|G	G|G	G|G	G|G	NA	NA	NA	NA
178	h1_chr15	10862183	A	G	downstream_gene_variant	MODIFIER	h1_chr15+_g23836	A|G	G|G	G|G	G|G	G|G	G|G	G|G	G|G	G|G	G|G	G|G	G|G	G|G	G|G	NA	NA	NA	NA
179	h1_chr15	10869839	A	G	upstream_gene_variant	MODIFIER	h1_chr15+_g23838	A|G	G|G	G|G	G|G	G|G	G|G	G|G	G|G	G|G	G|G	G|G	.|.	.|.	G|G	NA	NA	NA	NA
180	h1_chr15	10870083	A	C	upstream_gene_variant	MODIFIER	h1_chr15+_g23838	A|C	C|C	C|C	C|C	C|C	C|C	C|C	C|C	C|C	C|C	C|C	C|C	.|.	C|C	NA	NA	NA	NA
181	h1_chr15	10870184	A	G	upstream_gene_variant	MODIFIER	h1_chr15+_g23838	A|G	G|G	G|G	G|G	G|G	G|G	G|G	G|G	G|G	G|G	G|G	.|.	.|.	G|G	NA	NA	NA	NA
182	h1_chr15	10870210	T	C	upstream_gene_variant	MODIFIER	h1_chr15+_g23838	T|C	C|C	C|C	C|C	C|C	C|C	C|C	C|C	C|C	C|C	C|C	.|.	.|.	C|C	NA	NA	NA	NA
183	h1_chr15	10870550	A	G	upstream_gene_variant	MODIFIER	h1_chr15+_g23838	A|G	G|G	G|G	G|G	G|G	G|G	G|G	G|G	G|G	G|G	G|G	A|A	A|A	G|G	NA	same	NA	NA
184	h1_chr15	10870594	C	G	upstream_gene_variant	MODIFIER	h1_chr15+_g23838	C|G	G|G	G|G	G|G	G|G	G|G	G|G	G|G	G|G	G|G	G|G	.|.	.|.	G|G	NA	NA	NA	NA
185	h1_chr15	10870623	A	G	upstream_gene_variant	MODIFIER	h1_chr15+_g23838	A|G	G|G	G|G	G|G	G|G	G|G	G|G	G|G	G|G	G|G	G|G	G|G	G|G	G|G	NA	NA	NA	NA
186	h1_chr15	10872446	T	C	upstream_gene_variant	MODIFIER	h1_chr15+_g23840	T|C	C|C	C|C	C|C	C|C	C|C	C|C	C|C	C|C	C|C	C|C	C|C	C|C	C|C	NA	NA	NA	NA
187	h1_chr15	10873330	T	C	upstream_gene_variant	MODIFIER	h1_chr15+_g23840	T|C	C|C	C|C	C|C	C|C	C|C	C|C	C|C	C|C	C|C	C|C	C|C	C|C	C|C	NA	NA	NA	NA
188	h1_chr15	10874387	G	C	upstream_gene_variant	MODIFIER	h1_chr15+_g23840	G|C	C|C	C|C	C|C	C|C	G|C	G|C	G|C	C|C	C|C	C|C	C|C	C|C	C|C	NA	same	same	NA
189	h1_chr15	10874530	G	GTAC	conservative_inframe_insertion	MODERATE	h1_chr15-_g23839	G|GTAC	GTAC|GTAC	GTAC|GTAC	GTAC|GTAC	GTAC|GTAC	GTAC|GTAC	GTAC|GTAC	GTAC|GTAC	GTAC|GTAC	GTAC|GTAC	GTAC|GTAC	GTAC|GTAC	GTAC|GTAC	GTAC|GTAC	NA	NA	NA	NA
190	h1_chr15	10875212	T	C	upstream_gene_variant	MODIFIER	h1_chr15-_g23839	T|C	C|C	C|C	C|C	C|C	C|C	C|C	C|C	C|C	C|C	C|C	C|C	C|C	C|C	NA	NA	NA	NA
191	h1_chr15	10883263	A	G	downstream_gene_variant	MODIFIER	h1_chr15+_g23840	A|G	G|G	G|G	G|G	G|G	G|G	NA	NA	G|G	G|G	G|G	G|G	G|G	NA	NA	NA	NA	NA
192	h1_chr15	10887208	CA	C	upstream_gene_variant	MODIFIER	h1_chr15-_g23841	CA|C	C|C	C|C	C|A	C|C	C|C	NA	NA	C|C	C|C	C|C	C|C	C|C	NA	NA	NA	NA	NA
193	h1_chr15	10887338	A	C	upstream_gene_variant	MODIFIER	h1_chr15-_g23841	A|C	C|C	NA	NA	NA	C|C	C|C	C|C	NA	NA	NA	C|C	C|C	C|C	NA	NA	NA	NA
194	h1_chr15	10893572	A	AT	downstream_gene_variant	MODIFIER	h1_chr15-_g23842	A|AT	AT|AT	AT|AT	AT|AT	AT|AT	NA	AT|AT	AT|AT	AT|AT	AT|AT	AT|AT	NA	NA	AT|AT	NA	NA	NA	NA
195	h1_chr15	10894291	G	T	downstream_gene_variant	MODIFIER	h1_chr15-_g23842	G|T	T|T	T|T	T|T	T|T	T|T	T|T	T|T	T|T	T|T	T|T	T|T	T|T	T|T	NA	NA	NA	NA
196	h1_chr15	10897168	G	A	intron_variant	MODIFIER	h1_chr15-_g23842	G|A	A|A	A|A	A|A	A|A	A|A	A|A	A|A	A|A	A|A	A|A	A|A	A|A	A|A	NA	NA	NA	NA
197	h1_chr15	10899982	G	A	intron_variant	MODIFIER	h1_chr15-_g23842	G|A	A|A	A|A	A|A	A|A	A|A	G|A	G|A	A|A	A|A	A|A	A|A	A|A	G|G	NA	NA	same	NA
198	h1_chr15	10901175	C	T	missense_variant	MODERATE	h1_chr15-_g23842	C|T	T|T	T|T	T|T	T|T	T|T	T|T	T|T	T|T	T|T	T|T	T|T	T|T	T|T	NA	NA	NA	NA
199	h1_chr15	10901203	A	G	intron_variant	MODIFIER	h1_chr15-_g23842	A|G	G|G	G|G	G|G	G|G	G|G	G|G	G|G	G|G	G|G	G|G	G|G	G|G	G|G	NA	NA	NA	NA
200	h1_chr15	10901703	T	C	intron_variant	MODIFIER	h1_chr15-_g23842	T|C	C|C	C|C	C|C	C|C	C|C	NA	NA	C|C	C|C	C|C	C|C	C|C	NA	NA	NA	NA	NA
201	h1_chr15	10902655	T	C	intron_variant	MODIFIER	h1_chr15-_g23842	T|C	C|C	C|C	C|C	C|C	C|C	T|C	T|C	C|C	C|C	C|C	C|C	C|C	T|T	NA	NA	same	NA
202	h1_chr15	10903247	A	G	intron_variant	MODIFIER	h1_chr15-_g23842	A|G	G|G	NA	NA	NA	NA	A|G	A|G	NA	NA	NA	NA	NA	A|A	NA	NA	same	NA
203	h1_chr15	10904017	T	C	upstream_gene_variant	MODIFIER	h1_chr15-_g23842	T|C	C|C	C|C	C|C	C|C	C|C	T|C	T|C	C|C	C|C	C|C	C|C	C|C	T|T	NA	NA	same	NA
204	h1_chr15	10904254	G	A	upstream_gene_variant	MODIFIER	h1_chr15-_g23842	G|A	A|A	A|A	A|A	A|A	A|A	G|A	G|A	A|A	A|A	A|A	A|A	A|A	G|G	NA	NA	same	NA
205	h1_chr15	10904339	TA	T	upstream_gene_variant	MODIFIER	h1_chr15-_g23842	TA|T	T|T	T|T	T|T	T|T	T|T	T|T	T|T	T|T	T|T	T|T	T|T	T|T	T|T	NA	NA	NA	NA
206	h1_chr15	10904405	A	G	upstream_gene_variant	MODIFIER	h1_chr15-_g23842	A|G	G|G	G|G	G|G	G|G	NA	A|G	A|G	G|G	G|G	G|G	NA	NA	A|A	NA	NA	same	NA
207	h1_chr15	10904573	A	G	upstream_gene_variant	MODIFIER	h1_chr15-_g23842	A|G	G|G	G|G	G|G	G|G	G|G	A|G	A|G	G|G	G|G	G|G	G|G	G|G	A|A	NA	NA	same	NA
208	h1_chr15	10904624	T	C	upstream_gene_variant	MODIFIER	h1_chr15-_g23842	T|C	C|C	C|C	C|C	C|C	C|C	T|C	T|C	C|C	C|C	C|C	C|C	C|C	T|T	NA	NA	same	NA
209	h1_chr15	10904826	C	CT	upstream_gene_variant	MODIFIER	h1_chr15-_g23842	C|CT	CT|CT	CT|CT	CT|CT	CT|CT	CT|CT	CT|CT	CT|CT	CT|CT	CT|CT	CT|CT	CT|CT	CT|CT	CT|CT	NA	NA	NA	NA
210	h1_chr15	10904917	C	CA	upstream_gene_variant	MODIFIER	h1_chr15-_g23842	C|CA	CA|CA	CA|CA	CA|CA	CA|CA	CA|CA	NA	NA	CA|CA	CA|CA	CA|CA	CA|CA	CA|CA	NA	NA	NA	NA	NA
211	h1_chr15	10907552	G	A	upstream_gene_variant	MODIFIER	h1_chr15-_g23842	G|A	A|A	A|A	A|A	A|A	NA	G|A	G|A	A|A	A|A	A|A	NA	NA	G|G	NA	NA	same	NA
212	h1_chr15	10907623	T	C	upstream_gene_variant	MODIFIER	h1_chr15-_g23842	T|C	C|C	C|C	C|C	C|C	NA	T|C	T|C	C|C	C|C	C|C	NA	NA	T|T	NA	NA	same	NA
213	h1_chr15	10907836	T	C	upstream_gene_variant	MODIFIER	h1_chr15-_g23842	T|C	C|C	C|C	C|C	C|C	C|C	T|C	C|C	C|C	C|C	C|C	.|.	T|T	C|C	NA	NA	NA	NA
214	h1_chr15	10907858	T	C	upstream_gene_variant	MODIFIER	h1_chr15-_g23842	T|C	C|C	NA	NA	NA	NA	T|C	T|C	NA	NA	NA	NA	NA	T|T	same	NA	same	NA
215	h1_chr15	10907938	A	G	upstream_gene_variant	MODIFIER	h1_chr15-_g23842	A|G	G|G	NA	NA	NA	G|G	G|G	G|G	NA	NA	NA	G|G	G|G	G|G	NA	NA	NA	NA
216	h1_chr15	10907990	C	T	upstream_gene_variant	MODIFIER	h1_chr15-_g23842	C|T	T|T	T|T	T|T	T|T	T|T	C|T	C|T	T|T	T|T	T|T	T|T	T|T	C|C	NA	NA	same	NA
217	h1_chr15	10908406	A	C	upstream_gene_variant	MODIFIER	h1_chr15-_g23842	A|C	C|C	C|C	C|C	C|C	C|C	A|C	A|C	C|C	C|C	C|C	C|C	C|C	A|A	NA	NA	same	NA
218	h1_chr15	10908882	T	C	downstream_gene_variant	MODIFIER	h1_chr15-_g23843	T|C	C|C	NA	NA	NA	NA	C|C	C|C	NA	NA	NA	NA	NA	C|C	NA	NA	NA	NA
219	h1_chr15	10909082	A	G	downstream_gene_variant	MODIFIER	h1_chr15-_g23843	A|G	G|G	G|G	G|G	G|G	G|G	G|G	G|G	G|G	G|G	G|G	G|G	.|.	G|G	NA	NA	NA	NA
220	h1_chr15	10909321	T	C	downstream_gene_variant	MODIFIER	h1_chr15-_g23843	T|C	C|C	C|C	C|C	C|C	C|C	T|C	T|C	C|C	C|C	C|C	C|C	C|C	T|T	NA	NA	same	NA
221	h1_chr15	10909734	T	C	downstream_gene_variant	MODIFIER	h1_chr15-_g23843	T|C	C|C	T|C	T|C	T|C	NA	T|C	T|C	T|T	T|C	T|C	NA	NA	T|T	NA	NA	same	NA
222	h1_chr15	10911895	A	G	downstream_gene_variant	MODIFIER	h1_chr15-_g23844	A|G	G|G	G|G	G|G	G|G	G|G	A|G	A|G	G|G	G|G	G|G	G|G	G|G	A|G	NA	NA	NA	NA
223	h1_chr15	10912646	A	C	downstream_gene_variant	MODIFIER	h1_chr15-_g23844	A|C	C|C	NA	NA	NA	C|C	A|C	A|C	NA	NA	NA	C|C	C|C	A|C	NA	NA	NA	NA
224	h1_chr15	10913017	T	C	downstream_gene_variant	MODIFIER	h1_chr15-_g23844	T|C	C|C	C|C	C|C	C|C	C|C	C|C	C|C	C|C	C|C	C|C	T|C	C|C	C|C	NA	NA	NA	NA
225	h1_chr15	10913277	T	A	downstream_gene_variant	MODIFIER	h1_chr15-_g23844	T|A	A|A	NA	NA	NA	NA	NA	NA	NA	NA	NA	NA	NA	NA	NA	NA	NA	NA
226	h1_chr15	10913395	A	G	stop_lost&splice_region_variant	HIGH	h1_chr15-_g23844	A|G	G|G	G|G	G|G	G|G	G|G	A|G	A|G	G|G	G|G	G|G	.|.	.|.	A|A	NA	NA	same	NA
227	h1_chr15	10915293	A	G	upstream_gene_variant	MODIFIER	h1_chr15-_g23844	A|G	G|G	G|G	G|G	G|G	G|G	A|G	A|G	G|G	G|G	G|G	G|G	G|G	A|G	NA	NA	NA	NA
228	h1_chr15	10915949	CA	C	frameshift_variant	HIGH	h1_chr15-_g23843	CA|C	C|C	C|C	C|C	C|C	C|C	C|C	C|C	C|C	C|C	C|C	C|C	.|.	C|C	NA	NA	NA	NA
229	h1_chr15	10938381	C	T	synonymous_variant	LOW	h1_chr15-_g23846	C|T	T|T	T|T	T|T	T|T	C|T	NA	NA	T|T	T|T	T|T	T|T	T|T	NA	NA	same	NA	NA
230	h1_chr15	10938644	C	T	upstream_gene_variant	MODIFIER	h1_chr15-_g23846	C|T	T|T	T|T	T|T	T|T	T|T	C|T	C|T	T|T	T|T	T|T	T|T	T|T	T|T	NA	NA	same	NA
231	h1_chr15	10939773	T	G	upstream_gene_variant	MODIFIER	h1_chr15-_g23846	T|G	G|G	G|G	G|G	G|G	G|G	NA	NA	G|G	G|G	T|G	G|G	G|G	NA	NA	NA	NA	NA
232	h1_chr15	10940434	C	T	upstream_gene_variant	MODIFIER	h1_chr15-_g23846	C|T	T|T	T|T	T|T	T|T	T|T	NA	NA	T|T	T|T	T|T	T|T	T|T	NA	NA	NA	NA	NA
233	h1_chr15	10941669	A	G	upstream_gene_variant	MODIFIER	h1_chr15-_g23846	A|G	G|G	G|G	G|G	G|G	G|G	NA	NA	G|G	G|G	G|G	G|G	G|G	NA	NA	NA	NA	NA
234	h1_chr15	10941838	A	G	upstream_gene_variant	MODIFIER	h1_chr15-_g23846	A|G	G|G	G|G	G|G	G|G	G|G	NA	NA	G|G	G|G	G|G	G|G	G|G	NA	NA	NA	NA	NA
235	h1_chr15	10942434	T	TC	upstream_gene_variant	MODIFIER	h1_chr15-_g23846	T|TC	TC|TC	TC|TC	TC|TC	TC|TC	TC|TC	NA	NA	TC|TC	TC|TC	TC|TC	TC|TC	TC|TC	NA	NA	NA	NA	NA
236	h1_chr15	10942477	A	G	upstream_gene_variant	MODIFIER	h1_chr15-_g23846	A|G	G|G	G|G	G|G	G|G	G|G	NA	NA	G|G	G|G	G|G	G|G	G|G	NA	NA	NA	NA	NA
237	h1_chr15	10944666	A	G	intergenic_region	MODIFIER	h1_chr15-_g23846-h1_chr15-_g23847	A|G	G|G	G|G	G|G	G|G	G|G	NA	NA	G|G	G|G	G|G	.|.	.|.	NA	NA	NA	NA	NA
238	h1_chr15	10944768	A	T	intergenic_region	MODIFIER	h1_chr15-_g23846-h1_chr15-_g23847	A|T	T|T	T|T	T|T	T|T	T|T	NA	NA	T|T	T|T	T|T	T|T	T|T	NA	NA	NA	NA	NA
239	h1_chr15	10945142	A	G	intergenic_region	MODIFIER	h1_chr15-_g23846-h1_chr15-_g23847	A|G	G|G	G|G	G|G	G|G	G|G	NA	NA	G|G	G|G	G|G	.|.	.|.	NA	NA	NA	NA	NA
240	h1_chr15	10945161	T	G	intergenic_region	MODIFIER	h1_chr15-_g23846-h1_chr15-_g23847	T|G	G|G	T|G	T|G	T|G	G|G	NA	NA	G|G	G|G	G|G	.|.	.|.	NA	same	NA	NA	NA
241	h1_chr15	10945667	G	A	intergenic_region	MODIFIER	h1_chr15-_g23846-h1_chr15-_g23847	G|A	A|A	A|A	A|A	A|A	A|A	NA	NA	A|A	A|A	A|A	A|A	A|A	NA	NA	NA	NA	NA
242	h1_chr15	10945680	C	T	intergenic_region	MODIFIER	h1_chr15-_g23846-h1_chr15-_g23847	C|T	T|T	C|T	C|T	C|T	T|T	NA	NA	T|T	T|T	T|T	T|T	T|T	NA	same	NA	NA	NA
243	h1_chr15	10946402	G	T	intergenic_region	MODIFIER	h1_chr15-_g23846-h1_chr15-_g23847	G|T	T|T	T|T	T|T	T|T	G|A	G|T	G|T	T|T	T|T	T|T	G|G	G|G	T|T	NA	same	same	NA
244	h1_chr15	10946551	A	AT	intergenic_region	MODIFIER	h1_chr15-_g23846-h1_chr15-_g23847	A|AT	AT|AT	AT|AT	AT|AT	AT|AT	NA	NA	NA	AT|AT	AT|AT	AT|AT	NA	NA	NA	NA	NA	NA	NA
245	h1_chr15	10946603	C	G	intergenic_region	MODIFIER	h1_chr15-_g23846-h1_chr15-_g23847	C|G	G|G	G|G	G|G	G|G	G|G	C|G	C|G	G|G	G|G	G|G	G|G	G|G	C|C	NA	NA	same	NA
246	h1_chr15	10946608	A	G	intergenic_region	MODIFIER	h1_chr15-_g23846-h1_chr15-_g23847	A|G	G|G	A|G	A|G	A|G	G|G	NA	NA	A|A	A|A	A|A	G|G	G|G	NA	same	NA	NA	NA
247	h1_chr15	10946712	G	A	intergenic_region	MODIFIER	h1_chr15-_g23846-h1_chr15-_g23847	G|A	A|A	A|A	A|A	A|A	A|A	NA	NA	A|A	A|A	A|A	A|A	A|A	NA	NA	NA	NA	NA
248	h1_chr15	10946802	C	A	intergenic_region	MODIFIER	h1_chr15-_g23846-h1_chr15-_g23847	C|A	A|A	NA	NA	NA	NA	NA	NA	NA	NA	NA	NA	NA	NA	same	NA	NA	NA
249	h1_chr15	10946835	T	C	intergenic_region	MODIFIER	h1_chr15-_g23846-h1_chr15-_g23847	T|C	C|C	C|C	C|C	C|C	T|C	T|C	T|C	C|C	C|C	C|C	C|C	C|C	T|T	NA	same	same	NA
250	h1_chr15	10946862	C	A	intergenic_region	MODIFIER	h1_chr15-_g23846-h1_chr15-_g23847	C|A	A|A	A|A	A|A	A|A	NA	NA	NA	A|A	A|A	A|A	NA	NA	NA	NA	NA	NA	NA
251	h1_chr15	10947004	T	G	intergenic_region	MODIFIER	h1_chr15-_g23846-h1_chr15-_g23847	T|G	G|G	NA	NA	NA	G|G	NA	NA	NA	NA	NA	G|G	G|G	NA	NA	NA	NA	NA
252	h1_chr15	10947049	T	C	intergenic_region	MODIFIER	h1_chr15-_g23846-h1_chr15-_g23847	T|C	C|C	C|C	C|C	C|C	C|C	NA	NA	C|C	C|C	C|C	C|C	C|C	NA	NA	NA	NA	NA
253	h1_chr15	10947053	AAT	A	intergenic_region	MODIFIER	h1_chr15-_g23846-h1_chr15-_g23847	AAT|A	A|A	A|A	A|A	A|A	AAT|A	NA	NA	A|A	A|A	A|A	A|A	A|A	NA	NA	same	NA	NA
254	h1_chr15	10947093	T	C	intergenic_region	MODIFIER	h1_chr15-_g23846-h1_chr15-_g23847	T|C	C|C	C|C	C|C	C|C	NA	NA	NA	C|C	C|C	C|C	NA	NA	NA	NA	NA	NA	NA
255	h1_chr15	10947109	C	A	intergenic_region	MODIFIER	h1_chr15-_g23846-h1_chr15-_g23847	C|A	A|A	A|A	A|A	A|A	NA	NA	NA	A|A	A|A	A|A	NA	NA	NA	NA	NA	NA	NA
256	h1_chr15	10947159	A	C	intergenic_region	MODIFIER	h1_chr15-_g23846-h1_chr15-_g23847	A|C	C|C	C|C	C|C	C|C	C|C	NA	NA	C|C	C|C	C|C	C|C	C|C	NA	NA	NA	NA	NA
257	h1_chr15	10947221	A	G	intergenic_region	MODIFIER	h1_chr15-_g23846-h1_chr15-_g23847	A|G	G|G	G|G	G|G	G|G	G|G	NA	NA	G|G	G|G	G|G	G|G	G|G	NA	NA	NA	NA	NA
258	h1_chr15	10947368	C	T	intergenic_region	MODIFIER	h1_chr15-_g23846-h1_chr15-_g23847	C|T	T|T	T|T	T|T	T|T	T|T	NA	NA	T|T	T|T	T|T	T|T	T|T	NA	NA	NA	NA	NA
259	h1_chr15	10947369	A	T	intergenic_region	MODIFIER	h1_chr15-_g23846-h1_chr15-_g23847	A|T	T|T	T|T	T|T	T|T	T|T	NA	NA	T|T	T|T	T|T	T|T	T|T	NA	NA	NA	NA	NA
260	h1_chr15	10947494	G	A	intergenic_region	MODIFIER	h1_chr15-_g23846-h1_chr15-_g23847	G|A	A|A	A|A	A|A	A|A	NA	NA	NA	A|A	A|A	A|A	NA	NA	NA	NA	NA	NA	NA
261	h1_chr15	10947504	A	G	intergenic_region	MODIFIER	h1_chr15-_g23846-h1_chr15-_g23847	A|G	G|G	G|G	G|G	G|G	G|G	NA	NA	G|G	G|G	G|G	G|G	G|G	NA	NA	NA	NA	NA
262	h1_chr15	10947509	A	G	intergenic_region	MODIFIER	h1_chr15-_g23846-h1_chr15-_g23847	A|G	G|G	G|G	G|G	G|G	G|G	NA	NA	G|G	G|G	G|G	G|G	G|G	NA	NA	NA	NA	NA
263	h1_chr15	10947520	C	T	intergenic_region	MODIFIER	h1_chr15-_g23846-h1_chr15-_g23847	C|T	T|T	T|T	T|T	T|T	NA	NA	NA	T|T	T|T	T|T	NA	NA	NA	NA	NA	NA	NA
264	h1_chr15	10947548	C	A	intergenic_region	MODIFIER	h1_chr15-_g23846-h1_chr15-_g23847	C|A	A|A	A|A	A|A	A|A	NA	NA	NA	A|A	A|A	A|A	NA	NA	NA	NA	NA	NA	NA
265	h1_chr15	10947571	C	A	intergenic_region	MODIFIER	h1_chr15-_g23846-h1_chr15-_g23847	C|A	A|A	A|A	A|A	A|A	A|A	NA	NA	A|A	A|A	A|A	A|A	A|A	NA	NA	NA	NA	NA
266	h1_chr15	10947669	A	C	intergenic_region	MODIFIER	h1_chr15-_g23846-h1_chr15-_g23847	A|C	C|C	C|C	C|C	C|C	C|C	NA	NA	C|C	C|C	C|C	C|C	C|C	NA	NA	NA	NA	NA
267	h1_chr15	10947684	C	A	intergenic_region	MODIFIER	h1_chr15-_g23846-h1_chr15-_g23847	C|A	A|A	A|A	A|A	A|A	NA	NA	NA	A|A	A|A	A|A	NA	NA	NA	NA	NA	NA	NA
268	h1_chr15	10947685	C	T	intergenic_region	MODIFIER	h1_chr15-_g23846-h1_chr15-_g23847	C|T	T|T	T|T	T|T	T|T	NA	NA	NA	T|T	T|T	T|T	NA	NA	NA	NA	NA	NA	NA
269	h1_chr15	10947775	T	C	intergenic_region	MODIFIER	h1_chr15-_g23846-h1_chr15-_g23847	T|C	C|C	C|C	C|C	C|C	T|C	NA	NA	C|C	C|C	C|C	C|C	C|C	NA	NA	same	NA	NA
270	h1_chr15	10947824	T	A	intergenic_region	MODIFIER	h1_chr15-_g23846-h1_chr15-_g23847	T|A	A|A	A|A	A|A	A|A	A|A	A|A	A|A	A|A	A|A	A|A	A|A	A|A	A|A	NA	NA	NA	NA
271	h1_chr15	10947828	A	G	intergenic_region	MODIFIER	h1_chr15-_g23846-h1_chr15-_g23847	A|G	G|G	G|G	G|G	G|G	G|G	NA	NA	G|G	G|G	G|G	G|G	G|G	NA	NA	NA	NA	NA
272	h1_chr15	10947894	A	T	intergenic_region	MODIFIER	h1_chr15-_g23846-h1_chr15-_g23847	A|T	T|T	T|T	T|T	T|T	T|T	NA	NA	T|T	T|T	T|T	T|T	T|T	NA	NA	NA	NA	NA
273	h1_chr15	10947920	T	C	intergenic_region	MODIFIER	h1_chr15-_g23846-h1_chr15-_g23847	T|C	C|C	C|C	C|C	C|C	C|C	NA	NA	C|C	C|C	C|C	C|C	C|C	NA	NA	NA	NA	NA
274	h1_chr15	10948008	G	A	intergenic_region	MODIFIER	h1_chr15-_g23846-h1_chr15-_g23847	G|A	A|A	A|A	A|A	A|A	NA	NA	NA	A|A	A|A	A|A	NA	NA	NA	NA	NA	NA	NA
275	h1_chr15	10948371	A	T	intergenic_region	MODIFIER	h1_chr15-_g23846-h1_chr15-_g23847	A|T	T|T	T|T	T|T	T|T	NA	NA	NA	T|T	T|T	T|T	NA	NA	NA	NA	NA	NA	NA
276	h1_chr15	10948376	T	C	intergenic_region	MODIFIER	h1_chr15-_g23846-h1_chr15-_g23847	T|C	C|C	C|C	C|C	C|C	C|C	T|C	T|C	C|C	C|C	C|C	C|C	C|C	T|T	NA	NA	same	NA
277	h1_chr15	10948883	A	AT	intergenic_region	MODIFIER	h1_chr15-_g23846-h1_chr15-_g23847	A|AT	AT|AT	AT|AT	AT|AT	AT|AT	AT|AT	NA	NA	AT|AT	AT|AT	AT|AT	AT|AT	AT|AT	NA	NA	NA	NA	NA
278	h1_chr15	10948889	C	T	intergenic_region	MODIFIER	h1_chr15-_g23846-h1_chr15-_g23847	C|T	T|T	T|T	T|T	T|T	NA	NA	NA	C|T	T|T	T|T	NA	NA	NA	NA	NA	NA	NA
279	h1_chr15	10949000	T	A	intergenic_region	MODIFIER	h1_chr15-_g23846-h1_chr15-_g23847	T|A	A|A	A|A	A|A	A|A	A|A	NA	NA	A|A	A|A	A|A	A|A	A|A	NA	NA	NA	NA	NA
280	h1_chr15	10949086	C	T	intergenic_region	MODIFIER	h1_chr15-_g23846-h1_chr15-_g23847	C|T	T|T	T|T	T|T	T|T	NA	C|T	C|T	T|T	T|T	T|T	NA	NA	C|C	NA	same	same	NA
281	h1_chr15	10949151	T	C	intergenic_region	MODIFIER	h1_chr15-_g23846-h1_chr15-_g23847	T|C	C|C	C|C	C|C	C|C	C|C	NA	NA	C|C	C|C	C|C	C|C	C|C	NA	NA	NA	NA	NA
282	h1_chr15	10949242	A	C	intergenic_region	MODIFIER	h1_chr15-_g23846-h1_chr15-_g23847	A|C	C|C	C|C	C|C	C|C	NA	NA	NA	C|C	C|C	C|C	NA	NA	NA	NA	NA	NA	NA
283	h1_chr15	10949249	T	C	intergenic_region	MODIFIER	h1_chr15-_g23846-h1_chr15-_g23847	T|C	C|C	C|C	C|C	C|C	C|C	NA	NA	C|C	C|C	C|C	C|C	C|C	NA	NA	NA	NA	NA
284	h1_chr15	10949277	C	T	intergenic_region	MODIFIER	h1_chr15-_g23846-h1_chr15-_g23847	C|T	T|T	T|T	T|T	T|T	NA	NA	NA	T|T	T|T	T|T	NA	NA	NA	NA	NA	NA	NA
285	h1_chr15	10949297	C	A	intergenic_region	MODIFIER	h1_chr15-_g23846-h1_chr15-_g23847	C|A	A|A	A|A	A|A	A|A	NA	NA	NA	A|A	A|A	A|A	NA	NA	NA	NA	NA	NA	NA
286	h1_chr15	10949304	A	C	intergenic_region	MODIFIER	h1_chr15-_g23846-h1_chr15-_g23847	A|C	C|C	C|C	C|C	C|C	C|C	NA	NA	C|C	C|C	C|C	C|C	C|C	NA	NA	NA	NA	NA
287	h1_chr15	10949319	A	G	intergenic_region	MODIFIER	h1_chr15-_g23846-h1_chr15-_g23847	A|G	G|G	G|G	G|G	G|G	A|G	G|G	G|G	G|G	G|G	G|G	G|G	G|G	G|G	NA	same	NA	NA
288	h1_chr15	10949399	T	C	intergenic_region	MODIFIER	h1_chr15-_g23846-h1_chr15-_g23847	T|C	C|C	C|C	C|C	C|C	C|C	NA	NA	C|C	C|C	C|C	C|C	C|C	NA	NA	NA	NA	NA
289	h1_chr15	10949408	C	CT	intergenic_region	MODIFIER	h1_chr15-_g23846-h1_chr15-_g23847	C|CT	CT|CT	NA	NA	NA	NA	NA	NA	NA	NA	NA	NA	NA	NA	NA	NA	NA	NA
290	h1_chr15	10949409	C	T	intergenic_region	MODIFIER	h1_chr15-_g23846-h1_chr15-_g23847	C|T	T|T	T|T	T|T	T|T	T|T	NA	NA	T|T	T|T	T|T	T|T	T|T	NA	NA	NA	NA	NA
291	h1_chr15	10949456	T	C	intergenic_region	MODIFIER	h1_chr15-_g23846-h1_chr15-_g23847	T|C	C|C	C|C	C|C	C|C	T|C	NA	NA	C|C	C|C	C|C	C|C	C|C	NA	NA	same	NA	NA
292	h1_chr15	10949509	C	T	intergenic_region	MODIFIER	h1_chr15-_g23846-h1_chr15-_g23847	C|T	T|T	T|T	T|T	T|T	NA	NA	NA	T|T	T|T	T|T	NA	NA	NA	NA	NA	NA	NA
293	h1_chr15	10949531	TG	T	intergenic_region	MODIFIER	h1_chr15-_g23846-h1_chr15-_g23847	TG|T	T|T	T|T	T|T	T|T	NA	NA	NA	T|T	T|T	T|T	NA	NA	NA	NA	NA	NA	NA
294	h1_chr15	10949635	A	G	intergenic_region	MODIFIER	h1_chr15-_g23846-h1_chr15-_g23847	A|G	G|G	G|G	G|G	G|G	G|G	NA	NA	G|G	G|G	G|G	G|G	G|G	NA	NA	NA	NA	NA
295	h1_chr15	10949705	T	C	intergenic_region	MODIFIER	h1_chr15-_g23846-h1_chr15-_g23847	T|C	C|C	C|C	C|C	C|C	T|C	C|C	C|C	C|C	C|C	C|C	T|T	T|T	C|C	NA	same	NA	NA
296	h1_chr15	10949722	C	T	intergenic_region	MODIFIER	h1_chr15-_g23846-h1_chr15-_g23847	C|T	T|T	T|T	T|T	T|T	C|T	NA	NA	T|T	T|T	T|T	C|C	C|C	NA	NA	same	NA	NA
297	h1_chr15	10949810	T	C	intergenic_region	MODIFIER	h1_chr15-_g23846-h1_chr15-_g23847	T|C	C|C	C|C	C|C	C|C	C|C	NA	NA	C|C	C|C	C|C	C|C	C|C	NA	NA	NA	NA	NA
298	h1_chr15	10949837	GC	G	intergenic_region	MODIFIER	h1_chr15-_g23846-h1_chr15-_g23847	GC|G	G|G	G|G	G|G	G|G	G|G	G|G	G|G	G|G	G|G	G|G	G|G	G|G	G|G	NA	NA	NA	NA
299	h1_chr15	10949839	A	T	intergenic_region	MODIFIER	h1_chr15-_g23846-h1_chr15-_g23847	A|T	T|T	T|T	T|T	T|T	T|T	T|T	T|T	T|T	T|T	T|T	T|T	T|T	T|T	NA	NA	NA	NA
300	h1_chr15	10949888	C	T	intergenic_region	MODIFIER	h1_chr15-_g23846-h1_chr15-_g23847	C|T	T|T	T|T	T|T	T|T	NA	NA	NA	T|T	T|T	T|T	NA	NA	NA	NA	NA	NA	NA
301	h1_chr15	10949895	A	T	intergenic_region	MODIFIER	h1_chr15-_g23846-h1_chr15-_g23847	A|T	T|T	T|T	T|T	T|T	T|T	NA	NA	T|T	T|T	T|T	T|T	T|T	NA	NA	NA	NA	NA
302	h1_chr15	10949896	A	T	intergenic_region	MODIFIER	h1_chr15-_g23846-h1_chr15-_g23847	A|T	T|T	T|T	T|T	T|T	T|T	NA	NA	T|T	T|T	T|T	T|T	T|T	NA	NA	NA	NA	NA
303	h1_chr15	10949917	A	G	intergenic_region	MODIFIER	h1_chr15-_g23846-h1_chr15-_g23847	A|G	G|G	G|G	G|G	G|G	G|G	G|G	G|G	G|G	G|G	G|G	G|G	G|G	G|G	NA	NA	NA	NA
304	h1_chr15	10949995	AT	A	intergenic_region	MODIFIER	h1_chr15-_g23846-h1_chr15-_g23847	AT|A	A|A	A|A	A|A	A|A	NA	NA	NA	A|A	A|A	A|A	NA	NA	NA	NA	NA	NA	NA
305	h1_chr15	10950006	A	G	intergenic_region	MODIFIER	h1_chr15-_g23846-h1_chr15-_g23847	A|G	G|G	G|G	G|G	G|G	G|G	G|G	G|G	G|G	G|G	G|G	G|G	G|G	G|G	NA	NA	NA	NA
306	h1_chr15	10950060	G	A	intergenic_region	MODIFIER	h1_chr15-_g23846-h1_chr15-_g23847	G|A	A|A	A|A	A|A	A|A	G|A	NA	NA	A|A	A|A	A|A	G|G	G|G	NA	NA	same	NA	NA
307	h1_chr15	10950075	G	A	intergenic_region	MODIFIER	h1_chr15-_g23846-h1_chr15-_g23847	G|A	A|A	A|A	A|A	A|A	NA	NA	NA	A|A	A|A	A|A	NA	NA	NA	NA	NA	NA	NA
308	h1_chr15	10950105	T	C	intergenic_region	MODIFIER	h1_chr15-_g23846-h1_chr15-_g23847	T|C	C|C	C|C	C|C	C|C	C|C	C|C	C|C	C|C	C|C	C|C	C|C	C|C	C|C	NA	NA	NA	NA
309	h1_chr15	10950109	T	G	intergenic_region	MODIFIER	h1_chr15-_g23846-h1_chr15-_g23847	T|G	G|G	G|G	G|G	G|G	G|G	NA	NA	G|G	G|G	G|G	G|G	G|G	NA	NA	NA	NA	NA
310	h1_chr15	10950365	A	T	intergenic_region	MODIFIER	h1_chr15-_g23846-h1_chr15-_g23847	A|T	T|T	T|T	T|T	T|T	T|T	NA	NA	T|T	T|T	T|T	T|T	T|T	NA	NA	NA	NA	NA
311	h1_chr15	10950379	C	G	intergenic_region	MODIFIER	h1_chr15-_g23846-h1_chr15-_g23847	C|G	G|G	G|G	G|G	G|G	G|G	NA	NA	G|G	G|G	G|G	G|G	G|G	NA	NA	NA	NA	NA
312	h1_chr15	10950386	G	C	intergenic_region	MODIFIER	h1_chr15-_g23846-h1_chr15-_g23847	G|C	C|C	C|C	C|C	C|C	C|C	NA	NA	C|C	C|C	C|C	C|C	C|C	NA	NA	NA	NA	NA
313	h1_chr15	10950397	T	G	intergenic_region	MODIFIER	h1_chr15-_g23846-h1_chr15-_g23847	T|G	G|G	G|G	G|G	G|G	G|G	NA	NA	G|G	G|G	G|G	G|G	G|G	NA	NA	NA	NA	NA
314	h1_chr15	10950429	GTTCT	G	downstream_gene_variant	MODIFIER	h1_chr15-_g23847	GTTCT|G	G|G	*|G	*|G	*|G	G|A	NA	NA	*|*	*|*	*|*	G|G	G|A	NA	same	NA	NA	NA
315	h1_chr15	10950438	A	G	downstream_gene_variant	MODIFIER	h1_chr15-_g23847	A|G	G|G	NA	NA	NA	A|G	G|G	G|G	NA	NA	NA	G|G	G|G	G|G	same	same	NA	NA
316	h1_chr15	10950456	A	C	downstream_gene_variant	MODIFIER	h1_chr15-_g23847	A|C	C|C	C|C	C|C	C|C	A|C	NA	NA	C|C	C|C	C|C	C|C	C|C	NA	NA	same	NA	NA
317	h1_chr15	10950458	A	AT	downstream_gene_variant	MODIFIER	h1_chr15-_g23847	A|AT	AT|AT	AT|AT	AT|AT	AT|AT	NA	NA	NA	AT|AT	AT|AT	AT|AT	NA	NA	NA	NA	NA	NA	NA
318	h1_chr15	10950498	TTC	T	downstream_gene_variant	MODIFIER	h1_chr15-_g23847	TTC|T	T|T	T|T	T|T	T|T	TTC|T	NA	NA	T|T	T|T	T|T	T|T	T|T	NA	NA	same	NA	NA
319	h1_chr15	10950502	T	TGAA	downstream_gene_variant	MODIFIER	h1_chr15-_g23847	T|TGAA	TGAA|TGAA	TGAA|TGAA	TGAA|TGAA	TGAA|TGAA	NA	NA	NA	TGAA|TGAA	TGAA|TGAA	TGAA|TGAA	NA	NA	NA	NA	NA	NA	NA
320	h1_chr15	10950517	A	G	downstream_gene_variant	MODIFIER	h1_chr15-_g23847	A|G	G|G	G|G	G|G	G|G	NA	NA	NA	G|G	G|G	A|G	NA	NA	NA	NA	same	NA	NA
321	h1_chr15	10950585	C	T	downstream_gene_variant	MODIFIER	h1_chr15-_g23847	C|T	T|T	T|T	T|T	T|T	T|T	NA	NA	T|T	T|T	T|T	T|T	T|T	NA	NA	NA	NA	NA
322	h1_chr15	10950675	A	G	downstream_gene_variant	MODIFIER	h1_chr15-_g23847	A|G	G|G	G|G	G|G	G|G	G|G	NA	NA	G|G	G|G	G|G	G|G	G|G	NA	NA	NA	NA	NA
323	h1_chr15	10950717	G	A	downstream_gene_variant	MODIFIER	h1_chr15-_g23847	G|A	A|A	A|A	A|A	A|A	NA	NA	NA	A|A	A|A	A|A	NA	NA	NA	NA	NA	NA	NA
324	h1_chr15	10950783	G	A	downstream_gene_variant	MODIFIER	h1_chr15-_g23847	G|A	A|A	A|A	A|A	A|A	A|A	NA	NA	A|A	A|A	A|A	A|A	A|A	NA	NA	NA	NA	NA
325	h1_chr15	10950825	C	G	downstream_gene_variant	MODIFIER	h1_chr15-_g23847	C|G	G|G	G|G	G|G	G|G	NA	NA	NA	G|G	G|G	G|G	NA	NA	NA	NA	NA	NA	NA
326	h1_chr15	10950833	G	A	downstream_gene_variant	MODIFIER	h1_chr15-_g23847	G|A	A|A	A|A	A|A	A|A	NA	NA	NA	A|A	A|A	A|A	NA	NA	NA	NA	same	NA	NA
327	h1_chr15	10950857	G	GA	downstream_gene_variant	MODIFIER	h1_chr15-_g23847	G|GA	GA|GA	GA|GA	GA|GA	GA|GA	NA	GA|GA	GA|GA	GA|GA	GA|GA	GA|GA	NA	NA	GA|GA	NA	NA	NA	NA
328	h1_chr15	10950875	A	T	downstream_gene_variant	MODIFIER	h1_chr15-_g23847	A|T	T|T	T|T	T|T	T|T	NA	NA	NA	T|T	T|T	T|T	NA	NA	NA	NA	NA	NA	NA
329	h1_chr15	10950928	T	G	downstream_gene_variant	MODIFIER	h1_chr15-_g23847	T|G	G|G	G|G	G|G	G|G	G|G	NA	NA	G|G	G|G	G|G	G|G	G|G	NA	NA	NA	NA	NA
330	h1_chr15	10950931	A	G	downstream_gene_variant	MODIFIER	h1_chr15-_g23847	A|G	G|G	G|G	G|G	G|G	A|G	NA	NA	G|G	G|G	G|G	G|G	G|G	NA	NA	same	NA	NA
331	h1_chr15	10950952	T	C	downstream_gene_variant	MODIFIER	h1_chr15-_g23847	T|C	C|C	C|C	C|C	C|C	C|C	NA	NA	C|C	C|C	C|C	C|C	C|C	NA	NA	NA	NA	NA
332	h1_chr15	10951030	T	G	downstream_gene_variant	MODIFIER	h1_chr15-_g23847	T|G	G|G	G|G	G|G	G|G	T|G	NA	NA	G|G	G|G	G|G	G|G	G|G	NA	NA	same	NA	NA
333	h1_chr15	10951105	A	G	downstream_gene_variant	MODIFIER	h1_chr15-_g23847	A|G	G|G	G|G	G|G	G|G	G|G	NA	NA	G|G	G|G	G|G	G|G	G|G	NA	NA	NA	NA	NA
334	h1_chr15	10951180	C	T	downstream_gene_variant	MODIFIER	h1_chr15-_g23847	C|T	T|T	NA	NA	NA	NA	NA	NA	NA	NA	NA	NA	NA	NA	same	NA	NA	NA
335	h1_chr15	10951202	T	C	downstream_gene_variant	MODIFIER	h1_chr15-_g23847	T|C	C|C	C|C	C|C	C|C	T|C	NA	NA	C|C	C|C	C|C	C|C	C|C	NA	NA	same	NA	NA
336	h1_chr15	10951387	TTACTGTTCACGTAACACGTGTACAATGTTGG	T	downstream_gene_variant	MODIFIER	h1_chr15-_g23847	TTACTGTTCACGTAACACGTGTACAATGTTGG|T	T|T	T|T	T|T	T|T	NA	NA	NA	T|T	T|T	T|T	NA	NA	NA	NA	NA	NA	NA
337	h1_chr15	10951503	T	C	downstream_gene_variant	MODIFIER	h1_chr15-_g23847	T|C	C|C	C|C	C|C	C|C	NA	NA	NA	C|C	C|C	C|C	NA	NA	NA	NA	NA	NA	NA
338	h1_chr15	10951514	T	C	downstream_gene_variant	MODIFIER	h1_chr15-_g23847	T|C	C|C	C|C	C|C	C|C	T|C	NA	NA	C|C	C|C	C|C	C|C	C|C	NA	NA	same	NA	NA
339	h1_chr15	10951520	A	AT	downstream_gene_variant	MODIFIER	h1_chr15-_g23847	A|AT	AT|AT	AT|AT	AT|AT	AT|AT	NA	NA	NA	AT|AT	AT|AT	AT|AT	NA	NA	NA	NA	NA	NA	NA
340	h1_chr15	10951536	A	T	downstream_gene_variant	MODIFIER	h1_chr15-_g23847	A|T	T|T	T|T	T|T	T|T	NA	NA	NA	T|T	T|T	T|T	NA	NA	NA	NA	NA	NA	NA
341	h1_chr15	10951544	A	G	downstream_gene_variant	MODIFIER	h1_chr15-_g23847	A|G	G|G	G|G	G|G	G|G	G|G	NA	NA	G|G	G|G	G|G	G|G	G|G	NA	NA	NA	NA	NA
342	h1_chr15	10951898	G	GA	downstream_gene_variant	MODIFIER	h1_chr15-_g23847	G|GA	GA|GA	GA|GA	GA|GA	GA|GA	G|GA	NA	NA	GA|GA	GA|GA	G|GA	G|G	G|G	NA	NA	same	NA	NA
343	h1_chr15	10951926	AG	A	downstream_gene_variant	MODIFIER	h1_chr15-_g23847	AG|A	A|A	A|A	A|A	A|A	NA	NA	NA	A|A	A|A	AG|A	NA	NA	NA	NA	NA	NA	NA
344	h1_chr15	10951934	C	A	downstream_gene_variant	MODIFIER	h1_chr15-_g23847	C|A	A|A	A|A	A|A	A|A	NA	NA	NA	A|A	A|A	A|A	NA	NA	NA	NA	NA	NA	NA
345	h1_chr15	10951967	A	G	downstream_gene_variant	MODIFIER	h1_chr15-_g23847	A|G	G|G	G|G	G|G	G|G	G|G	NA	NA	G|G	G|G	G|G	G|G	G|G	NA	NA	NA	NA	NA
346	h1_chr15	10952026	T	G	downstream_gene_variant	MODIFIER	h1_chr15-_g23847	T|G	G|G	G|G	G|G	G|G	G|G	NA	NA	G|G	G|G	G|G	G|G	G|G	NA	NA	NA	NA	NA
347	h1_chr15	10952042	C	T	downstream_gene_variant	MODIFIER	h1_chr15-_g23847	C|T	T|T	T|T	T|T	T|T	NA	NA	NA	T|T	T|T	T|T	NA	NA	NA	NA	NA	NA	NA
348	h1_chr15	10952077	G	A	downstream_gene_variant	MODIFIER	h1_chr15-_g23847	G|A	A|A	A|A	A|A	A|A	NA	NA	NA	A|A	A|A	A|A	NA	NA	NA	NA	NA	NA	NA
349	h1_chr15	10952100	C	T	downstream_gene_variant	MODIFIER	h1_chr15-_g23847	C|T	T|T	T|T	T|T	T|T	NA	C|A	C|A	T|T	T|T	T|T	NA	NA	C|C	NA	same	same	NA
350	h1_chr15	10952125	T	C	downstream_gene_variant	MODIFIER	h1_chr15-_g23847	T|C	C|C	C|C	C|C	C|C	C|C	C|C	C|C	C|C	C|C	C|C	C|C	C|C	C|C	NA	NA	NA	NA
351	h1_chr15	10952131	T	C	downstream_gene_variant	MODIFIER	h1_chr15-_g23847	T|C	C|C	C|C	C|C	C|C	C|C	NA	NA	C|C	C|C	C|C	C|C	C|C	NA	NA	NA	NA	NA
352	h1_chr15	10952165	G	A	downstream_gene_variant	MODIFIER	h1_chr15-_g23847	G|A	A|A	A|A	A|A	A|A	NA	NA	NA	A|A	A|A	A|A	NA	NA	NA	NA	NA	NA	NA
353	h1_chr15	10952167	T	C	downstream_gene_variant	MODIFIER	h1_chr15-_g23847	T|C	C|C	C|C	C|C	C|C	C|C	NA	NA	C|C	C|C	C|C	T|C	C|C	NA	NA	NA	NA	NA
354	h1_chr15	10952199	A	C	downstream_gene_variant	MODIFIER	h1_chr15-_g23847	A|C	C|C	C|C	C|C	C|C	C|C	NA	NA	C|C	C|C	C|C	C|C	C|C	NA	NA	NA	NA	NA
355	h1_chr15	10952215	A	T	downstream_gene_variant	MODIFIER	h1_chr15-_g23847	A|T	T|T	T|T	T|T	T|T	A|G	A|G	A|G	T|T	T|T	T|T	G|G	G|G	G|G	NA	same	same	NA
356	h1_chr15	10952216	C	A	downstream_gene_variant	MODIFIER	h1_chr15-_g23847	C|A	A|A	A|A	A|A	A|A	NA	NA	NA	A|A	A|A	A|A	NA	NA	NA	NA	NA	NA	NA
357	h1_chr15	10952606	G	T	downstream_gene_variant	MODIFIER	h1_chr15-_g23847	G|T	T|T	T|T	T|T	T|T	NA	NA	NA	T|T	T|T	T|T	NA	NA	NA	NA	NA	NA	NA
358	h1_chr15	10952616	G	GT	downstream_gene_variant	MODIFIER	h1_chr15-_g23847	G|GT	GT|GT	GT|GT	GT|GT	GT|GT	GT|GT	NA	NA	GT|GT	GT|GT	GT|GT	GT|GT	GT|GT	NA	NA	NA	NA	NA
359	h1_chr15	10952634	G	A	downstream_gene_variant	MODIFIER	h1_chr15-_g23847	G|A	A|A	A|A	A|A	A|A	NA	NA	NA	A|A	A|A	A|A	NA	NA	NA	NA	NA	NA	NA
360	h1_chr15	10952684	G	A	downstream_gene_variant	MODIFIER	h1_chr15-_g23847	G|A	A|A	A|A	A|A	A|A	NA	NA	NA	A|A	A|A	A|A	NA	NA	NA	NA	NA	NA	NA
361	h1_chr15	10952749	A	G	downstream_gene_variant	MODIFIER	h1_chr15-_g23847	A|G	G|G	G|G	G|G	G|G	G|G	NA	NA	G|G	G|G	G|G	G|G	G|G	NA	NA	NA	NA	NA
362	h1_chr15	10952754	C	T	downstream_gene_variant	MODIFIER	h1_chr15-_g23847	C|T	T|T	T|T	T|T	T|T	C|G	NA	NA	T|T	T|T	T|T	C|C	C|C	NA	NA	same	NA	NA
363	h1_chr15	10952782	C	A	downstream_gene_variant	MODIFIER	h1_chr15-_g23847	C|A	A|A	A|A	A|A	A|A	NA	NA	NA	A|A	A|A	A|A	NA	NA	NA	NA	NA	NA	NA
364	h1_chr15	10952799	C	T	downstream_gene_variant	MODIFIER	h1_chr15-_g23847	C|T	T|T	T|T	T|T	T|T	NA	NA	NA	T|T	T|T	T|T	NA	NA	NA	NA	NA	NA	NA
365	h1_chr15	10952801	C	T	downstream_gene_variant	MODIFIER	h1_chr15-_g23847	C|T	T|T	T|T	T|T	T|T	T|T	NA	NA	T|T	T|T	T|T	T|T	T|T	NA	NA	NA	NA	NA
366	h1_chr15	10952809	T	C	downstream_gene_variant	MODIFIER	h1_chr15-_g23847	T|C	C|C	C|C	C|C	C|C	C|C	C|C	C|C	C|C	C|C	C|C	C|C	C|C	C|C	NA	NA	NA	NA
367	h1_chr15	10952832	G	A	downstream_gene_variant	MODIFIER	h1_chr15-_g23847	G|A	A|A	A|A	A|A	A|A	NA	NA	NA	A|A	A|A	A|A	NA	NA	NA	NA	NA	NA	NA
368	h1_chr15	10952901	A	C	downstream_gene_variant	MODIFIER	h1_chr15-_g23847	A|C	C|C	C|C	C|C	C|C	C|C	C|C	C|C	C|C	C|C	C|C	C|C	C|C	C|C	NA	NA	NA	NA
369	h1_chr15	10952916	G	A	downstream_gene_variant	MODIFIER	h1_chr15-_g23847	G|A	A|A	A|A	A|A	A|A	NA	NA	NA	A|A	A|A	A|A	NA	NA	NA	NA	NA	NA	NA
370	h1_chr15	10952922	C	A	downstream_gene_variant	MODIFIER	h1_chr15-_g23847	C|A	A|A	A|A	A|A	A|A	NA	NA	NA	A|A	A|A	A|A	NA	NA	NA	NA	NA	NA	NA
371	h1_chr15	10952960	C	T	downstream_gene_variant	MODIFIER	h1_chr15-_g23847	C|T	T|T	T|T	T|T	T|T	NA	NA	NA	T|T	T|T	T|T	NA	NA	NA	NA	NA	NA	NA
372	h1_chr15	10953040	A	G	downstream_gene_variant	MODIFIER	h1_chr15-_g23847	A|G	G|G	G|G	G|G	G|G	G|G	NA	NA	G|G	G|G	G|G	G|G	G|G	NA	NA	NA	NA	NA
373	h1_chr15	10953054	A	T	downstream_gene_variant	MODIFIER	h1_chr15-_g23847	A|T	T|T	T|T	T|T	T|T	T|T	NA	NA	T|T	T|T	T|T	T|T	T|T	NA	NA	NA	NA	NA
374	h1_chr15	10953089	C	T	downstream_gene_variant	MODIFIER	h1_chr15-_g23847	C|T	T|T	T|T	T|T	T|T	NA	NA	NA	T|T	T|T	T|T	NA	NA	NA	NA	NA	NA	NA
375	h1_chr15	10953105	G	A	downstream_gene_variant	MODIFIER	h1_chr15-_g23847	G|A	A|A	A|A	A|A	A|A	G|G	NA	NA	A|A	A|A	A|A	A|A	A|A	NA	NA	same	NA	NA
376	h1_chr15	10953155	A	G	downstream_gene_variant	MODIFIER	h1_chr15-_g23847	A|G	G|G	G|G	G|G	G|G	.|.	NA	NA	G|G	G|G	G|G	G|G	G|G	NA	NA	NA	NA	NA
377	h1_chr15	10953158	G	A	downstream_gene_variant	MODIFIER	h1_chr15-_g23847	G|A	A|A	A|A	A|A	A|A	NA	NA	NA	A|A	A|A	A|A	NA	NA	NA	NA	NA	NA	NA
378	h1_chr15	10953204	A	G	downstream_gene_variant	MODIFIER	h1_chr15-_g23847	A|G	G|G	G|G	G|G	G|G	.|.	NA	NA	G|G	G|G	G|G	G|G	G|G	NA	NA	NA	NA	NA
379	h1_chr15	10953210	A	C	downstream_gene_variant	MODIFIER	h1_chr15-_g23847	A|C	C|C	NA	NA	NA	.|.	NA	NA	NA	NA	NA	T|T	T|T	NA	same	NA	NA	NA
380	h1_chr15	10953243	C	T	downstream_gene_variant	MODIFIER	h1_chr15-_g23847	C|T	T|T	T|T	T|T	T|T	NA	NA	NA	T|T	T|T	T|T	NA	NA	NA	NA	NA	NA	NA
381	h1_chr15	10953415	T	C	downstream_gene_variant	MODIFIER	h1_chr15-_g23847	T|C	C|C	C|C	C|C	C|C	T|T	C|C	C|C	C|C	C|C	C|C	C|C	C|C	C|C	NA	same	NA	NA
382	h1_chr15	10953422	T	C	downstream_gene_variant	MODIFIER	h1_chr15-_g23847	T|C	C|C	C|C	C|C	C|C	T|T	NA	NA	C|C	C|C	C|C	C|C	C|C	NA	NA	same	NA	NA
383	h1_chr15	10953464	G	T	downstream_gene_variant	MODIFIER	h1_chr15-_g23847	G|T	T|T	T|T	T|T	T|T	G|G	NA	NA	T|T	T|T	T|T	C|C	C|C	NA	NA	same	NA	NA
384	h1_chr15	10953520	G	A	downstream_gene_variant	MODIFIER	h1_chr15-_g23847	G|A	A|A	A|A	A|A	A|A	A|A	NA	NA	A|A	A|A	A|A	A|A	A|A	NA	NA	NA	NA	NA
385	h1_chr15	10953595	A	G	downstream_gene_variant	MODIFIER	h1_chr15-_g23847	A|G	G|G	G|G	G|G	G|G	G|G	NA	NA	G|G	G|G	G|G	G|G	G|G	NA	NA	NA	NA	NA
386	h1_chr15	10953646	T	G	downstream_gene_variant	MODIFIER	h1_chr15-_g23847	T|G	G|G	G|G	G|G	G|G	G|G	NA	NA	G|G	G|G	G|G	G|G	G|G	NA	NA	NA	NA	NA
387	h1_chr15	10953658	T	G	downstream_gene_variant	MODIFIER	h1_chr15-_g23847	T|G	G|G	NA	NA	NA	G|G	NA	NA	NA	NA	NA	G|G	G|G	NA	NA	NA	NA	NA
388	h1_chr15	10953671	T	C	downstream_gene_variant	MODIFIER	h1_chr15-_g23847	T|C	C|C	T|C	C|C	T|C	C|C	NA	NA	C|C	C|C	C|C	C|C	C|C	NA	NA	NA	NA	NA
389	h1_chr15	10953696	T	C	downstream_gene_variant	MODIFIER	h1_chr15-_g23847	T|C	C|C	C|C	C|C	C|C	NA	NA	NA	C|C	C|C	C|C	NA	NA	NA	NA	NA	NA	NA
390	h1_chr15	10953720	A	T	downstream_gene_variant	MODIFIER	h1_chr15-_g23847	A|T	T|T	T|T	T|T	T|T	T|T	NA	NA	T|T	T|T	T|T	T|T	T|T	NA	NA	NA	NA	NA
391	h1_chr15	10953727	T	A	downstream_gene_variant	MODIFIER	h1_chr15-_g23847	T|A	A|A	A|A	A|A	A|A	NA	NA	NA	A|A	A|A	A|A	NA	NA	NA	NA	NA	NA	NA
392	h1_chr15	10953777	G	T	downstream_gene_variant	MODIFIER	h1_chr15-_g23847	G|T	T|T	T|T	T|T	T|T	NA	NA	NA	T|T	T|T	T|T	NA	NA	NA	NA	NA	NA	NA
393	h1_chr15	10953783	C	T	downstream_gene_variant	MODIFIER	h1_chr15-_g23847	C|T	T|T	T|T	T|T	T|T	NA	NA	NA	T|T	T|T	T|T	NA	NA	NA	NA	NA	NA	NA
394	h1_chr15	10953850	TA	T	downstream_gene_variant	MODIFIER	h1_chr15-_g23847	TA|T	T|T	T|T	T|T	T|T	T|T	NA	NA	T|T	T|T	T|T	T|T	T|T	NA	NA	NA	NA	NA
395	h1_chr15	10953878	C	T	downstream_gene_variant	MODIFIER	h1_chr15-_g23847	C|T	T|T	T|T	T|T	T|T	T|T	NA	NA	T|T	T|T	T|T	T|T	T|T	NA	NA	NA	NA	NA
396	h1_chr15	10954059	T	C	downstream_gene_variant	MODIFIER	h1_chr15-_g23847	T|C	C|C	C|C	C|C	T|C	NA	NA	NA	C|C	C|C	C|C	NA	NA	NA	NA	NA	NA	NA
397	h1_chr15	10954082	A	G	downstream_gene_variant	MODIFIER	h1_chr15-_g23847	A|G	G|G	G|G	G|G	G|G	A|G	NA	NA	G|G	G|G	G|G	G|G	G|G	NA	NA	same	NA	NA
398	h1_chr15	10954143	T	G	downstream_gene_variant	MODIFIER	h1_chr15-_g23847	T|G	G|G	G|G	G|G	G|G	NA	NA	NA	G|G	G|G	G|G	NA	NA	NA	NA	NA	NA	NA
399	h1_chr15	10954179	AT	A	downstream_gene_variant	MODIFIER	h1_chr15-_g23847	AT|A	A|A	A|A	A|A	A|A	NA	A|A	A|A	A|A	A|A	A|A	NA	NA	A|AT	NA	NA	NA	NA
400	h1_chr15	10954209	G	C	downstream_gene_variant	MODIFIER	h1_chr15-_g23847	G|C	C|C	C|C	C|C	C|C	NA	G|T	G|T	C|C	C|C	C|C	NA	NA	G|T	NA	NA	NA	NA
401	h1_chr15	10954230	C	T	downstream_gene_variant	MODIFIER	h1_chr15-_g23847	C|T	T|T	T|T	T|T	T|T	T|T	C|T	C|T	T|T	T|T	T|T	T|T	T|T	C|T	NA	NA	NA	NA
402	h1_chr15	10954304	C	T	downstream_gene_variant	MODIFIER	h1_chr15-_g23847	C|T	T|T	T|T	T|T	T|T	T|T	T|T	T|T	T|T	T|T	T|T	T|T	T|T	T|T	NA	NA	NA	NA
403	h1_chr15	10954524	T	A	downstream_gene_variant	MODIFIER	h1_chr15-_g23847	T|A	A|A	A|A	A|A	A|A	NA	NA	NA	A|A	A|A	A|A	NA	NA	NA	NA	NA	NA	NA
404	h1_chr15	10954590	G	A	downstream_gene_variant	MODIFIER	h1_chr15-_g23847	G|A	A|A	A|A	A|A	A|A	NA	NA	NA	A|A	A|A	A|A	NA	NA	NA	NA	NA	NA	NA
405	h1_chr15	10954646	C	T	downstream_gene_variant	MODIFIER	h1_chr15-_g23847	C|T	T|T	T|T	T|T	T|T	NA	NA	NA	T|T	T|T	T|T	NA	NA	NA	NA	NA	NA	NA
406	h1_chr15	10954719	C	A	downstream_gene_variant	MODIFIER	h1_chr15-_g23847	C|A	A|A	A|A	A|A	A|A	NA	NA	NA	A|A	A|A	A|A	NA	NA	NA	NA	NA	NA	NA
407	h1_chr15	10954758	G	T	downstream_gene_variant	MODIFIER	h1_chr15-_g23847	G|T	T|T	T|T	T|T	T|T	G|T	NA	NA	T|T	T|T	T|T	G|G	G|G	NA	NA	same	NA	NA
408	h1_chr15	10954787	G	A	downstream_gene_variant	MODIFIER	h1_chr15-_g23847	G|A	A|A	A|A	A|A	A|A	A|A	NA	NA	A|A	A|A	A|A	A|A	A|A	NA	NA	NA	NA	NA
409	h1_chr15	10954797	C	G	downstream_gene_variant	MODIFIER	h1_chr15-_g23847	C|G	G|G	G|G	G|G	G|G	G|G	G|G	G|G	G|G	G|G	G|G	G|G	G|G	G|G	NA	NA	NA	NA
410	h1_chr15	10954834	A	C	downstream_gene_variant	MODIFIER	h1_chr15-_g23847	A|C	C|C	C|C	C|C	C|C	C|C	NA	NA	C|C	C|C	C|C	C|C	C|C	NA	NA	NA	NA	NA
411	h1_chr15	10954885	T	C	downstream_gene_variant	MODIFIER	h1_chr15-_g23847	T|C	C|C	C|C	C|C	C|C	C|C	NA	NA	C|C	C|C	C|C	C|C	C|C	NA	NA	NA	NA	NA
412	h1_chr15	10954982	A	G	downstream_gene_variant	MODIFIER	h1_chr15-_g23847	A|G	G|G	G|G	G|G	G|G	A|G	NA	NA	G|G	G|G	G|G	A|G	G|G	NA	NA	NA	NA	NA
413	h1_chr15	10955014	A	T	downstream_gene_variant	MODIFIER	h1_chr15-_g23847	A|T	T|T	T|T	T|T	T|T	T|T	NA	NA	T|T	T|T	T|T	T|T	T|T	NA	NA	NA	NA	NA
414	h1_chr15	10955124	T	C	downstream_gene_variant	MODIFIER	h1_chr15-_g23847	T|C	C|C	C|C	C|C	C|C	NA	NA	NA	C|C	C|C	C|C	NA	NA	NA	NA	NA	NA	NA
415	h1_chr15	10955138	G	A	downstream_gene_variant	MODIFIER	h1_chr15-_g23847	G|A	A|A	A|A	A|A	A|A	G|A	NA	NA	A|A	A|A	A|A	G|G	G|G	NA	NA	same	NA	NA
416	h1_chr15	10955158	A	G	downstream_gene_variant	MODIFIER	h1_chr15-_g23847	A|G	G|G	G|G	G|G	G|G	NA	NA	NA	G|G	G|G	G|G	NA	NA	NA	NA	NA	NA	NA
417	h1_chr15	10955166	C	A	downstream_gene_variant	MODIFIER	h1_chr15-_g23847	C|A	A|A	A|A	A|A	A|A	NA	NA	NA	A|A	A|A	A|A	NA	NA	NA	NA	same	NA	NA
418	h1_chr15	10956011	AT	A	frameshift_variant	HIGH	h1_chr15-_g23848	AT|A	A|A	A|A	A|A	A|A	NA	NA	NA	A|A	A|A	A|A	NA	NA	NA	NA	NA	NA	NA
419	h1_chr15	10956077	A	G	upstream_gene_variant	MODIFIER	h1_chr15-_g23847	A|G	G|G	G|G	G|G	G|G	NA	NA	NA	G|G	G|G	G|G	NA	NA	NA	NA	NA	NA	NA
420	h1_chr15	10956088	A	G	upstream_gene_variant	MODIFIER	h1_chr15-_g23847	A|G	G|G	G|G	G|G	G|G	G|G	NA	NA	G|G	G|G	G|G	G|G	G|G	NA	NA	NA	NA	NA
421	h1_chr15	10956137	G	A	upstream_gene_variant	MODIFIER	h1_chr15-_g23847	G|A	A|A	A|A	A|A	A|A	NA	NA	NA	A|A	A|A	A|A	NA	NA	NA	NA	NA	NA	NA
422	h1_chr15	10956143	G	A	upstream_gene_variant	MODIFIER	h1_chr15-_g23847	G|A	A|A	A|A	A|A	A|A	NA	NA	NA	A|A	A|A	A|A	NA	NA	NA	NA	NA	NA	NA
423	h1_chr15	10956156	TAA	T	upstream_gene_variant	MODIFIER	h1_chr15-_g23847	TAA|T	T|T	T|T	T|T	T|T	NA	NA	NA	T|T	T|T	T|T	NA	NA	NA	NA	NA	NA	NA
424	h1_chr15	10956168	A	G	upstream_gene_variant	MODIFIER	h1_chr15-_g23847	A|G	G|G	G|G	G|G	G|G	G|G	NA	NA	G|G	G|G	G|G	G|G	G|G	NA	NA	NA	NA	NA
425	h1_chr15	10956169	T	C	upstream_gene_variant	MODIFIER	h1_chr15-_g23847	T|C	C|C	C|C	C|C	C|C	C|C	NA	NA	C|C	C|C	C|C	C|C	C|C	NA	NA	NA	NA	NA
426	h1_chr15	10956172	T	C	upstream_gene_variant	MODIFIER	h1_chr15-_g23847	T|C	C|C	C|C	C|C	C|C	NA	NA	NA	C|C	C|C	C|C	NA	NA	NA	NA	NA	NA	NA
427	h1_chr15	10956186	T	C	upstream_gene_variant	MODIFIER	h1_chr15-_g23847	T|C	C|C	C|C	C|C	C|C	C|C	NA	NA	C|C	C|C	C|C	C|C	C|C	NA	NA	NA	NA	NA
428	h1_chr15	10956206	G	A	upstream_gene_variant	MODIFIER	h1_chr15-_g23847	G|A	A|A	A|A	A|A	A|A	NA	NA	NA	A|A	A|A	A|A	NA	NA	NA	NA	NA	NA	NA
429	h1_chr15	10956209	A	G	upstream_gene_variant	MODIFIER	h1_chr15-_g23847	A|G	G|G	G|G	G|G	G|G	G|G	NA	NA	G|G	G|G	G|G	G|G	G|G	NA	NA	NA	NA	NA
430	h1_chr15	10956239	T	C	upstream_gene_variant	MODIFIER	h1_chr15-_g23847	T|C	C|C	C|C	C|C	C|C	C|C	NA	NA	C|C	C|C	C|C	C|C	C|C	NA	NA	NA	NA	NA
431	h1_chr15	10956300	C	T	upstream_gene_variant	MODIFIER	h1_chr15-_g23847	C|T	T|T	T|T	T|T	T|T	NA	NA	NA	T|T	T|T	T|T	NA	NA	NA	NA	NA	NA	NA
432	h1_chr15	10956350	C	T	upstream_gene_variant	MODIFIER	h1_chr15-_g23847	C|T	T|T	T|T	T|T	T|T	NA	NA	NA	T|T	T|T	T|T	NA	NA	NA	NA	NA	NA	NA
433	h1_chr15	10956409	A	G	upstream_gene_variant	MODIFIER	h1_chr15-_g23847	A|G	G|G	G|G	G|G	G|G	NA	NA	NA	G|G	G|G	G|G	NA	NA	NA	NA	NA	NA	NA
434	h1_chr15	10956410	G	A	upstream_gene_variant	MODIFIER	h1_chr15-_g23847	G|A	A|A	A|A	A|A	A|A	NA	NA	NA	A|A	A|A	A|A	NA	NA	NA	NA	NA	NA	NA
435	h1_chr15	10956493	G	T	upstream_gene_variant	MODIFIER	h1_chr15-_g23847	G|T	T|T	T|T	T|T	T|T	NA	NA	NA	T|T	T|T	T|T	NA	NA	NA	NA	NA	NA	NA
436	h1_chr15	10956656	G	A	upstream_gene_variant	MODIFIER	h1_chr15-_g23847	G|A	A|A	A|A	A|A	A|A	NA	NA	NA	A|A	A|A	A|A	NA	NA	NA	NA	NA	NA	NA
437	h1_chr15	10956731	A	T	upstream_gene_variant	MODIFIER	h1_chr15-_g23847	A|T	T|T	T|T	T|T	T|T	T|T	NA	NA	T|T	T|T	T|T	T|T	T|T	NA	NA	NA	NA	NA
438	h1_chr15	11002752	T	C	intergenic_region	MODIFIER	h1_chr15-_g23848-h1_chr15+_g23849	T|C	C|C	NA	NA	NA	T|C	NA	NA	NA	NA	NA	T|T	T|T	NA	NA	same	NA	NA
439	h1_chr15	11057822	A	T	intergenic_region	MODIFIER	h1_chr15-_g23851-h1_chr15-_g23852	A|T	T|T	T|T	T|T	T|T	NA	NA	NA	T|T	T|T	T|T	NA	NA	NA	NA	NA	NA	NA
440	h1_chr15	11058677	G	T	intergenic_region	MODIFIER	h1_chr15-_g23851-h1_chr15-_g23852	G|T	T|T	T|T	T|T	T|T	T|T	G|T	T|T	T|T	T|T	T|T	T|T	T|T	T|T	NA	NA	NA	NA
441	h1_chr15	11059021	T	C	intergenic_region	MODIFIER	h1_chr15-_g23851-h1_chr15-_g23852	T|C	C|C	C|C	C|C	C|C	C|C	T|C	C|C	C|C	C|C	C|C	C|C	C|C	C|C	NA	NA	NA	NA
442	h1_chr15	11059024	A	G	intergenic_region	MODIFIER	h1_chr15-_g23851-h1_chr15-_g23852	A|G	G|G	G|G	G|G	G|G	G|G	G|G	G|G	G|G	G|G	G|G	G|G	G|G	G|G	NA	NA	NA	NA
443	h1_chr15	11059180	T	C	intergenic_region	MODIFIER	h1_chr15-_g23851-h1_chr15-_g23852	T|C	C|C	C|C	C|C	C|C	C|C	T|C	T|C	C|C	C|C	C|C	C|C	C|C	C|C	NA	NA	same	NA
444	h1_chr15	11059319	A	G	intergenic_region	MODIFIER	h1_chr15-_g23851-h1_chr15-_g23852	A|G	G|G	G|G	G|G	G|G	G|G	A|G	A|G	G|G	G|G	G|G	G|G	G|G	G|G	NA	NA	same	NA
445	h1_chr15	11059354	T	C	intergenic_region	MODIFIER	h1_chr15-_g23851-h1_chr15-_g23852	T|C	C|C	C|C	C|C	C|C	C|C	T|C	T|C	C|C	C|C	C|C	C|C	C|C	C|C	NA	NA	same	NA
446	h1_chr15	11059721	T	C	intergenic_region	MODIFIER	h1_chr15-_g23851-h1_chr15-_g23852	T|C	C|C	C|C	T|C	T|T	NA	NA	NA	T|C	T|C	C|C	NA	NA	NA	NA	NA	NA	NA
447	h1_chr15	11059814	T	C	intergenic_region	MODIFIER	h1_chr15-_g23851-h1_chr15-_g23852	T|C	C|C	C|C	C|C	C|C	C|C	T|C	T|C	C|C	C|C	C|C	.|.	C|C	C|C	NA	NA	same	NA
448	h1_chr15	11059842	G	A	intergenic_region	MODIFIER	h1_chr15-_g23851-h1_chr15-_g23852	G|A	A|A	A|A	A|A	A|A	A|A	A|A	A|A	A|A	A|A	.|.	.|.	A|A	A|A	NA	NA	NA	NA
449	h1_chr15	11060129	A	T	intergenic_region	MODIFIER	h1_chr15-_g23851-h1_chr15-_g23852	A|T	T|T	T|T	T|T	T|T	T|T	T|T	T|T	T|T	T|T	T|T	T|T	T|T	T|T	NA	NA	NA	NA
450	h1_chr15	11060241	A	G	intergenic_region	MODIFIER	h1_chr15-_g23851-h1_chr15-_g23852	A|G	G|G	G|G	G|G	G|G	G|G	G|G	G|G	G|G	G|G	G|G	G|G	G|G	G|G	NA	NA	NA	NA
451	h1_chr15	11060521	A	G	intergenic_region	MODIFIER	h1_chr15-_g23851-h1_chr15-_g23852	A|G	G|G	G|G	G|G	G|G	G|G	G|G	A|G	G|G	G|G	G|G	G|G	G|G	A|G	NA	NA	NA	NA
452	h1_chr15	11060908	G	T	intergenic_region	MODIFIER	h1_chr15-_g23851-h1_chr15-_g23852	G|T	T|T	T|T	T|T	T|T	T|T	G|T	G|T	T|T	T|T	T|T	T|T	T|T	T|T	NA	NA	same	NA
453	h1_chr15	11061225	T	C	intergenic_region	MODIFIER	h1_chr15-_g23851-h1_chr15-_g23852	T|C	C|C	C|C	C|C	C|C	C|C	C|C	C|C	C|C	C|C	C|C	C|C	C|C	C|C	NA	NA	NA	NA
454	h1_chr15	11061340	T	C	intergenic_region	MODIFIER	h1_chr15-_g23851-h1_chr15-_g23852	T|C	C|C	C|C	C|C	C|C	C|C	T|C	T|C	C|C	C|C	C|C	C|C	C|C	C|C	NA	NA	same	NA
455	h1_chr15	11061451	T	G	intergenic_region	MODIFIER	h1_chr15-_g23851-h1_chr15-_g23852	T|G	G|G	G|G	G|G	G|G	G|G	G|G	G|G	G|G	G|G	G|G	G|G	G|G	G|G	NA	NA	NA	NA
456	h1_chr15	11061649	A	C	intergenic_region	MODIFIER	h1_chr15-_g23851-h1_chr15-_g23852	A|C	C|C	C|C	C|C	C|C	C|C	C|C	C|C	C|C	C|C	A|C	C|C	C|C	C|C	NA	NA	NA	NA
457	h1_chr15	11062198	T	C	intergenic_region	MODIFIER	h1_chr15-_g23851-h1_chr15-_g23852	T|C	C|C	C|C	C|C	C|C	C|C	C|C	C|C	C|C	C|C	C|C	C|C	C|C	C|C	NA	NA	NA	NA
458	h1_chr15	11062208	A	G	intergenic_region	MODIFIER	h1_chr15-_g23851-h1_chr15-_g23852	A|G	G|G	G|G	G|G	G|G	G|G	G|G	G|G	G|G	G|G	G|G	G|G	G|G	G|G	NA	NA	NA	NA
459	h1_chr15	11077109	A	G	upstream_gene_variant	MODIFIER	h1_chr15-_g23852	A|G	G|G	A|G	A|G	A|G	A|G	NA	NA	G|G	G|G	G|G	G|G	G|G	NA	same	same	NA	NA
460	h1_chr15	11077147	G	T	upstream_gene_variant	MODIFIER	h1_chr15-_g23852	G|T	T|T	G|T	G|T	G|T	G|T	NA	NA	T|T	T|T	T|T	T|T	T|T	NA	same	same	NA	NA
461	h1_chr15	11077267	T	G	upstream_gene_variant	MODIFIER	h1_chr15-_g23852	T|G	G|G	T|G	T|G	T|G	T|G	NA	NA	G|G	G|G	G|G	G|G	G|G	NA	same	same	NA	NA
462	h1_chr15	11077358	C	T	upstream_gene_variant	MODIFIER	h1_chr15-_g23852	C|T	T|T	C|T	C|T	C|T	C|T	NA	NA	T|T	T|T	T|T	T|T	T|T	NA	same	same	NA	NA
463	h1_chr15	11077640	G	T	upstream_gene_variant	MODIFIER	h1_chr15-_g23852	G|T	T|T	G|T	G|T	G|T	NA	A|A	A|A	T|T	T|T	T|T	NA	NA	.|.	same	NA	NA	NA
464	h1_chr15	11077649	A	G	upstream_gene_variant	MODIFIER	h1_chr15-_g23852	A|G	G|G	A|G	A|G	A|G	NA	NA	NA	G|G	G|G	G|G	NA	NA	NA	same	NA	NA	NA
465	h1_chr15	11077667	A	G	upstream_gene_variant	MODIFIER	h1_chr15-_g23852	A|G	G|G	NA	NA	NA	NA	NA	NA	NA	NA	NA	NA	NA	NA	same	NA	NA	NA
466	h1_chr15	11077680	G	A	upstream_gene_variant	MODIFIER	h1_chr15-_g23852	G|A	A|A	G|A	G|A	G|A	NA	NA	NA	A|A	A|A	A|A	NA	NA	NA	same	NA	NA	NA
467	h1_chr15	11077748	T	G	upstream_gene_variant	MODIFIER	h1_chr15-_g23852	T|G	G|G	T|G	T|G	T|G	NA	NA	NA	G|G	G|G	G|G	NA	NA	NA	same	NA	NA	NA
468	h1_chr15	11077783	T	C	upstream_gene_variant	MODIFIER	h1_chr15-_g23852	T|C	C|C	C|C	C|C	C|C	C|C	NA	NA	C|C	C|C	C|C	.|.	T|T	NA	NA	NA	NA	NA
469	h1_chr15	11077807	A	G	upstream_gene_variant	MODIFIER	h1_chr15-_g23852	A|G	G|G	A|G	A|G	A|G	NA	NA	NA	G|G	G|G	G|G	NA	NA	NA	same	NA	NA	NA
470	h1_chr15	11077953	T	C	upstream_gene_variant	MODIFIER	h1_chr15-_g23852	T|C	C|C	T|C	T|C	T|C	NA	NA	NA	C|C	C|C	C|C	NA	NA	NA	same	same	NA	NA
471	h1_chr15	11079070	C	T	upstream_gene_variant	MODIFIER	h1_chr15-_g23852	C|T	T|T	C|T	C|T	C|T	C|T	NA	NA	T|T	T|T	T|T	T|T	T|T	NA	same	same	NA	NA
472	h1_chr15	11079074	T	C	upstream_gene_variant	MODIFIER	h1_chr15-_g23852	T|C	C|C	T|C	T|C	T|C	T|C	NA	NA	C|C	C|C	C|C	C|C	C|C	NA	same	same	NA	NA
473	h1_chr15	11079075	G	C	upstream_gene_variant	MODIFIER	h1_chr15-_g23852	G|C	C|C	G|C	G|C	G|C	G|C	NA	NA	C|C	C|C	C|C	C|C	C|C	NA	same	same	NA	NA
474	h1_chr15	11079436	C	T	downstream_gene_variant	MODIFIER	h1_chr15-_g23853	C|T	T|T	T|T	T|T	T|T	T|T	T|T	T|T	T|T	T|T	T|T	T|T	T|T	.|.	NA	NA	NA	NA
475	h1_chr15	11079449	A	G	downstream_gene_variant	MODIFIER	h1_chr15-_g23853	A|G	G|G	A|G	A|G	A|G	A|G	NA	NA	G|G	G|G	G|G	G|G	G|G	NA	same	same	NA	NA
476	h1_chr15	11079497	A	T	downstream_gene_variant	MODIFIER	h1_chr15-_g23853	A|T	T|T	T|T	T|T	T|T	A|T	NA	NA	T|T	T|T	T|T	T|T	T|T	NA	NA	same	NA	NA
477	h1_chr15	11079595	T	C	downstream_gene_variant	MODIFIER	h1_chr15-_g23853	T|C	C|C	T|C	T|C	T|C	T|C	NA	NA	C|C	C|C	C|C	C|C	C|C	NA	same	same	NA	NA
478	h1_chr15	11079650	G	T	downstream_gene_variant	MODIFIER	h1_chr15-_g23853	G|T	T|T	G|T	G|T	G|T	G|T	NA	NA	T|T	T|T	T|T	T|T	T|T	NA	same	same	NA	NA
479	h1_chr15	11079679	T	A	downstream_gene_variant	MODIFIER	h1_chr15-_g23853	T|A	A|A	T|A	T|A	T|A	T|A	NA	NA	A|A	A|A	A|A	A|A	A|A	NA	same	same	NA	NA
480	h1_chr15	11079696	T	G	downstream_gene_variant	MODIFIER	h1_chr15-_g23853	T|G	G|G	T|G	T|G	T|G	T|G	NA	NA	G|G	G|G	G|G	G|G	G|G	NA	same	same	NA	NA
481	h1_chr15	11079794	C	A	downstream_gene_variant	MODIFIER	h1_chr15-_g23853	C|A	A|A	C|A	C|A	C|A	C|A	NA	NA	A|A	A|A	A|A	A|A	A|A	NA	same	same	NA	NA
482	h1_chr15	11080054	T	C	downstream_gene_variant	MODIFIER	h1_chr15-_g23853	T|C	C|C	C|C	C|C	C|C	C|C	T|C	T|C	C|C	C|C	C|C	C|C	C|C	C|C	NA	NA	same	NA
483	h1_chr15	11080057	T	G	downstream_gene_variant	MODIFIER	h1_chr15-_g23853	T|G	G|G	T|G	T|G	T|G	T|G	T|G	T|G	G|G	G|G	G|G	G|G	G|G	G|G	same	same	same	same
484	h1_chr15	11080079	G	GT	downstream_gene_variant	MODIFIER	h1_chr15-_g23853	G|GT	GT|GT	GT|GT	GT|GT	GT|GT	GT|GT	GT|GT	GT|GT	GT|GT	GT|GT	GT|GT	GT|GT	GT|GT	GT|GT	NA	NA	NA	NA
485	h1_chr15	11080336	C	A	downstream_gene_variant	MODIFIER	h1_chr15-_g23853	C|A	A|A	C|A	C|A	C|A	C|A	C|A	C|A	A|A	A|A	A|A	A|A	A|A	A|A	same	same	same	same
486	h1_chr15	11082401	G	A	downstream_gene_variant	MODIFIER	h1_chr15-_g23853	G|A	A|A	G|A	G|A	G|A	G|A	G|A	G|A	A|A	A|A	A|A	A|A	A|A	A|A	same	same	same	same
487	h1_chr15	11082637	G	A	downstream_gene_variant	MODIFIER	h1_chr15-_g23853	G|A	A|A	A|A	A|A	A|A	NA	NA	NA	A|A	A|A	A|A	NA	NA	NA	NA	same	same	NA
488	h1_chr15	11083056	G	A	intron_variant	MODIFIER	h1_chr15-_g23853	G|A	A|A	A|A	A|A	A|A	G|A	NA	NA	A|A	A|A	A|A	A|A	A|A	NA	NA	same	NA	NA
489	h1_chr15	11083190	G	A	intron_variant	MODIFIER	h1_chr15-_g23853	G|A	A|A	A|A	A|A	A|A	NA	NA	NA	A|A	A|A	A|A	NA	NA	NA	NA	NA	NA	NA
490	h1_chr15	11083240	T	A	intron_variant	MODIFIER	h1_chr15-_g23853	T|A	A|A	A|A	A|A	A|A	NA	T|C	T|C	A|A	A|A	A|A	NA	NA	T|T	NA	NA	same	NA
491	h1_chr15	11083244	C	T	intron_variant	MODIFIER	h1_chr15-_g23853	C|T	T|T	T|T	T|T	T|T	NA	NA	NA	T|T	T|T	T|T	NA	NA	NA	NA	NA	NA	NA
492	h1_chr15	11083815	T	C	missense_variant	MODERATE	h1_chr15-_g23853	T|C	C|C	C|C	C|C	C|C	NA	NA	NA	C|C	C|C	C|C	NA	NA	NA	NA	NA	NA	NA
493	h1_chr15	11084313	G	A	synonymous_variant	LOW	h1_chr15-_g23853	G|A	A|A	A|A	A|A	A|A	A|A	A|A	A|A	A|A	A|A	A|A	A|A	A|A	A|A	NA	NA	NA	NA
494	h1_chr15	11084336	T	C	missense_variant	MODERATE	h1_chr15-_g23853	T|C	C|C	C|C	C|C	C|C	NA	T|C	T|C	C|C	C|C	C|C	NA	NA	T|T	NA	NA	same	NA
495	h1_chr15	11084356	T	G	missense_variant	MODERATE	h1_chr15-_g23853	T|G	G|G	G|G	G|G	G|G	NA	T|G	T|G	G|G	G|G	G|G	NA	NA	T|T	NA	NA	same	NA
496	h1_chr15	11084374	G	A	missense_variant	MODERATE	h1_chr15-_g23853	G|A	A|A	A|A	A|A	A|A	A|A	A|A	A|A	A|A	A|A	A|A	A|A	A|A	A|A	NA	NA	NA	NA
497	h1_chr15	11084401	AAAT	A	upstream_gene_variant	MODIFIER	h1_chr15-_g23853	AAAT|A	A|A	A|A	A|A	A|A	AAAT|A	AAAT|A	AAAT|A	A|A	A|A	A|A	AAAT|AAAT	AAAT|AAAT	AAAT|AAAT	NA	same	same	NA
498	h1_chr15	11084412	A	T	upstream_gene_variant	MODIFIER	h1_chr15-_g23853	A|T	T|T	T|T	T|T	T|T	NA	A|T	A|T	T|T	T|T	T|T	NA	NA	A|A	NA	same	same	NA
499	h1_chr15	11084499	CTTAA	C	upstream_gene_variant	MODIFIER	h1_chr15-_g23853	CTTAA|C	C|C	C|C	C|C	C|C	NA	CTTAA|C	CTTAA|C	C|C	C|C	C|C	NA	NA	CTTAA|CTTAA	NA	NA	same	NA
500	h1_chr15	11084565	C	G	upstream_gene_variant	MODIFIER	h1_chr15-_g23853	C|G	G|G	G|G	G|G	G|G	G|G	G|G	G|G	G|G	G|G	G|G	G|G	G|G	G|G	NA	NA	NA	NA
501	h1_chr15	11084653	A	T	upstream_gene_variant	MODIFIER	h1_chr15-_g23853	A|T	T|T	T|T	T|T	T|T	A|T	NA	NA	T|T	T|T	T|T	A|A	A|A	NA	NA	same	NA	NA
502	h1_chr15	11084834	C	A	upstream_gene_variant	MODIFIER	h1_chr15-_g23853	C|A	A|A	A|A	A|A	A|A	A|A	A|A	A|A	A|A	A|A	A|A	A|A	A|A	A|A	NA	NA	NA	NA
503	h1_chr15	11084908	C	T	upstream_gene_variant	MODIFIER	h1_chr15-_g23853	C|T	T|T	T|T	T|T	T|T	NA	C|T	C|T	T|T	T|T	T|T	NA	NA	C|C	NA	NA	same	NA
504	h1_chr15	11086006	T	C	upstream_gene_variant	MODIFIER	h1_chr15-_g23853	T|C	C|C	C|C	C|C	C|C	NA	NA	NA	C|C	C|C	C|C	NA	NA	NA	NA	NA	NA	NA
505	h1_chr15	11086007	G	A	upstream_gene_variant	MODIFIER	h1_chr15-_g23853	G|A	A|A	A|A	A|A	A|A	NA	NA	NA	A|A	A|A	A|A	NA	NA	NA	NA	NA	NA	NA
506	h1_chr15	11086034	C	T	upstream_gene_variant	MODIFIER	h1_chr15-_g23853	C|T	T|T	T|T	T|T	T|T	T|T	T|T	T|T	T|T	T|T	T|T	T|T	T|T	T|T	NA	NA	NA	NA
507	h1_chr15	11086102	G	T	upstream_gene_variant	MODIFIER	h1_chr15-_g23853	G|T	T|T	T|T	T|T	T|T	NA	NA	NA	T|T	T|T	T|T	NA	NA	NA	NA	NA	NA	NA
508	h1_chr15	11086104	C	A	upstream_gene_variant	MODIFIER	h1_chr15-_g23853	C|A	A|A	A|A	A|A	A|A	NA	C|A	C|A	A|A	A|A	A|A	NA	NA	C|C	NA	NA	same	NA
509	h1_chr15	11086109	A	G	upstream_gene_variant	MODIFIER	h1_chr15-_g23853	A|G	G|G	G|G	G|G	G|G	NA	A|G	A|G	G|G	G|G	G|G	NA	NA	A|A	NA	NA	same	NA
510	h1_chr15	11086131	T	A	upstream_gene_variant	MODIFIER	h1_chr15-_g23853	T|A	A|A	A|A	A|A	A|A	NA	T|A	T|A	A|A	A|A	A|A	NA	NA	T|T	NA	NA	same	NA
511	h1_chr15	11086193	G	A	upstream_gene_variant	MODIFIER	h1_chr15-_g23853	G|A	A|A	A|A	A|A	A|A	NA	G|A	G|A	A|A	A|A	A|A	NA	NA	G|G	NA	NA	same	NA
512	h1_chr15	11086195	A	G	upstream_gene_variant	MODIFIER	h1_chr15-_g23853	A|G	G|G	G|G	G|G	G|G	NA	A|G	A|G	G|G	G|G	G|G	NA	NA	A|A	NA	NA	same	NA
513	h1_chr15	11086204	T	A	upstream_gene_variant	MODIFIER	h1_chr15-_g23853	T|A	A|A	A|A	A|A	A|A	NA	NA	NA	A|A	A|A	A|A	NA	NA	NA	NA	NA	NA	NA
514	h1_chr15	11086209	C	G	upstream_gene_variant	MODIFIER	h1_chr15-_g23853	C|G	G|G	G|G	G|G	G|G	NA	NA	NA	G|G	G|G	G|G	NA	NA	NA	NA	NA	NA	NA
515	h1_chr15	11086231	C	T	upstream_gene_variant	MODIFIER	h1_chr15-_g23853	C|T	T|T	T|T	T|T	T|T	NA	NA	NA	T|T	T|T	T|T	NA	NA	NA	NA	same	NA	NA
516	h1_chr15	11086234	G	A	upstream_gene_variant	MODIFIER	h1_chr15-_g23853	G|A	A|A	A|A	A|A	A|A	NA	NA	NA	A|A	A|A	A|A	NA	NA	NA	NA	same	NA	NA
517	h1_chr15	11086256	C	CAT	upstream_gene_variant	MODIFIER	h1_chr15-_g23853	C|CAT	CAT|CAT	CAT|CAT	CAT|CAT	CAT|CAT	C|CAT	CAT|CAT	CAT|CAT	CAT|CAT	CAT|CAT	CAT|CAT	CAT|CAT	.|.	CAT|CAT	NA	NA	NA	NA
518	h1_chr15	11086321	T	TA	upstream_gene_variant	MODIFIER	h1_chr15-_g23853	T|TA	TA|TA	TA|TA	TA|TA	TA|TA	TA|TA	TA|TA	TA|TA	TA|TA	TA|TA	TA|TA	TA|TA	TA|TA	TA|TA	NA	NA	NA	NA
519	h1_chr15	11086339	G	C	upstream_gene_variant	MODIFIER	h1_chr15-_g23853	G|C	C|C	C|C	C|C	C|C	NA	NA	NA	C|C	C|C	C|C	NA	NA	NA	NA	NA	NA	NA
520	h1_chr15	11086369	T	C	upstream_gene_variant	MODIFIER	h1_chr15-_g23853	T|C	C|C	C|C	C|C	C|C	T|C	T|C	T|C	C|C	C|C	C|C	T|T	T|T	T|T	NA	same	same	NA
521	h1_chr15	11086389	G	A	upstream_gene_variant	MODIFIER	h1_chr15-_g23853	G|A	A|A	A|A	A|A	A|A	NA	G|A	G|A	A|A	A|A	A|A	NA	NA	G|G	NA	NA	same	NA
522	h1_chr15	11086429	A	G	upstream_gene_variant	MODIFIER	h1_chr15-_g23853	A|G	G|G	NA	NA	NA	NA	NA	NA	NA	NA	NA	NA	NA	NA	NA	NA	NA	NA
523	h1_chr15	11086451	G	T	upstream_gene_variant	MODIFIER	h1_chr15-_g23853	G|T	T|T	T|T	T|T	T|T	NA	NA	NA	T|T	T|T	T|T	NA	NA	NA	NA	NA	NA	NA
524	h1_chr15	11086465	C	T	upstream_gene_variant	MODIFIER	h1_chr15-_g23853	C|T	T|T	T|T	T|T	T|T	NA	NA	NA	T|T	T|T	T|T	NA	NA	NA	NA	NA	NA	NA
525	h1_chr15	11086479	T	C	upstream_gene_variant	MODIFIER	h1_chr15-_g23853	T|C	C|C	C|C	C|C	C|C	NA	NA	NA	C|C	C|C	C|C	NA	NA	NA	NA	NA	NA	NA
526	h1_chr15	11086541	A	T	upstream_gene_variant	MODIFIER	h1_chr15-_g23853	A|T	T|T	T|T	T|T	T|T	A|T	A|T	A|T	T|T	T|T	T|T	A|A	A|A	A|A	NA	same	same	NA
527	h1_chr15	11086642	G	A	upstream_gene_variant	MODIFIER	h1_chr15-_g23853	G|A	A|A	A|A	A|A	A|A	NA	NA	NA	A|A	A|A	A|A	NA	NA	NA	NA	NA	NA	NA
528	h1_chr15	11086643	C	T	upstream_gene_variant	MODIFIER	h1_chr15-_g23853	C|T	T|T	T|T	T|T	T|T	NA	NA	NA	T|T	T|T	T|T	NA	NA	NA	NA	NA	NA	NA
529	h1_chr15	11086664	A	T	upstream_gene_variant	MODIFIER	h1_chr15-_g23853	A|T	T|T	T|T	T|T	T|T	NA	NA	NA	T|T	T|T	T|T	NA	NA	NA	NA	NA	NA	NA
530	h1_chr15	11086705	C	CT	upstream_gene_variant	MODIFIER	h1_chr15-_g23853	C|CT	CT|CT	CT|CT	CT|CT	CT|CT	CT|CT	C|CT	C|CT	CT|CT	CT|CT	CT|CT	CT|CT	CT|CT	CT|CT	NA	NA	same	NA
531	h1_chr15	11086827	AAATAGGTTTAATTTGGTAGGTTATTT	A	upstream_gene_variant	MODIFIER	h1_chr15-_g23853	AAATAGGTTTAATTTGGTAGGTTATTT|A	A|A	A|A	A|A	A|A	NA	NA	NA	A|A	A|A	A|A	NA	NA	NA	NA	NA	NA	NA
532	h1_chr15	11086866	G	A	upstream_gene_variant	MODIFIER	h1_chr15-_g23853	G|A	A|A	A|A	A|A	A|A	NA	NA	NA	A|A	A|A	A|A	NA	NA	NA	NA	NA	NA	NA
533	h1_chr15	11086893	C	G	upstream_gene_variant	MODIFIER	h1_chr15-_g23853	C|G	G|G	G|G	G|G	G|G	NA	NA	NA	G|G	G|G	G|G	NA	NA	NA	NA	NA	NA	NA
534	h1_chr15	11086921	T	A	upstream_gene_variant	MODIFIER	h1_chr15-_g23853	T|A	A|A	A|A	A|A	A|A	NA	NA	NA	A|A	A|A	A|A	NA	NA	NA	NA	NA	NA	NA
535	h1_chr15	11086934	T	G	upstream_gene_variant	MODIFIER	h1_chr15-_g23853	T|G	G|G	G|G	G|G	G|G	NA	NA	NA	G|G	G|G	G|G	NA	NA	NA	NA	same	NA	NA
536	h1_chr15	11086988	T	G	upstream_gene_variant	MODIFIER	h1_chr15-_g23853	T|G	G|G	G|G	G|G	G|G	NA	NA	NA	G|G	G|G	G|G	NA	NA	NA	NA	NA	NA	NA
537	h1_chr15	11087094	CA	C	upstream_gene_variant	MODIFIER	h1_chr15-_g23853	CA|C	C|C	C|C	C|C	C|C	NA	C|CA	C|CA	C|C	C|C	C|C	NA	NA	CA|CA	NA	NA	same	NA
538	h1_chr15	11087141	A	T	upstream_gene_variant	MODIFIER	h1_chr15-_g23853	A|T	T|T	T|T	T|T	T|T	NA	A|T	A|T	T|T	T|T	T|T	NA	NA	A|A	NA	NA	same	NA
539	h1_chr15	11087185	T	G	upstream_gene_variant	MODIFIER	h1_chr15-_g23853	T|G	G|G	G|G	G|G	G|G	NA	NA	NA	G|G	G|G	G|G	NA	NA	NA	NA	NA	NA	NA
540	h1_chr15	11087239	G	C	upstream_gene_variant	MODIFIER	h1_chr15-_g23853	G|C	C|C	C|C	C|C	C|C	NA	NA	NA	C|C	C|C	C|C	NA	NA	NA	NA	NA	NA	NA
541	h1_chr15	11088119	G	C	upstream_gene_variant	MODIFIER	h1_chr15-_g23853	G|C	C|C	C|C	C|C	C|C	C|C	G|C	G|C	C|C	C|C	C|C	.|.	C|C	G|G	NA	NA	same	NA
542	h1_chr15	11088148	G	A	upstream_gene_variant	MODIFIER	h1_chr15-_g23853	G|A	A|A	NA	NA	NA	A|A	G|A	G|A	NA	NA	NA	A|A	A|A	G|A	NA	NA	NA	NA
543	h1_chr15	11088766	T	C	upstream_gene_variant	MODIFIER	h1_chr15-_g23853	T|C	C|C	NA	NA	NA	C|C	T|C	T|C	NA	NA	NA	C|C	C|C	.|.	NA	NA	NA	NA
544	h1_chr15	11090076	T	A	intergenic_region	MODIFIER	h1_chr15-_g23853-h1_chr15-_g23854	T|A	A|A	A|A	A|A	A|A	A|A	.|.	A|A	A|A	A|A	A|A	A|A	A|A	A|A	NA	NA	NA	NA
545	h1_chr15	11090275	T	C	intergenic_region	MODIFIER	h1_chr15-_g23853-h1_chr15-_g23854	T|C	C|C	C|C	C|C	C|C	C|C	.|.	C|C	C|C	C|C	C|C	C|C	C|C	C|C	NA	NA	NA	NA
546	h1_chr15	11090417	A	T	intergenic_region	MODIFIER	h1_chr15-_g23853-h1_chr15-_g23854	A|T	T|T	NA	NA	NA	A|T	.|.	.|.	NA	NA	NA	.|.	.|.	T|T	NA	NA	NA	NA
547	h1_chr15	11090423	A	C	intergenic_region	MODIFIER	h1_chr15-_g23853-h1_chr15-_g23854	A|C	C|C	C|C	C|C	C|C	C|C	.|.	.|.	.|.	C|C	C|C	.|.	.|.	C|C	NA	NA	NA	NA
548	h1_chr15	11090446	T	G	intergenic_region	MODIFIER	h1_chr15-_g23853-h1_chr15-_g23854	T|G	G|G	G|G	G|G	G|G	G|G	.|.	.|.	G|G	G|G	G|G	.|.	.|.	G|G	NA	NA	NA	NA
549	h1_chr15	11090522	T	G	intergenic_region	MODIFIER	h1_chr15-_g23853-h1_chr15-_g23854	T|G	G|G	.	G|G	G|G	G|G	.|.	G|G	G|G	G|G	G|G	.|.	.|.	G|G	NA	NA	NA	NA
550	h1_chr15	11092335	T	C	intergenic_region	MODIFIER	h1_chr15-_g23853-h1_chr15-_g23854	T|C	C|C	C|C	C|C	C|C	C|C	NA	NA	T|C	C|C	T|C	C|C	C|C	NA	NA	NA	NA	NA
551	h1_chr15	11092370	G	A	intergenic_region	MODIFIER	h1_chr15-_g23853-h1_chr15-_g23854	G|A	A|A	NA	NA	NA	A|A	NA	NA	NA	NA	NA	A|A	A|A	NA	NA	NA	NA	NA
552	h1_chr15	11094239	T	C	intergenic_region	MODIFIER	h1_chr15-_g23853-h1_chr15-_g23854	T|C	C|C	C|C	C|C	C|C	NA	NA	NA	C|C	C|C	C|C	NA	NA	NA	NA	NA	NA	NA
553	h1_chr15	11094250	G	T	intergenic_region	MODIFIER	h1_chr15-_g23853-h1_chr15-_g23854	G|T	T|T	T|T	T|T	T|T	NA	NA	NA	T|T	T|T	T|T	NA	NA	NA	NA	NA	NA	NA
554	h1_chr15	11094628	A	G	intergenic_region	MODIFIER	h1_chr15-_g23853-h1_chr15-_g23854	A|G	G|G	G|G	G|G	G|G	NA	NA	NA	G|G	G|G	G|G	NA	NA	NA	NA	NA	NA	NA
555	h1_chr15	11094632	C	T	intergenic_region	MODIFIER	h1_chr15-_g23853-h1_chr15-_g23854	C|T	T|T	C|T	C|T	C|T	NA	NA	NA	C|T	C|T	C|T	NA	NA	NA	NA	NA	NA	NA
556	h1_chr15	11094783	A	G	intergenic_region	MODIFIER	h1_chr15-_g23853-h1_chr15-_g23854	A|G	G|G	NA	NA	NA	NA	NA	NA	NA	NA	NA	NA	NA	NA	NA	NA	NA	NA
557	h1_chr15	11094802	A	G	intergenic_region	MODIFIER	h1_chr15-_g23853-h1_chr15-_g23854	A|G	G|G	G|G	A|G	G|G	NA	NA	NA	G|G	G|G	G|G	NA	NA	NA	NA	NA	NA	NA
558	h1_chr15	11095049	A	G	intergenic_region	MODIFIER	h1_chr15-_g23853-h1_chr15-_g23854	A|G	G|G	G|G	G|G	G|G	NA	NA	NA	G|G	G|G	G|G	NA	NA	NA	NA	NA	NA	NA
559	h1_chr15	11095565	A	G	intergenic_region	MODIFIER	h1_chr15-_g23853-h1_chr15-_g23854	A|G	G|G	A|G	A|G	A|G	G|G	NA	NA	A|G	A|G	A|G	G|G	G|G	NA	NA	NA	NA	NA
560	h1_chr15	11104199	A	C	intergenic_region	MODIFIER	h1_chr15-_g23853-h1_chr15-_g23854	A|C	C|C	C|C	C|C	C|C	C|C	C|C	C|C	C|C	C|C	C|C	C|C	C|C	C|C	NA	NA	NA	NA
561	h1_chr15	11104377	T	C	intergenic_region	MODIFIER	h1_chr15-_g23853-h1_chr15-_g23854	T|C	C|C	C|C	C|C	C|C	NA	T|C	T|C	C|C	C|C	C|C	NA	NA	T|C	NA	NA	NA	NA
562	h1_chr15	11106094	A	T	intergenic_region	MODIFIER	h1_chr15-_g23853-h1_chr15-_g23854	A|T	T|T	T|T	T|T	T|T	T|T	T|T	T|T	T|T	T|T	T|T	T|T	T|T	T|T	NA	NA	NA	NA
563	h1_chr15	11106117	GT	G	intergenic_region	MODIFIER	h1_chr15-_g23853-h1_chr15-_g23854	GT|G	G|G	G|G	G|G	G|G	G|G	GT|G	GT|G	G|G	G|G	G|G	G|G	G|G	GT|G	NA	NA	NA	NA
564	h1_chr15	11106411	A	T	intergenic_region	MODIFIER	h1_chr15-_g23853-h1_chr15-_g23854	A|T	T|T	T|T	T|T	T|T	T|T	T|T	T|T	T|T	T|T	T|T	T|T	T|T	T|T	NA	NA	NA	NA
565	h1_chr15	11121201	G	T	downstream_gene_variant	MODIFIER	h1_chr15-_g23854	G|T	T|T	T|T	G|T	G|T	T|T	G|T	G|T	.|.	T|T	T|T	T|T	T|T	T|T	NA	NA	same	NA
566	h1_chr15	11140568	G	T	intergenic_region	MODIFIER	h1_chr15-_g23854-h1_chr15+_g23855	G|T	T|T	T|T	T|T	T|T	T|T	.|.	G|G	T|T	T|T	T|T	T|T	T|T	T|T	NA	NA	NA	NA
567	h1_chr15	11194495	T	C	missense_variant	MODERATE	h1_chr15+_g23855	T|C	C|C	C|C	C|C	C|C	C|C	T|C	T|C	C|C	C|C	C|C	C|C	C|C	C|C	NA	NA	same	NA
568	h1_chr15	11194609	T	G	missense_variant	MODERATE	h1_chr15+_g23855	T|G	G|G	G|G	G|G	G|G	G|G	T|G	T|G	G|G	G|G	G|G	G|G	G|G	G|G	NA	NA	same	NA
569	h1_chr15	11194750	T	G	missense_variant	MODERATE	h1_chr15+_g23855	T|G	G|G	G|G	G|G	G|G	G|G	T|G	T|G	G|G	G|G	G|G	G|G	G|G	G|G	NA	NA	same	NA
570	h1_chr15	11194935	A	G	missense_variant	MODERATE	h1_chr15+_g23855	A|G	G|G	G|G	G|G	G|G	G|G	A|G	A|G	G|G	G|G	G|G	G|G	G|G	G|G	NA	NA	same	NA
571	h1_chr15	11194948	T	C	missense_variant	MODERATE	h1_chr15+_g23855	T|C	C|C	C|C	C|C	C|C	C|C	T|C	T|C	C|C	C|C	C|C	C|C	C|C	C|C	NA	NA	same	NA
572	h1_chr15	11195500	T	C	intron_variant	MODIFIER	h1_chr15+_g23855	T|C	C|C	C|C	C|C	C|C	C|C	T|C	T|C	C|C	C|C	C|C	C|C	C|C	C|C	NA	NA	same	NA
573	h1_chr15	11196113	A	T	downstream_gene_variant	MODIFIER	h1_chr15+_g23855	A|T	T|T	T|T	T|T	T|T	T|T	T|T	A|T	T|T	T|T	T|T	T|T	T|T	T|T	NA	NA	NA	NA

## Sheet: Caption
Supplementary Data 1. Summary of W-specific polymorphisms on the W haplotype of Salix herbacea. Position (Pos), reference allele (Ref.Sher), alternative allele (Alt.Sher), variant effect, putative impact and annotated gene ID of the polymorphisms in S. herbacea are given together with the genotype in S. herbacea (Sher.F and Sher.M), and the genotype in other 12 individuals of S. viminalis, S. pup…
